# Supplementary material for: Drug–pathway interaction prediction via multiple feature fusion
Source: Royal Society of Chemistry journal article supplement (doi:10.1039/c4mb00199k), 2014-08-14
Supplement: c4mb00199k2.pdf [file c4mb00199k2.pdf]

## Supplementary Materials

### Appendix 1

**Table S1:** Top 50 drug-pathway associations that were predicted by GIP.

| Pathway ID (hsa00) | Drug ID(KEGG) |
|--------------------|---------------|
| 4010               | D06407        |
| 4060               | D09689        |
| 4080               | D00371        |
| 4010               | D09883        |
| 4370               | D09589        |
| 4270               | D00227        |
| 4020               | D09635        |
| 240                | D05400        |
| 4012               | D01441        |
| 4060               | D09883        |
| 4060               | D09690        |
| 140                | D00075        |
| 4510               | D10224        |
| 4012               | D08066        |
| 4020               | D08907        |
| 5212               | D04023        |
| 4510               | D10190        |
| 4370               | D01441        |
| 4370               | D10465        |
| 4010               | D04025        |
| 5110               | D08369        |
| 983                | D07974        |
| 4020               | D08883        |
| 4012               | D10405        |
| 4370               | D08907        |
| 4370               | D10064        |
| 4730               | D08369        |
| 4060               | D08279        |
| 4370               | D03350        |
| 4110               | D10441        |
| 4020               | D08881        |
| 230                | D01846        |
| 4370               | D09010        |
| 4060               | D03736        |
| 4060               | D10202        |

|      |        |
|------|--------|
| 4010 | D09683 |
| 4110 | D08066 |
| 4370 | D09690 |
| 3320 | D04050 |
| 4610 | D00138 |
| 4060 | D10175 |
| 4010 | D05819 |
| 4510 | D09903 |
| 4920 | D04050 |
| 4012 | D09920 |
| 4060 | D10064 |
| 4010 | D08369 |
| 4370 | D00752 |
| 4010 | D10202 |
| 4370 | D04023 |
| 4150 | D00107 |

**Table S2:** Top 50 drug-pathway associations that were predicted by GBSSL.

| Pathway ID (hsa00) | Drug ID(KEGG) |
|--------------------|---------------|
| 4080               | D00371        |
| 4370               | D10486        |
| 4060               | D09728        |
| 4060               | D03252        |
| 4270               | D00371        |
| 4010               | D09883        |
| 4270               | D00227        |
| 4510               | D10190        |
| 4370               | D10465        |
| 140                | D00075        |
| 4060               | D09883        |
| 4510               | D10224        |
| 4010               | D06407        |
| 4010               | D09618        |
| 670                | D03998        |
| 4060               | D09689        |
| 240                | D03998        |
| 4370               | D09919        |
| 4370               | D01977        |
| 4010               | D09683        |
| 4020               | D09618        |
| 4010               | D10190        |
| 4370               | D09920        |

|      |        |
|------|--------|
| 4012 | D08881 |
| 4060 | D09690 |
| 4910 | D02042 |
| 4910 | D09786 |
| 5110 | D10222 |
| 5215 | D02008 |
| 4650 | D10078 |
| 4370 | D09589 |
| 4020 | D03898 |
| 3320 | D10019 |
| 3320 | D10319 |
| 4020 | D09635 |
| 4020 | D10190 |
| 4370 | D09883 |
| 4610 | D05834 |
| 4020 | D08881 |
| 4370 | D08656 |
| 4270 | D03898 |
| 5110 | D10431 |
| 5110 | D00944 |
| 4510 | D08552 |
| 3320 | D00126 |
| 4920 | D00126 |
| 4370 | D04498 |
| 4370 | D03350 |
| 4610 | D03978 |
| 4370 | D09010 |

**Table S3:** Top 50 drug-pathway associations that were predicted by BLM.

| Pathway ID (hsa00) | Drug ID(KEGG) |
|--------------------|---------------|
| 982                | D05147        |
| 4080               | C01245        |
| 4080               | C00165        |
| 4012               | D05147        |
| 4080               | C00575        |
| 4610               | D05147        |
| 140                | D00075        |
| 4080               | D00371        |
| 4010               | D09883        |
| 480                | D00707        |
| 4930               | C05981        |
| 4270               | D00371        |

|      |        |
|------|--------|
| 4060 | D10202 |
| 4060 | D09883 |
| 4510 | D05147 |
| 4520 | C05981 |
| 5211 | C05981 |
| 230  | C01245 |
| 5212 | C05981 |
| 4512 | C05981 |
| 240  | D00752 |
| 240  | D01206 |
| 240  | D02365 |
| 240  | D04936 |
| 240  | D05094 |
| 240  | D05095 |
| 4370 | D09010 |
| 670  | D01155 |
| 670  | D02368 |
| 670  | D10222 |
| 4020 | D03898 |
| 983  | D03378 |
| 983  | D03546 |
| 983  | D04245 |
| 4270 | D03898 |
| 240  | D03998 |
| 4010 | D09618 |
| 230  | D01846 |
| 983  | D06596 |
| 983  | D03828 |
| 983  | D06503 |
| 983  | D07472 |
| 4370 | D10486 |
| 983  | D10431 |
| 4110 | D05147 |
| 230  | D06102 |
| 4020 | D10202 |
| 4010 | D10202 |

## Appendix 2

**Table S4:** the possible drug-pathway interactions that predicted by GIP and GBSSL methods

| Predicted Drug-pathway interaction | Drug structure                                                                                                                                                                                                                                                                                                                                            |
|------------------------------------|-----------------------------------------------------------------------------------------------------------------------------------------------------------------------------------------------------------------------------------------------------------------------------------------------------------------------------------------------------------|
| hsa004510<br>D10224s               | <div style="display: flex; justify-content: space-around;"> <div style="text-align: center;"> 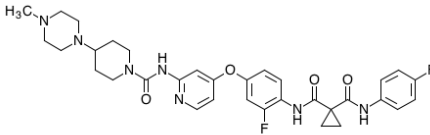 <p>D10224</p> </div> <div style="text-align: center;">  <p>D10465</p> </div> </div>     |
| hsa004012<br>D08066s               | <div style="display: flex; justify-content: space-around;"> <div style="text-align: center;">  <p>D08066</p> </div> <div style="text-align: center;">  <p>D01441</p> </div> </div>     |
| hsa004370<br>D10465s               | <div style="display: flex; justify-content: space-around;"> <div style="text-align: center;">  <p>D10465</p> </div> <div style="text-align: center;">  <p>D10224</p> </div> </div>     |
| hsa00983<br>D07974s                | <div style="display: flex; justify-content: space-around;"> <div style="text-align: center;">  <p>D07974</p> </div> <div style="text-align: center;">  <p>D00584</p> </div> </div>   |
| hsa04110<br>D08066                 | <div style="display: flex; justify-content: space-around;"> <div style="text-align: center;">  <p>D08066</p> </div> <div style="text-align: center;">  <p>D01441</p> </div> </div> |
| hsa04370<br>D09010s                | <div style="display: flex; justify-content: space-around;"> <div style="text-align: center;">  <p>D09010</p> </div> <div style="text-align: center;">  <p>D00330</p> </div> </div> |

Note: the left side in drug structure column is 2d-structure of drugs which were predicted to have association with pathways, and the right side is the 2d-structure of drugs which known to have associations with corresponding pathways.
