# Supplementary material for: Drug–pathway interaction prediction via multiple feature fusion
Source: Royal Society of Chemistry journal article supplement (doi:10.1039/c4mb00199k), 2014-08-14
Supplement: c4mb00199k3.zip [file c4mb00199k3.zip]

## Sheet: Sheet1
	D09925	D08954	D10381	D10382	D09692	D09730	D09913	D10079	D10157	D06320	D06413	D06637	D08870	D08953	D09338	D09357	D09604	D09641	D10019	D10060	D10084	D10154	D10155	D10182	D10183	D10319	D10372	D10397	D01441	D03658	D06414	D08066	D10202	D00160	D00181	D01136	D01672	D01844	D01981	D03213	D03722	D03728	D04029	D04183	D04492	D07082	D07086	D07143	D07144
D09925	1	0.152542	0.178571	0.178571	0.163265	0.258621	0.136364	0.20075	0.186736	0.12	0.269841	0.013699	0.2	0.269841	0.257036	0.320755	0.189655	0.320755	0.186441	0.192982	0.192982	0.169492	0.169492	0.16	0.16	0.203704	0.233333	0.157895	0.242424	0.15873	0.15873	0.258065	0.276923	0	0.083455	0.043478	0.084746	0	0.106061	0.209677	0.107692	0.161765	0.316667	0.21875	0.069767	0.232877	0.131148	0.111111	0.246377
D08954	0.152542	1	0.176471	0.176471	0.133333	0.175439	0.128205	0.208333	0.192308	0.111111	0.15625	0.014925	0.166307	0.15625	0.166348	0.163636	0.125	0.163636	0.20075	0.163227	0.163227	0.188679	0.188679	0.109589	0.109589	0.221532	0.096774	0.153846	0.206349	0.135593	0.135593	0.142857	0.132353	0	0.0625	0	0.16	0.032787	0.063492	0.131148	0.137931	0.135303	0.140625	0.16129	0.056	0.178121	0.105263	0.066667	0.12202
D10381	0.178571	0.176471	1	1	0.113636	0.203704	0.2	0.244444	0.22449	0.142857	0.210084	0	0.229314	0.210084	0.229167	0.24	0.244898	0.24	0.215686	0.242236	0.242236	0.196078	0.196078	0.144928	0.144928	0.23913	0.178571	0.208333	0.213115	0.24283	0.24283	0.22807	0.209677	0.027778	0.118644	0.025641	0.076923	0	0.12069	0.196429	0.163636	0.158238	0.224138	0.186441	0.083333	0.171429	0.22	0.127273	0.181818
D10382	0.178571	0.176471	1	1	0.113636	0.203704	0.2	0.244444	0.22449	0.142857	0.210084	0	0.229314	0.210084	0.229167	0.24	0.244898	0.24	0.215686	0.242236	0.242236	0.196078	0.196078	0.144928	0.144928	0.23913	0.178571	0.208333	0.213115	0.24283	0.24283	0.22807	0.209677	0.027778	0.118644	0.025641	0.076923	0	0.12069	0.196429	0.163636	0.158238	0.224138	0.186441	0.083333	0.171429	0.22	0.127273	0.181818
D09692	0.163265	0.133333	0.113636	0.113636	1	0.191489	0.269231	0.205128	0.186047	0.114286	0.145455	0.017857	0.131579	0.145455	0.136364	0.177778	0.181818	0.177778	0.177778	0.159091	0.159091	0.083333	0.083333	0.147541	0.147541	0.2	0.1875	0.166667	0.160714	0.191489	0.191489	0.173077	0.157895	0	0.1875	0.033333	0.068182	0	0.12	0.16	0.122449	0.127273	0.127273	0.12963	0.061404	0.123077	0.130435	0.12766	0.131148
D09730	0.258621	0.175439	0.203704	0.203704	0.191489	1	0.195122	0.235294	0.218182	0.122449	0.19697	0.028169	0.18	0.19697	0.222222	0.232143	0.214286	0.232143	0.254545	0.288462	0.288462	0.172414	0.172414	0.283582	0.283582	0.28	0.303571	0.181818	0.306452	0.285714	0.285714	0.327586	0.242424	0	0.17175	0.068182	0.067797	0	0.220339	0.254237	0.20339	0.278689	0.21875	0.222222	0.151261	0.171053	0.214286	0.232143	0.180556
D09913	0.136364	0.128205	0.2	0.2	0.269231	0.195122	1	0.142857	0.128205	0.142857	0.166667	0	0.16129	0.166667	0.162162	0.15	0.097561	0.15	0.121951	0.157895	0.157895	0.153846	0.153846	0.145455	0.145455	0.138889	0.111111	0.166667	0.137255	0.166667	0.166667	0.148936	0.156863	0	0.111111	0	0.111111	0	0.113636	0.133333	0.090909	0.145833	0.145833	0.125	0.045872	0.137931	0.184211	0.121951	0.148148
D10079	0.20075	0.208333	0.244444	0.244444	0.205128	0.235294	0.142857	1	0.870968	0.095238	0.12	0.04918	0.176471	0.12	0.258278	0.242236	0.204082	0.242236	0.304348	0.234043	0.234043	0.255319	0.255319	0.132353	0.132353	0.341463	0.185185	0.191489	0.220339	0.145455	0.139241	0.236364	0.177419	0	0.122807	0.027027	0.148936	0	0.166667	0.267057	0.127273	0.144279	0.169492	0.182609	0.057851	0.15942	0.255319	0.176471	0.169231
D10157	0.186736	0.192308	0.22449	0.22449	0.186047	0.218182	0.128205	0.870968	1	0.086957	0.112782	0.046154	0.16129	0.112782	0.237323	0.223709	0.188679	0.223709	0.28	0.215686	0.215686	0.235294	0.235294	0.125	0.125	0.311111	0.172414	0.176471	0.206349	0.135593	0.129848	0.220339	0.166667	0	0.114754	0.02439	0.137255	0	0.155172	0.24774	0.118644	0.135303	0.15873	0.170732	0.056	0.150685	0.235294	0.163636	0.15942
D06320	0.12	0.111111	0.142857	0.142857	0.114286	0.122449	0.142857	0.095238	0.086957	1	0.127273	0	0.3125	0.127273	0.166667	0.155556	0.108696	0.155556	0.181818	0.25	0.25	0.0625	0.0625	0.078125	0.078125	0.205128	0.076923	0.090909	0.122807	0.138716	0.138716	0.132075	0.12069	0.173913	0.12	0	0.210526	0	0.170213	0.096154	0.255814	0.173077	0.109091	0.071429	0.111111	0.16129	0.133333	0.155556	0.172414
D06413	0.269841	0.15625	0.210084	0.210084	0.145455	0.19697	0.166667	0.12	0.112782	0.127273	1	0	0.178571	1	0.303571	0.461538	0.153846	0.461538	0.206349	0.213115	0.213115	0.171875	0.171875	0.192308	0.192308	0.224138	0.212121	0.214165	0.45937	0.253968	0.253968	0.492007	0.508475	0	0.066667	0	0.060606	0	0.082192	0.173913	0.083333	0.133333	0.328125	0.150685	0.066667	0.230769	0.153846	0.085714	0.243243
D06637	0.013699	0.014925	0	0	0.017857	0.028169	0	0.04918	0.046154	0	0	1	0	0	0	0	0.029851	0	0.014493	0	0	0	0	0.0875	0.0875	0	0.027778	0.03125	0.012346	0.013889	0.013889	0.012987	0.024691	0	0.042254	0.066667	0	0	0.042857	0.056338	0.028571	0.039474	0	0.012987	0.022222	0	0.095238	0.044776	0
D08870	0.2	0.166307	0.229314	0.229314	0.131579	0.18	0.16129	0.176471	0.16129	0.3125	0.178571	0	1	0.178571	0.232558	0.217391	0.138716	0.217391	0.333333	0.255814	0.255814	0.208791	0.208791	0.117917	0.117917	0.378378	0.111111	0.147903	0.172414	0.156863	0.156863	0.185185	0.169492	0	0.176471	0	0.086957	0.008547	0.113208	0.173077	0.16	0.27451	0.181818	0.163636	0.078261	0.151515	0.170213	0.12	0.16129
D08953	0.269841	0.15625	0.210084	0.210084	0.145455	0.19697	0.166667	0.12	0.112782	0.127273	1	0	0.178571	1	0.303571	0.461538	0.153846	0.461538	0.206349	0.213115	0.213115	0.171875	0.171875	0.192308	0.192308	0.224138	0.212121	0.214165	0.45937	0.253968	0.253968	0.492007	0.508475	0	0.066667	0	0.060606	0	0.082192	0.173913	0.083333	0.133333	0.328125	0.150685	0.066667	0.230769	0.153846	0.085714	0.243243
D09338	0.257036	0.166348	0.229167	0.229167	0.136364	0.222222	0.162162	0.258278	0.237323	0.166667	0.303571	0	0.232558	0.303571	1	0.657895	0.185468	0.657895	0.369565	0.386364	0.386364	0.163227	0.163227	0.126761	0.126761	0.414634	0.135593	0.189516	0.388889	0.19349	0.19349	0.42	0.288136	0	0.098361	0	0.212766	0	0.222222	0.192982	0.140351	0.180328	0.263158	0.145161	0.110169	0.296875	0.192308	0.166667	0.316667
D09357	0.320755	0.163636	0.24	0.24	0.177778	0.232143	0.15	0.242236	0.223709	0.155556	0.461538	0	0.217391	0.461538	0.657895	1	0.203704	1	0.346939	0.361702	0.361702	0.175407	0.175407	0.185714	0.185714	0.386364	0.206897	0.215686	0.56	0.24774	0.24774	0.608696	0.436364	0	0.09375	0	0.132075	0	0.15	0.224138	0.114754	0.171875	0.293103	0.174603	0.098361	0.264706	0.181818	0.157895	0.28125
D09604	0.189655	0.125	0.244898	0.244898	0.181818	0.214286	0.097561	0.204082	0.188679	0.108696	0.153846	0.029851	0.138716	0.153846	0.185468	0.203704	1	0.203704	0.175407	0.139241	0.139241	0.157324	0.157324	0.223881	0.223881	0.192843	0.254545	0.189084	0.222222	0.307692	0.307692	0.237288	0.2	0.025641	0.169492	0.102564	0.134615	0.007937	0.192982	0.22807	0.175439	0.187801	0.15625	0.15873	0.108333	0.164384	0.185185	0.181818	0.173913
D09641	0.320755	0.163636	0.24	0.24	0.177778	0.232143	0.15	0.242236	0.223709	0.155556	0.461538	0	0.217391	0.461538	0.657895	1	0.203704	1	0.346939	0.361702	0.361702	0.175407	0.175407	0.185714	0.185714	0.386364	0.206897	0.215686	0.56	0.24774	0.24774	0.608696	0.436364	0	0.09375	0	0.132075	0	0.15	0.224138	0.114754	0.171875	0.293103	0.174603	0.098361	0.264706	0.181818	0.157895	0.28125
D10019	0.186441	0.20075	0.215686	0.215686	0.177778	0.254545	0.121951	0.304348	0.28	0.181818	0.206349	0.014493	0.333333	0.206349	0.369565	0.346939	0.175407	0.346939	1	0.422222	0.422222	0.25	0.25	0.121622	0.121622	0.848485	0.147541	0.169811	0.258065	0.204188	0.204188	0.275862	0.19697	0.078947	0.166667	0.047619	0.153846	0.015873	0.169492	0.20339	0.152542	0.209677	0.179245	0.174603	0.135593	0.194444	0.181818	0.222222	0.205882
D10060	0.192982	0.163227	0.242236	0.242236	0.159091	0.288462	0.157895	0.234043	0.215686	0.25	0.213115	0	0.255814	0.213115	0.386364	0.361702	0.139241	0.361702	0.422222	1	1	0.188679	0.188679	0.125	0.125	0.475	0.172414	0.169591	0.245902	0.211573	0.211573	0.263158	0.241935	0.026316	0.133333	0	0.16	0.008	0.196429	0.254545	0.157895	0.237288	0.280702	0.2	0.109244	0.217391	0.235294	0.185185	0.230769
D10084	0.192982	0.163227	0.242236	0.242236	0.159091	0.288462	0.157895	0.234043	0.215686	0.25	0.213115	0	0.255814	0.213115	0.386364	0.361702	0.139241	0.361702	0.422222	1	1	0.188679	0.188679	0.125	0.125	0.475	0.172414	0.169591	0.245902	0.211573	0.211573	0.263158	0.241935	0.026316	0.133333	0	0.16	0.008	0.196429	0.254545	0.157895	0.237288	0.280702	0.2	0.109244	0.217391	0.235294	0.185185	0.230769
D10154	0.169492	0.188679	0.196078	0.196078	0.083333	0.172414	0.153846	0.255319	0.235294	0.0625	0.171875	0	0.208791	0.171875	0.163227	0.175407	0.157324	0.175407	0.25	0.188679	0.188679	1	1	0.123288	0.123288	0.22449	0.131148	0.150943	0.161388	0.133333	0.133333	0.17175	0.164179	0.081081	0.15	0.04878	0.092593	0.024194	0.096774	0.166667	0.080645	0.184	0.15625	0.258621	0.064	0.128818	0.122807	0.160714	0.136045
D10155	0.169492	0.188679	0.196078	0.196078	0.083333	0.172414	0.153846	0.255319	0.235294	0.0625	0.171875	0	0.208791	0.171875	0.163227	0.175407	0.157324	0.175407	0.25	0.188679	0.188679	1	1	0.123288	0.123288	0.22449	0.131148	0.150943	0.161388	0.133333	0.133333	0.17175	0.164179	0.081081	0.15	0.04878	0.092593	0.024194	0.096774	0.166667	0.080645	0.184	0.15625	0.258621	0.064	0.128818	0.122807	0.160714	0.136045
D10182	0.16	0.109589	0.144928	0.144928	0.147541	0.283582	0.145455	0.132353	0.125	0.078125	0.192308	0.0875	0.117917	0.192308	0.126761	0.185714	0.223881	0.185714	0.121622	0.125	0.125	0.123288	0.123288	1	1	0.114286	0.318182	0.215385	0.283784	0.264706	0.264706	0.3	0.246753	0	0.144737	0.109091	0.069444	0.028369	0.194444	0.205479	0.118421	0.194805	0.15	0.151899	0.124348	0.131868	0.205882	0.185714	0.137931
D10183	0.16	0.109589	0.144928	0.144928	0.147541	0.283582	0.145455	0.132353	0.125	0.078125	0.192308	0.0875	0.117917	0.192308	0.126761	0.185714	0.223881	0.185714	0.121622	0.125	0.125	0.123288	0.123288	1	1	0.114286	0.318182	0.215385	0.283784	0.264706	0.264706	0.3	0.246753	0	0.144737	0.109091	0.069444	0.028369	0.194444	0.205479	0.118421	0.194805	0.15	0.151899	0.124348	0.131868	0.205882	0.185714	0.137931
D10319	0.203704	0.221532	0.23913	0.23913	0.2	0.28	0.138889	0.341463	0.311111	0.205128	0.224138	0	0.378378	0.224138	0.414634	0.386364	0.192843	0.386364	0.848485	0.475	0.475	0.22449	0.22449	0.114286	0.114286	1	0.160714	0.1875	0.280702	0.223709	0.223709	0.301887	0.213115	0.028571	0.140351	0	0.170213	0	0.185185	0.222222	0.166667	0.186441	0.194539	0.15	0.112069	0.208955	0.2	0.196078	0.222222
D10372	0.233333	0.096774	0.178571	0.178571	0.1875	0.303571	0.111111	0.185185	0.172414	0.076923	0.212121	0.027778	0.111111	0.212121	0.135593	0.206897	0.254545	0.206897	0.147541	0.172414	0.172414	0.131148	0.131148	0.318182	0.318182	0.160714	1	0.245283	0.261538	0.327273	0.327273	0.278689	0.238806	0	0.150855	0.090909	0.066667	0	0.177419	0.271186	0.107692	0.161765	0.19697	0.164179	0.086614	0.153846	0.189655	0.186441	0.162162
D10397	0.157895	0.153846	0.208333	0.208333	0.166667	0.181818	0.166667	0.191489	0.176471	0.090909	0.214165	0.03125	0.147903	0.214165	0.189516	0.215686	0.189084	0.215686	0.169811	0.169591	0.169591	0.150943	0.150943	0.215385	0.215385	0.1875	0.245283	1	0.213115	0.25	0.25	0.22807	0.229508	0	0.118644	0.081081	0.064639	0.024793	0.128472	0.129848	0.09777	0.152597	0.183333	0.147541	0.065574	0.138889	0.237323	0.135531	0.147059
D01441	0.242424	0.206349	0.213115	0.213115	0.160714	0.306452	0.137255	0.220339	0.206349	0.122807	0.45937	0.012346	0.172414	0.45937	0.388889	0.56	0.222222	0.56	0.258065	0.245902	0.245902	0.161388	0.161388	0.283784	0.283784	0.280702	0.261538	0.213115	1	0.35	0.35	0.911111	0.568966	0	0.093333	0.037037	0.16129	0.021898	0.173913	0.257576	0.176471	0.175676	0.26087	0.194444	0.097744	0.289474	0.222222	0.181818	0.236842
D03658	0.15873	0.135593	0.24283	0.24283	0.191489	0.285714	0.166667	0.145455	0.135593	0.138716	0.253968	0.013889	0.156863	0.253968	0.19349	0.24774	0.307692	0.24774	0.204188	0.211573	0.211573	0.133333	0.133333	0.264706	0.264706	0.223709	0.327273	0.25	0.35	1	1	0.375	0.301587	0.023256	0.15873	0.044444	0.067797	0	0.125	0.193548	0.139647	0.15899	0.213064	0.184615	0.087302	0.155844	0.259259	0.131148	0.164384
D06414	0.15873	0.135593	0.24283	0.24283	0.191489	0.285714	0.166667	0.139241	0.129848	0.138716	0.253968	0.013889	0.156863	0.253968	0.19349	0.24774	0.307692	0.24774	0.204188	0.211573	0.211573	0.133333	0.133333	0.264706	0.264706	0.223709	0.327273	0.25	0.35	1	1	0.375	0.301587	0.023256	0.15873	0.044444	0.067797	0	0.125	0.193548	0.139647	0.15899	0.213064	0.184615	0.087302	0.155844	0.259259	0.131148	0.164384
D08066	0.258065	0.142857	0.22807	0.22807	0.173077	0.327586	0.148936	0.236364	0.220339	0.132075	0.492007	0.012987	0.185185	0.492007	0.42	0.608696	0.237288	0.608696	0.275862	0.263158	0.263158	0.17175	0.17175	0.3	0.3	0.301887	0.278689	0.22807	0.911111	0.375	0.375	1	0.611111	0	0.098592	0.04	0.096774	0	0.184615	0.274194	0.134328	0.185714	0.276923	0.205882	0.100775	0.236842	0.237288	0.193548	0.25
D10202	0.276923	0.132353	0.209677	0.209677	0.157895	0.242424	0.156863	0.177419	0.166667	0.12069	0.508475	0.024691	0.169492	0.508475	0.288136	0.436364	0.2	0.436364	0.19697	0.241935	0.241935	0.164179	0.164179	0.246753	0.246753	0.213115	0.238806	0.229508	0.568966	0.301587	0.301587	0.611111	1	0	0.121622	0.055556	0.057971	0	0.138889	0.183099	0.125	0.189189	0.396825	0.225352	0.088889	0.207317	0.2	0.144928	0.217949
D00160	0	0	0.027778	0.027778	0	0	0	0	0	0.173913	0	0	0	0	0	0	0.025641	0	0.078947	0.026316	0.026316	0.081081	0.081081	0	0	0.028571	0	0	0	0.023256	0.023256	0	0	1	0.097561	0.1875	0.129032	0.019802	0	0	0.04878	0.06383	0	0.065217	0.048077	0.070175	0	0.078947	0.075472
D00181	0.083455	0.0625	0.118644	0.118644	0.1875	0.17175	0.111111	0.122807	0.114754	0.12	0.066667	0.042254	0.176471	0.066667	0.098361	0.09375	0.169492	0.09375	0.166667	0.133333	0.133333	0.15	0.15	0.144737	0.144737	0.140351	0.150855	0.118644	0.093333	0.15873	0.15873	0.098592	0.121622	0.097561	1	0.142857	0.163636	0.03125	0.237288	0.102941	0.309091	0.403197	0.067568	0.147059	0.2	0.097561	0.131148	0.320755	0.102564
D01136	0.043478	0	0.025641	0.025641	0.033333	0.068182	0	0.027027	0.02439	0	0	0.066667	0	0	0	0	0.102564	0	0.047619	0	0	0.04878	0.04878	0.109091	0.109091	0	0.090909	0.081081	0.037037	0.044444	0.044444	0.04	0.055556	0.1875	0.142857	1	0	0.039216	0.093023	0.042553	0.045455	0.152174	0	0.061224	0.056604	0	0.075	0.157895	0
D01672	0.084746	0.16	0.076923	0.076923	0.068182	0.067797	0.111111	0.148936	0.137255	0.210526	0.060606	0	0.086957	0.060606	0.212766	0.132075	0.134615	0.132075	0.153846	0.16	0.16	0.092593	0.092593	0.069444	0.069444	0.170213	0.066667	0.064639	0.16129	0.067797	0.067797	0.096774	0.057971	0.129032	0.163636	0	1	0.02521	0.235294	0.101695	0.265306	0.131148	0.061538	0.096774	0.094017	0.355932	0.134615	0.176471	0.288136
D01844	0	0.032787	0	0	0	0	0	0	0	0	0	0	0.008547	0	0	0	0.007937	0	0.015873	0.008	0.008	0.024194	0.024194	0.028369	0.028369	0	0	0.024793	0.021898	0	0	0	0	0.019802	0.03125	0.039216	0.02521	1	0	0.007576	0.023622	0.030075	0	0.014925	0.031579	0.02069	0.007937	0.015873	0
D01981	0.106061	0.063492	0.12069	0.12069	0.12	0.220339	0.113636	0.166667	0.155172	0.170213	0.082192	0.042857	0.113208	0.082192	0.222222	0.15	0.192982	0.15	0.169492	0.196429	0.196429	0.096774	0.096774	0.194444	0.194444	0.185185	0.177419	0.128472	0.173913	0.125	0.125	0.184615	0.138889	0	0.237288	0.093023	0.235294	0	1	0.193548	0.314815	0.3	0.083333	0.115942	0.181034	0.186667	0.214286	0.725	0.197183
D03213	0.209677	0.131148	0.196429	0.196429	0.16	0.254237	0.133333	0.267057	0.24774	0.096154	0.173913	0.056338	0.173077	0.173913	0.192982	0.224138	0.22807	0.224138	0.20339	0.254545	0.254545	0.166667	0.166667	0.205479	0.205479	0.222222	0.271186	0.129848	0.257576	0.193548	0.193548	0.274194	0.183099	0	0.102941	0.042553	0.101695	0.007576	0.193548	1	0.123077	0.19403	0.19403	0.215385	0.094488	0.181818	0.346154	0.20339	0.191781
D03722	0.107692	0.137931	0.163636	0.163636	0.122449	0.20339	0.090909	0.127273	0.118644	0.255814	0.083333	0.028571	0.16	0.083333	0.140351	0.114754	0.175439	0.114754	0.152542	0.157895	0.157895	0.080645	0.080645	0.118421	0.118421	0.166667	0.107692	0.09777	0.176471	0.139647	0.139647	0.134328	0.125	0.04878	0.309091	0.045455	0.265306	0.023622	0.314815	0.123077	1	0.283333	0.084507	0.117647	0.20354	0.142857	0.155172	0.333333	0.105263
D03728	0.161765	0.135303	0.158238	0.158238	0.127273	0.278689	0.145833	0.144279	0.135303	0.173077	0.133333	0.039474	0.27451	0.133333	0.180328	0.171875	0.187801	0.171875	0.209677	0.237288	0.237288	0.184	0.184	0.194805	0.194805	0.186441	0.161765	0.152597	0.175676	0.15899	0.15899	0.185714	0.189189	0.06383	0.403197	0.152174	0.131148	0.030075	0.3	0.19403	0.283333	1	0.150685	0.238806	0.198659	0.17284	0.233333	0.415094	0.181818
D04029	0.316667	0.140625	0.224138	0.224138	0.127273	0.21875	0.145833	0.169492	0.15873	0.109091	0.328125	0	0.181818	0.328125	0.263158	0.293103	0.15625	0.293103	0.179245	0.280702	0.280702	0.15625	0.15625	0.15	0.15	0.194539	0.19697	0.183333	0.26087	0.213064	0.213064	0.276923	0.396825	0	0.067568	0	0.061538	0	0.083333	0.19403	0.084507	0.150685	1	0.220588	0.059259	0.233766	0.15625	0.086957	0.246575
D04183	0.21875	0.16129	0.186441	0.186441	0.12963	0.222222	0.125	0.182609	0.170732	0.071429	0.150685	0.012987	0.163636	0.150685	0.145161	0.174603	0.15873	0.174603	0.174603	0.2	0.2	0.258621	0.258621	0.151899	0.151899	0.15	0.164179	0.147541	0.194444	0.184615	0.184615	0.205882	0.225352	0.065217	0.147059	0.061224	0.096774	0.014925	0.115942	0.215385	0.117647	0.238806	0.220588	1	0.100775	0.185372	0.140625	0.193548	0.195219
D04492	0.069767	0.056	0.083333	0.083333	0.061404	0.151261	0.045872	0.057851	0.056	0.111111	0.066667	0.022222	0.078261	0.066667	0.110169	0.098361	0.108333	0.098361	0.135593	0.109244	0.109244	0.064	0.064	0.124348	0.124348	0.112069	0.086614	0.065574	0.097744	0.087302	0.087302	0.100775	0.088889	0.048077	0.2	0.056604	0.094017	0.031579	0.181034	0.094488	0.20354	0.198659	0.059259	0.100775	1	0.1	0.117647	0.207207	0.102941
D07082	0.232877	0.178121	0.171429	0.171429	0.123077	0.171053	0.137931	0.15942	0.150685	0.16129	0.230769	0	0.151515	0.230769	0.296875	0.264706	0.164384	0.264706	0.194444	0.217391	0.217391	0.128818	0.128818	0.131868	0.131868	0.208955	0.153846	0.138889	0.289474	0.155844	0.155844	0.236842	0.207317	0.070175	0.097561	0	0.355932	0.02069	0.186667	0.181818	0.142857	0.17284	0.233766	0.185372	0.1	1	0.164384	0.131579	0.924528
D07086	0.131148	0.105263	0.22	0.22	0.130435	0.214286	0.184211	0.255319	0.235294	0.133333	0.153846	0.095238	0.170213	0.153846	0.192308	0.181818	0.185185	0.181818	0.181818	0.235294	0.235294	0.122807	0.122807	0.205882	0.205882	0.2	0.189655	0.237323	0.222222	0.259259	0.259259	0.237288	0.2	0	0.131148	0.075	0.134615	0.007937	0.214286	0.346154	0.155172	0.233333	0.15625	0.140625	0.117647	0.164384	1	0.226415	0.173913
D07143	0.111111	0.066667	0.127273	0.127273	0.12766	0.232143	0.121951	0.176471	0.163636	0.155556	0.085714	0.044776	0.12	0.085714	0.166667	0.157895	0.181818	0.157895	0.222222	0.185185	0.185185	0.160714	0.160714	0.185714	0.185714	0.196078	0.186441	0.135531	0.181818	0.131148	0.131148	0.193548	0.144928	0.078947	0.320755	0.157895	0.176471	0.015873	0.725	0.20339	0.333333	0.415094	0.086957	0.193548	0.207207	0.131579	0.226415	1	0.138889
D07144	0.246377	0.12202	0.181818	0.181818	0.131148	0.180556	0.148148	0.169231	0.15942	0.172414	0.243243	0	0.16129	0.243243	0.316667	0.28125	0.173913	0.28125	0.205882	0.230769	0.230769	0.136045	0.136045	0.137931	0.137931	0.222222	0.162162	0.147059	0.236842	0.164384	0.164384	0.25	0.217949	0.075472	0.102564	0	0.288136	0	0.197183	0.191781	0.105263	0.181818	0.246575	0.195219	0.102941	0.924528	0.173913	0.138889	1
D07510	0.009091	0.029412	0.019802	0.019802	0.010753	0.018519	0.011628	0	0	0.021978	0.017391	0.009091	0.031915	0.017391	0.019608	0.019048	0.019231	0.019048	0.038835	0.029412	0.029412	0.019231	0.019231	0.050847	0.050847	0.02	0.027778	0.061856	0.04386	0.028037	0.028037	0.017699	0.025641	0.025	0.057143	0.049383	0.030612	0.495575	0.028037	0.009009	0.058252	0.06422	0.017544	0.017699	0.060606	0.03252	0.039216	0.04902	0.008197
D08004	0.090909	0.08	0.083333	0.083333	0.075	0.072727	0.125	0.162791	0.148936	0.235294	0.064516	0	0.095238	0.064516	0.232558	0.142857	0.145833	0.142857	0.166667	0.173913	0.173913	0.1	0.1	0.073529	0.073529	0.186047	0.071429	0.069959	0.096774	0.072727	0.072727	0.103448	0.061538	0.148148	0.176471	0	0.851852	0	0.255319	0.109091	0.208333	0.140351	0.065574	0.103448	0.097345	0.288136	0.145833	0.191489	0.309091
D08656	0.241379	0.157895	0.254902	0.254902	0.145833	0.224138	0.170732	0.252525	0.233645	0.102041	0.293532	0	0.183673	0.293532	0.326531	0.36	0.149228	0.36	0.307692	0.269231	0.269231	0.207207	0.207207	0.103896	0.103896	0.285714	0.16129	0.163636	0.311475	0.177446	0.177446	0.333333	0.265625	0.04878	0.125	0.045455	0.107143	0.015625	0.126984	0.258621	0.09375	0.184615	0.235955	0.225806	0.088	0.239437	0.175439	0.172414	0.253731
D08873	0.245614	0.154529	0.235294	0.235294	0.148936	0.25	0.175	0.196078	0.181818	0.177778	0.241935	0	0.212766	0.241935	0.391304	0.395833	0.112985	0.395833	0.240741	0.413043	0.413043	0.172291	0.172291	0.183099	0.183099	0.265306	0.183333	0.235294	0.338983	0.243339	0.243339	0.363636	0.311475	0	0.092308	0	0.12963	0.007813	0.186441	0.263158	0.131148	0.1875	0.326353	0.229508	0.08871	0.26087	0.222222	0.196429	0.276923
D08913	0.275862	0.166381	0.21547	0.21547	0.096154	0.303571	0.162791	0.185185	0.172414	0.191489	0.263823	0.027778	0.22449	0.263823	0.313725	0.296296	0.189655	0.296296	0.22807	0.283019	0.283019	0.163575	0.163575	0.16	0.16	0.25	0.227197	0.222222	0.28125	0.210614	0.210614	0.3	0.276923	0	0.15625	0.043478	0.103448	0.015385	0.237288	0.25	0.2	0.234375	0.30363	0.164179	0.140496	0.25	0.232143	0.25	0.264706
D09546	0.184388	0.15493	0.19403	0.19403	0.109375	0.242857	0.103448	0.181818	0.171429	0.129032	0.175	0.035294	0.15625	0.175	0.191176	0.217391	0.185714	0.217391	0.166667	0.242424	0.242424	0.106667	0.106667	0.216867	0.216867	0.179104	0.257143	0.212121	0.315068	0.255411	0.255411	0.277778	0.25974	0	0.136951	0.068966	0.130435	0.035461	0.191781	0.253521	0.178082	0.256757	0.177215	0.194805	0.160305	0.209302	0.238806	0.2	0.176471
D09707	0.293103	0.144279	0.218182	0.218182	0.16	0.213115	0.186047	0.203704	0.189655	0.14	0.285714	0	0.196078	0.285714	0.307692	0.339623	0.186441	0.339623	0.290909	0.277778	0.277778	0.200686	0.200686	0.142857	0.142857	0.269231	0.190476	0.175439	0.276923	0.193548	0.193548	0.295082	0.253731	0.095238	0.171875	0.042553	0.181818	0.015267	0.15625	0.225806	0.140625	0.269841	0.290323	0.288744	0.112	0.596491	0.206897	0.245614	0.641509
D09710	0.144131	0.059701	0.189655	0.189655	0.132075	0.245902	0.104167	0.116667	0.109375	0.134615	0.136986	0.040541	0.105263	0.136986	0.129032	0.15873	0.180328	0.15873	0.106061	0.20339	0.20339	0.074627	0.074627	0.25	0.25	0.114754	0.283333	0.210526	0.197183	0.225806	0.225806	0.208955	0.211268	0	0.149254	0.085106	0.063492	0.015038	0.1875	0.181818	0.136364	0.205882	0.15493	0.157143	0.155738	0.120482	0.2	0.196721	0.126582
D09765	0.184615	0.139647	0.169492	0.169492	0.132075	0.169231	0.104167	0.155172	0.145161	0.072727	0.121622	0.084507	0.188679	0.121622	0.206897	0.140625	0.180328	0.140625	0.15873	0.126984	0.126984	0.133858	0.133858	0.195219	0.195219	0.172414	0.149254	0.169492	0.133333	0.134328	0.134328	0.140845	0.162162	0	0.149254	0.085106	0.135593	0.038462	0.1875	0.130435	0.086957	0.200586	0.123288	0.157143	0.101563	0.1625	0.180328	0.123077	0.171053
D09766	0.173913	0.184834	0.15873	0.15873	0.122807	0.15942	0.096154	0.145161	0.136364	0.067797	0.115385	0.08	0.175439	0.115385	0.193548	0.132353	0.169231	0.132353	0.149254	0.119403	0.119403	0.125926	0.125926	0.185372	0.185372	0.16129	0.140845	0.15873	0.171053	0.126761	0.126761	0.133333	0.153846	0	0.140845	0.078431	0.183333	0.061069	0.176471	0.123288	0.144928	0.189488	0.116883	0.148649	0.098485	0.197531	0.169231	0.115942	0.1625
D09817	0.183261	0.112738	0.174603	0.174603	0.160714	0.265625	0.115385	0.19403	0.18196	0.163636	0.205479	0.012346	0.192982	0.205479	0.293103	0.322034	0.166667	0.322034	0.278689	0.310345	0.310345	0.21643	0.21643	0.17284	0.17284	0.258621	0.205882	0.15625	0.363636	0.265625	0.265625	0.387097	0.246575	0.039216	0.15493	0.076923	0.090909	0.037037	0.191176	0.383333	0.142857	0.242857	0.20332	0.228571	0.140625	0.180723	0.262295	0.238095	0.189873
D09866	0.125541	0.119751	0.166667	0.166667	0.109091	0.203125	0.125	0.186736	0.174551	0.071429	0.130552	0.012987	0.107266	0.130552	0.104199	0.116139	0.17175	0.116139	0.116139	0.16129	0.16129	0.177419	0.177419	0.197368	0.197368	0.125612	0.181818	0.186441	0.178082	0.222222	0.222222	0.188406	0.191781	0	0.098592	0.04	0.07425	0.022556	0.122449	0.22291	0.070423	0.14011	0.152778	0.188406	0.075758	0.115065	0.210614	0.111111	0.120797
D09867	0.125541	0.119751	0.166667	0.166667	0.109091	0.203125	0.125	0.186736	0.174551	0.071429	0.130552	0.012987	0.107266	0.130552	0.104199	0.116139	0.17175	0.116139	0.116139	0.16129	0.16129	0.177419	0.177419	0.197368	0.197368	0.125612	0.181818	0.186441	0.178082	0.222222	0.222222	0.188406	0.191781	0	0.098592	0.04	0.07425	0.022556	0.122449	0.22291	0.070423	0.14011	0.152778	0.188406	0.075758	0.115065	0.210614	0.111111	0.120797
D09923	0.180328	0.137931	0.178637	0.178637	0.170213	0.290909	0.170732	0.24	0.222222	0.102041	0.147059	0.058824	0.226216	0.147059	0.140351	0.133333	0.211573	0.133333	0.152542	0.137931	0.137931	0.196429	0.196429	0.214286	0.214286	0.145455	0.220339	0.185185	0.212121	0.197302	0.197302	0.225806	0.208955	0	0.285714	0.095238	0.087719	0	0.245614	0.280702	0.186441	0.350877	0.149254	0.169231	0.133333	0.128205	0.288462	0.259259	0.135135
D10418	0.12037	0.095238	0.141414	0.141414	0.072165	0.142857	0.089888	0.088235	0.084906	0.144444	0.175926	0	0.114583	0.175926	0.14	0.158416	0.084112	0.158416	0.114286	0.161616	0.161616	0.171717	0.171717	0.098361	0.098361	0.12	0.09009	0.107843	0.162162	0.111111	0.111111	0.168224	0.171171	0.045455	0.09009	0.010638	0.067308	0.005618	0.081081	0.12963	0.133333	0.125	0.166667	0.126126	0.233333	0.161017	0.084112	0.083333	0.166667
D10471	0	0.032	0	0	0	0	0	0	0	0	0	0	0	0	0	0	0.007752	0	0.015504	0.007813	0.007813	0.048387	0.048387	0.02069	0.02069	0	0	0.024194	0.021429	0	0	0	0	0.019231	0.022727	0.038095	0.02459	0.621849	0	0.007407	0.023077	0.021898	0	0.014599	0.025773	0.02027	0.007752	0.015504	0
D00505	0.133333	0.216216	0.131579	0.131579	0.096774	0.111111	0.125	0.138889	0.125	0.269231	0.075472	0	0.193548	0.075472	0.157895	0.119048	0.121951	0.119048	0.146341	0.153846	0.153846	0.121951	0.121951	0.04918	0.04918	0.166667	0.0625	0.041162	0.156863	0.103753	0.103753	0.1	0.071429	0.047619	0.108696	0	0.28125	0.028302	0.136364	0.083333	0.324324	0.12	0.076923	0.078431	0.055046	0.135593	0.121951	0.146341	0.086207
D00707	0.041162	0.048159	0.060606	0.060606	0.04	0.068702	0.117647	0.064516	0.057143	0.086957	0.065217	0	0.062271	0.065217	0.090909	0.083333	0.055556	0.083333	0.054054	0.057143	0.057143	0.055556	0.055556	0.037037	0.037037	0.0625	0.075	0.09375	0.0625	0.076923	0.076923	0.068182	0.061224	0	0.02381	0	0.064516	0	0.05	0.047619	0.051282	0.036717	0.043478	0.037528	0.009434	0.035088	0.055556	0.054054	0.037736
D00785	0.133333	0.125	0.162162	0.162162	0.096774	0.111111	0.125	0.138889	0.125	0.222222	0.075472	0.02	0.193548	0.075472	0.128205	0.119048	0.121951	0.119048	0.146341	0.153846	0.153846	0.095238	0.095238	0.066667	0.066667	0.135135	0.0625	0.041162	0.092593	0.079914	0.079914	0.1	0.090909	0	0.085106	0	0.108108	0	0.111111	0.083333	0.195122	0.142857	0.12	0.122449	0.055046	0.080645	0.095238	0.119048	0.086207
D00826	0.22807	0.205074	0.115619	0.115619	0.069767	0.163227	0.104816	0.120507	0.111111	0.153846	0.131148	0.032787	0.25641	0.131148	0.166667	0.156863	0.130604	0.156863	0.156863	0.163265	0.163265	0.09434	0.09434	0.107872	0.107872	0.173913	0.099476	0.086957	0.183333	0.082024	0.082024	0.135593	0.137441	0	0.119005	0.10119	0.152174	0.043103	0.121157	0.142857	0.22	0.174439	0.114754	0.116667	0.101474	0.161765	0.137255	0.128107	0.119403
D01097	0.111111	0.073171	0.235294	0.235294	0.178571	0.113636	0.3	0.142857	0.128205	0.230769	0.142857	0	0.16129	0.142857	0.194444	0.179487	0.125	0.179487	0.179487	0.222222	0.222222	0.125	0.125	0.125	0.125	0.205882	0.162791	0.2	0.137255	0.195122	0.195122	0.148936	0.134615	0.105263	0.136364	0.043478	0.176471	0	0.166667	0.133333	0.142857	0.145833	0.145833	0.08	0.055556	0.118644	0.216216	0.179487	0.127273
D01304	0.174089	0.268293	0.162791	0.162791	0.078947	0.14	0.133333	0.170732	0.155556	0.176471	0.114983	0	0.242938	0.114983	0.159091	0.148936	0.152174	0.148936	0.118012	0.155556	0.155556	0.204545	0.204545	0.109375	0.109375	0.13164	0.09434	0.128668	0.178571	0.117647	0.117647	0.127273	0.116667	0	0.054545	0	0.170732	0.045045	0.075472	0.156863	0.191489	0.145455	0.125	0.148148	0.051724	0.15625	0.12766	0.08	0.104101
D01888	0.12766	0.119048	0.184211	0.184211	0.125	0.155556	0.26087	0.162162	0.146341	0.129032	0.113208	0.019231	0.114286	0.113208	0.121951	0.113636	0.116279	0.113636	0.166667	0.146341	0.146341	0.170732	0.170732	0.118644	0.118644	0.157895	0.081633	0.125	0.109091	0.106383	0.106383	0.117647	0.107143	0.043478	0.152174	0	0.131579	0	0.130435	0.08	0.133333	0.16	0.137255	0.117647	0.063636	0.112903	0.142857	0.139535	0.12069
D02559	0.104167	0.119048	0.153846	0.153846	0.125	0.106383	0.16	0.088608	0.08046	0.129032	0.092593	0.081633	0.181818	0.092593	0.095238	0.088889	0.170732	0.088889	0.088889	0.093023	0.093023	0.090909	0.090909	0.118644	0.118644	0.1	0.12766	0.145038	0.109091	0.181818	0.181818	0.117647	0.121157	0	0.104167	0.08	0.102564	0.009091	0.106383	0.125	0.108696	0.16	0.074074	0.14	0.063636	0.061538	0.333333	0.113636	0.065574
D02560	0.163265	0.159091	0.166667	0.166667	0.176471	0.183932	0.178571	0.236842	0.214286	0.054054	0.09375	0.036364	0.116883	0.09375	0.103753	0.097308	0.181818	0.097308	0.104167	0.159091	0.159091	0.209302	0.209302	0.186441	0.186441	0.116279	0.1875	0.225	0.13438	0.166667	0.166667	0.144465	0.151832	0	0.163265	0.148148	0.08545	0.008772	0.15942	0.183673	0.078431	0.148148	0.148148	0.150943	0.052174	0.084695	0.147903	0.169978	0.090047
D02561	0.098039	0.086957	0.2	0.2	0.181818	0.222222	0.28	0.210526	0.190476	0.225806	0.127273	0.018182	0.166667	0.127273	0.225	0.209302	0.186047	0.209302	0.209302	0.25	0.25	0.108696	0.108696	0.210526	0.210526	0.236842	0.191489	0.191067	0.28	0.309524	0.309524	0.304348	0.203704	0.038462	0.166667	0.071429	0.210526	0	0.27907	0.212766	0.2	0.22	0.12963	0.111111	0.090909	0.125	0.342105	0.3	0.133333
D02562	0.122449	0.25641	0.093023	0.093023	0.151515	0.173913	0.148148	0.153846	0.139535	0.121212	0.089286	0.018519	0.108108	0.089286	0.170732	0.159091	0.162791	0.159091	0.159091	0.166667	0.166667	0.111111	0.111111	0.114754	0.114754	0.179487	0.1	0.093023	0.188679	0.102041	0.102041	0.113208	0.103448	0	0.145833	0.074074	0.25	0.036697	0.148936	0.098039	0.232558	0.176471	0.071429	0.092593	0.081818	0.145161	0.136364	0.159091	0.080645
D02563	0.107143	0.098039	0.102041	0.102041	0.071429	0.089286	0.117647	0.130435	0.12	0.128205	0.114754	0.068966	0.090909	0.114754	0.122449	0.115385	0.14	0.115385	0.16	0.191489	0.191489	0.117647	0.117647	0.119403	0.119403	0.152174	0.107143	0.134454	0.111111	0.109091	0.109091	0.118644	0.145161	0.03125	0.107143	0.058824	0.155556	0.025641	0.12963	0.166667	0.132075	0.155172	0.116667	0.1	0.067797	0.098592	0.325581	0.137255	0.104478
D02564	0.139535	0.131579	0.138889	0.138889	0.103448	0.116279	0.136364	0.147059	0.131579	0.24	0.078431	0	0.206897	0.078431	0.135135	0.125	0.128205	0.125	0.125	0.162162	0.162162	0.1	0.1	0.050847	0.050847	0.142857	0.065217	0.043257	0.096154	0.083521	0.083521	0.104167	0.09434	0	0.065217	0	0.114286	0	0.116279	0.086957	0.175	0.125	0.125	0.12766	0.046296	0.083333	0.1	0.125	0.089286
D02579	0.086957	0.073171	0.166667	0.166667	0.137931	0.088889	0.238095	0.111111	0.1	0.230769	0.142857	0.041667	0.2	0.142857	0.194444	0.179487	0.097561	0.179487	0.179487	0.189189	0.189189	0.071429	0.071429	0.166667	0.166667	0.171429	0.111111	0.126005	0.137255	0.113636	0.113636	0.148936	0.134615	0	0.086957	0	0.111111	0	0.166667	0.108696	0.170732	0.145833	0.122449	0.058824	0.055556	0.1	0.153846	0.179487	0.107143
D02580	0.195652	0.195122	0.27027	0.27027	0.151515	0.173913	0.24	0.206434	0.186441	0.275862	0.173077	0	0.322581	0.173077	0.263158	0.243902	0.219512	0.243902	0.243902	0.25641	0.25641	0.128668	0.128668	0.114754	0.114754	0.277778	0.122449	0.166253	0.188679	0.192053	0.192053	0.204082	0.163636	0	0.1	0	0.125	0	0.148936	0.166667	0.204545	0.176471	0.2	0.106942	0.072072	0.145161	0.190476	0.159091	0.155172
D02581	0.185185	0.176471	0.209503	0.209503	0.093023	0.188679	0.111111	0.213483	0.195876	0.095238	0.129032	0.066667	0.25	0.129032	0.23913	0.2	0.204082	0.2	0.2	0.26087	0.26087	0.191919	0.191919	0.132353	0.132353	0.222222	0.122807	0.176471	0.180328	0.145455	0.145455	0.192982	0.17175	0	0.084746	0.055556	0.125	0.02521	0.125	0.25	0.107143	0.189655	0.131148	0.192982	0.084746	0.142857	0.372093	0.132075	0.151515
D03239	0.142857	0.123288	0.106501	0.106501	0.075758	0.175676	0.103448	0.164179	0.15493	0.060606	0.119048	0.023256	0.104478	0.119048	0.157143	0.12	0.164095	0.12	0.183099	0.15493	0.15493	0.185714	0.185714	0.16092	0.16092	0.128571	0.113924	0.111111	0.142857	0.111111	0.111111	0.15	0.182927	0.035088	0.142857	0.107143	0.164179	0.042857	0.175676	0.141026	0.088608	0.192308	0.177215	0.194805	0.125926	0.195402	0.136986	0.166667	0.204819
D03248	0.125	0.116279	0.15	0.15	0.121212	0.12766	0.25	0.128205	0.116279	0.16129	0.111111	0	0.111111	0.111111	0.093023	0.086957	0.113636	0.086957	0.111111	0.230769	0.230769	0.166667	0.166667	0.098361	0.098361	0.125	0.08	0.179487	0.107143	0.12766	0.12766	0.115385	0.125	0.086957	0.125	0	0.157895	0.009009	0.081633	0.1	0.106383	0.134615	0.18	0.16	0.053571	0.147541	0.113636	0.086957	0.157895
D03409	0.104167	0.146341	0.125	0.125	0.2	0.181818	0.26087	0.102564	0.093023	0.206897	0.113208	0.039216	0.147059	0.113208	0.179487	0.166667	0.116279	0.166667	0.166667	0.175	0.175	0.090909	0.090909	0.118644	0.118644	0.189189	0.104167	0.097561	0.150943	0.155556	0.155556	0.163265	0.127273	0	0.12766	0	0.102564	0	0.130435	0.148936	0.133333	0.183673	0.09434	0.096154	0.093458	0.078125	0.230769	0.139535	0.083333
D03731	0.133333	0.125	0.162162	0.162162	0.096774	0.111111	0.125	0.138889	0.125	0.222222	0.075472	0.02	0.193548	0.075472	0.128205	0.119048	0.121951	0.119048	0.146341	0.153846	0.153846	0.095238	0.095238	0.066667	0.066667	0.135135	0.0625	0.041162	0.092593	0.079914	0.079914	0.1	0.090909	0	0.085106	0	0.108108	0	0.111111	0.083333	0.195122	0.142857	0.12	0.122449	0.055046	0.080645	0.095238	0.119048	0.086207
D03733	0.108696	0.097561	0.194444	0.194444	0.096774	0.136364	0.227273	0.205882	0.184211	0.178571	0.075472	0	0.121212	0.075472	0.189189	0.175	0.121951	0.175	0.175	0.184211	0.184211	0.121951	0.121951	0.066667	0.066667	0.2	0.085106	0.094148	0.134615	0.111111	0.111111	0.145833	0.090909	0.1	0.085106	0.041667	0.205882	0	0.162791	0.130435	0.113636	0.098039	0.098039	0.078431	0.045455	0.116667	0.15	0.175	0.125
D04092	0.122449	0.195122	0.205128	0.205128	0.1875	0.173913	0.148148	0.153846	0.139535	0.121212	0.109091	0	0.138889	0.109091	0.2	0.186047	0.162791	0.186047	0.275	0.195122	0.195122	0.162791	0.162791	0.096774	0.096774	0.243243	0.078431	0.093023	0.125	0.102041	0.102041	0.134615	0.103448	0.083333	0.170213	0.074074	0.125	0.018018	0.102041	0.098039	0.12766	0.2	0.111111	0.156863	0.122642	0.109375	0.111111	0.133333	0.116667
D04681	0.111111	0.073171	0.235294	0.235294	0.178571	0.113636	0.3	0.142857	0.128205	0.230769	0.142857	0	0.16129	0.142857	0.194444	0.179487	0.125	0.179487	0.179487	0.222222	0.222222	0.125	0.125	0.125	0.125	0.205882	0.162791	0.2	0.137255	0.195122	0.195122	0.148936	0.134615	0.105263	0.136364	0.043478	0.176471	0	0.166667	0.133333	0.142857	0.145833	0.145833	0.08	0.055556	0.118644	0.216216	0.179487	0.127273
D05033	0	0	0.027027	0.027027	0.074074	0.022727	0.1	0.028571	0.025641	0.217391	0.019608	0	0.032258	0.019608	0.054054	0.05	0.078947	0.05	0.105263	0.081081	0.081081	0.025	0.025	0.035088	0.035088	0.121212	0.022222	0.027027	0.018868	0.046512	0.046512	0.020408	0.018519	0.214286	0.095238	0	0.125	0	0.071429	0.044444	0.1	0.0625	0.02	0	0.047619	0.107143	0.051282	0.05	0.115385
D07337	0.2	0.141649	0.238095	0.238095	0.131579	0.18	0.16129	0.190476	0.173913	0.4	0.2	0	0.314286	0.2	0.325	0.302326	0.214128	0.302326	0.272727	0.35	0.35	0.145833	0.145833	0.106061	0.106061	0.307692	0.111111	0.140351	0.214286	0.172962	0.172962	0.230769	0.189655	0.033333	0.111111	0	0.136364	0	0.204082	0.173077	0.26087	0.226415	0.181818	0.122807	0.107143	0.1875	0.195652	0.217391	0.2
D07338	0.104167	0.093023	0.184211	0.184211	0.125	0.130435	0.26087	0.162162	0.146341	0.25	0.113208	0.039216	0.181818	0.113208	0.210526	0.195122	0.090909	0.195122	0.225	0.27027	0.27027	0.116279	0.116279	0.137931	0.137931	0.222222	0.104167	0.184211	0.150943	0.130435	0.130435	0.163265	0.107143	0	0.104167	0	0.162162	0.009091	0.209302	0.173913	0.159091	0.183673	0.137255	0.096154	0.073394	0.112903	0.2	0.225	0.12069
D08085	0.08	0.066667	0.15	0.15	0.121212	0.081633	0.2	0.1	0.2	0.2	0.132075	0.038462	0.176471	0.132075	0.175	0.162791	0.088889	0.162791	0.162791	0.170732	0.170732	0.065217	0.065217	0.155172	0.155172	0.153846	0.102041	0.113801	0.127273	0.104167	0.104167	0.137255	0.125	0	0.08	0	0.1	0	0.152174	0.1	0.155556	0.134615	0.113208	0.054545	0.053571	0.09375	0.139535	0.162791	0.1
D08349	0.146341	0.138889	0.147059	0.147059	0.111111	0.121951	0.15	0.15625	0.138889	0.318182	0.081633	0	0.222222	0.081633	0.176471	0.131579	0.135135	0.131579	0.162162	0.171429	0.171429	0.135135	0.135135	0.052632	0.052632	0.1875	0.068182	0.045576	0.1	0.113801	0.113801	0.108696	0.076923	0.058824	0.119048	0	0.193548	0	0.15	0.090909	0.216216	0.130435	0.083333	0.085106	0.057143	0.086207	0.135135	0.162162	0.092593
D08392	0.1875	0.133333	0.139535	0.139535	0.176471	0.217391	0.222222	0.236842	0.214286	0.083333	0.125	0.055556	0.102564	0.125	0.111111	0.104167	0.209302	0.104167	0.12766	0.133333	0.133333	0.155556	0.155556	0.166667	0.166667	0.142857	0.266667	0.225	0.160714	0.142857	0.142857	0.173077	0.157895	0	0.163265	0.107143	0.093023	0	0.166667	0.234043	0.122449	0.192308	0.148148	0.150943	0.070796	0.123077	0.130435	0.177778	0.131148
D08393	0.1875	0.133333	0.139535	0.139535	0.176471	0.217391	0.222222	0.236842	0.214286	0.083333	0.125	0.055556	0.102564	0.125	0.111111	0.104167	0.209302	0.104167	0.12766	0.133333	0.133333	0.155556	0.155556	0.166667	0.166667	0.142857	0.266667	0.225	0.160714	0.142857	0.142857	0.173077	0.157895	0	0.163265	0.107143	0.093023	0	0.166667	0.234043	0.122449	0.192308	0.148148	0.150943	0.070796	0.123077	0.130435	0.177778	0.131148
D08453	0.139535	0.131579	0.138889	0.138889	0.103448	0.116279	0.136364	0.147059	0.131579	0.24	0.078431	0	0.206897	0.078431	0.135135	0.125	0.128205	0.125	0.125	0.162162	0.162162	0.1	0.1	0.050847	0.050847	0.142857	0.065217	0.043257	0.096154	0.083521	0.083521	0.104167	0.09434	0	0.065217	0	0.114286	0	0.116279	0.086957	0.175	0.125	0.125	0.12766	0.046296	0.083333	0.1	0.125	0.089286
D08469	0.133333	0.153846	0.102564	0.102564	0.172414	0.190476	0.173913	0.171429	0.153846	0.137931	0.096154	0.02	0.121212	0.096154	0.189189	0.175	0.179487	0.175	0.175	0.184211	0.184211	0.121951	0.121951	0.122807	0.122807	0.2	0.108696	0.102564	0.113208	0.111111	0.111111	0.122449	0.111111	0	0.159091	0.086957	0.138889	0.009259	0.162791	0.106383	0.166667	0.191489	0.076923	0.1	0.084906	0.080645	0.15	0.175	0.086207
D08625	0.191067	0.135135	0.111111	0.111111	0.107143	0.138015	0.142857	0.117647	0.105263	0.25	0.08	0.021277	0.214286	0.08	0.108108	0.1	0.131579	0.1	0.1	0.105263	0.105263	0.075	0.075	0.083481	0.083481	0.114286	0.108545	0.072386	0.076923	0.08545	0.08545	0.083333	0.111111	0	0.108545	0.083744	0.117647	0.009524	0.138015	0.088889	0.179487	0.144708	0.081633	0.083333	0.066667	0.066667	0.131579	0.148825	0.071429
D00752	0.060606	0.066667	0.068966	0.068966	0.06	0.15	0.022222	0.111111	0.103448	0.04	0.041096	0.044776	0	0.041096	0.086207	0.047619	0.101695	0.047619	0.1	0.084746	0.084746	0.101695	0.101695	0.121622	0.121622	0.109091	0.147541	0.107143	0.114286	0.15	0.15	0.121212	0.112676	0.051282	0.09375	0.047619	0.090909	0.007874	0.131148	0.126984	0.0625	0.056338	0.056338	0.121212	0.063492	0.088608	0.101695	0.064516	0.093333
D01206	0.176471	0.148936	0.181818	0.181818	0.162162	0.156863	0.2	0.136364	0.125	0.076923	0.157895	0.034483	0.095238	0.157895	0.104167	0.142857	0.122449	0.142857	0.191489	0.148936	0.148936	0.222222	0.222222	0.177419	0.177419	0.133333	0.132075	0.209302	0.152542	0.156863	0.156863	0.163636	0.15	0.068966	0.132075	0.0625	0.086957	0.026087	0.072727	0.12963	0.074074	0.160714	0.140351	0.207547	0.068966	0.101449	0.122449	0.12	0.107692
D01846	0.095238	0.142857	0.117647	0.117647	0.16	0.153846	0.294118	0.125	0.111111	0.064639	0.083333	0	0.09215	0.083333	0.083333	0.076923	0.078947	0.076923	0.105263	0.081081	0.081081	0.108108	0.108108	0.072727	0.072727	0.121212	0.069767	0.151515	0.08	0.097561	0.097561	0.086957	0.078431	0	0.069767	0	0.081081	0	0.06383	0.060948	0.040189	0.085106	0.085106	0.086957	0.028037	0.068966	0.099196	0.068702	0.074074
D02365	0.113636	0.075	0.078947	0.078947	0.185185	0.116279	0.086957	0.083333	0.075	0.033333	0.122449	0	0.029412	0.122449	0.05	0.153846	0.128205	0.153846	0.097561	0.075	0.075	0.047619	0.047619	0.087719	0.087719	0.111111	0.139535	0.108108	0.117647	0.142857	0.142857	0.12766	0.115385	0	0.042553	0	0.026316	0	0.021277	0.06383	0.021739	0.038462	0.102041	0.104167	0.018018	0.083333	0.023256	0.022727	0.089286
D03998	0.044444	0.108108	0.054054	0.054054	0.153846	0.095238	0.095238	0.121212	0.108108	0.035714	0.039216	0	0.03125	0.039216	0.052632	0.04878	0.05	0.04878	0.102564	0.051282	0.051282	0.05	0.05	0.034483	0.034483	0.117647	0.068182	0.054054	0.037736	0.045455	0.045455	0.040816	0.037037	0	0.044444	0	0.027778	0	0.022222	0.021277	0.022727	0.04	0.04	0.040816	0.018349	0.032787	0.02439	0.02381	0.035088
D04936	0.237288	0.175439	0.3	0.3	0.12	0.241379	0.166667	0.235294	0.218182	0.145833	0.253968	0.028169	0.255319	0.253968	0.395349	0.319312	0.229656	0.319312	0.254545	0.240741	0.240741	0.236364	0.236364	0.228571	0.228571	0.28	0.196721	0.3	0.285714	0.2	0.2	0.305085	0.316212	0	0.140625	0.068182	0.125	0.007692	0.2	0.193548	0.145161	0.2	0.232227	0.222222	0.104839	0.219178	0.214286	0.169492	0.231884
D05094	0.060606	0.066667	0.068966	0.068966	0.06	0.15	0.022222	0.111111	0.103448	0.04	0.041096	0.044776	0	0.041096	0.086207	0.047619	0.101695	0.047619	0.1	0.084746	0.084746	0.101695	0.101695	0.121622	0.121622	0.109091	0.147541	0.107143	0.114286	0.15	0.15	0.121212	0.112676	0.051282	0.09375	0.047619	0.090909	0.007874	0.131148	0.126984	0.0625	0.056338	0.056338	0.121212	0.063492	0.088608	0.101695	0.064516	0.093333
D05095	0.070175	0.078431	0.081633	0.081633	0.047619	0.090909	0.027778	0.133333	0.122449	0.02381	0.046875	0.033898	0	0.046875	0.038462	0.055556	0.056604	0.055556	0.163265	0.1	0.1	0.191489	0.191489	0.057143	0.057143	0.130435	0.089286	0.081633	0.061538	0.071429	0.071429	0.065574	0.076923	0.142857	0.109091	0.060606	0.02	0.025862	0.016949	0.087719	0.035088	0.064516	0.064516	0.160714	0.05042	0.040541	0.037037	0.075472	0.042857
D00709	0	0	0.051282	0.051282	0.142857	0.066667	0.086957	0.054054	0.04878	0.033333	0.018519	0.065217	0.029412	0.018519	0.02439	0.022727	0.1	0.022727	0.022727	0.02381	0.02381	0	0	0.087719	0.087719	0.025641	0.065217	0.051282	0.055556	0.066667	0.066667	0.06	0.054545	0	0.113636	0.045455	0.026316	0	0.116279	0.162791	0.146341	0.125	0.018868	0.039216	0.056075	0.031746	0.157895	0.097561	0.033898
D01029	0.114754	0.068966	0.132075	0.132075	0.108696	0.135593	0.1	0.183673	0.169811	0.190476	0.057143	0.030303	0.148936	0.057143	0.12963	0.122807	0.211538	0.122807	0.207547	0.169811	0.169811	0.188679	0.188679	0.125	0.125	0.156863	0.133333	0.147228	0.134328	0.098361	0.098361	0.142857	0.115942	0.147059	0.283019	0.2	0.208333	0.041322	0.240741	0.15	0.2	0.280702	0.057971	0.125	0.137931	0.150685	0.166667	0.28	0.15942
D01914	0	0	0.026316	0.026316	0.153846	0.069767	0.095238	0.057143	0.051282	0.074074	0.019231	0.068182	0.03125	0.019231	0.025641	0.02381	0.076923	0.02381	0.02381	0.025	0.025	0	0	0.090909	0.090909	0.027027	0.068182	0.054054	0.078431	0.095238	0.095238	0.085106	0.076923	0	0.068182	0.05	0	0	0.069767	0.170732	0.097561	0.106383	0.019608	0.040816	0.04717	0.016129	0.166667	0.075	0.017241
D03497	0.081081	0.072464	0.074627	0.074627	0.067797	0.067568	0.056604	0.129032	0.121212	0.148148	0.04878	0.25	0.1	0.04878	0.089552	0.070423	0.102941	0.070423	0.151515	0.088235	0.088235	0.102941	0.102941	0.134146	0.134146	0.109375	0.052632	0.054173	0.073171	0.063257	0.063257	0.076923	0.047059	0.108696	0.19403	0.058824	0.166667	0.037594	0.112676	0.109589	0.21875	0.148649	0.049383	0.135135	0.107692	0.078652	0.102941	0.169231	0.082353
D03971	0.095238	0.067797	0.150943	0.150943	0.130435	0.214286	0.097561	0.092593	0.086207	0.214286	0.119403	0.045455	0.122449	0.119403	0.148148	0.140351	0.185185	0.140351	0.140351	0.125	0.125	0.103448	0.103448	0.205882	0.205882	0.111111	0.232143	0.166348	0.166667	0.172414	0.172414	0.177419	0.147059	0.111111	0.294559	0.194444	0.072727	0.024194	0.259259	0.129032	0.313725	0.345455	0.088235	0.140625	0.166667	0.075949	0.163636	0.354167	0.08
D04659	0.177419	0.111111	0.226415	0.226415	0.12	0.285714	0.139535	0.204589	0.190053	0.145833	0.161765	0.028169	0.204082	0.161765	0.269231	0.232143	0.186736	0.232143	0.277778	0.288462	0.288462	0.186736	0.186736	0.162162	0.162162	0.254902	0.177419	0.190476	0.265625	0.214165	0.214165	0.283333	0.242424	0.073171	0.280702	0.146341	0.145455	0.023438	0.309091	0.275862	0.290909	0.392857	0.164179	0.262295	0.181034	0.171053	0.283019	0.4375	0.180556
D04660	0.177419	0.111111	0.226415	0.226415	0.12	0.285714	0.139535	0.204589	0.190053	0.145833	0.161765	0.028169	0.204082	0.161765	0.269231	0.232143	0.186736	0.232143	0.277778	0.288462	0.288462	0.186736	0.186736	0.162162	0.162162	0.254902	0.177419	0.190476	0.265625	0.214165	0.214165	0.283333	0.242424	0.073171	0.280702	0.146341	0.145455	0.023438	0.309091	0.275862	0.290909	0.392857	0.164179	0.262295	0.181034	0.171053	0.283019	0.4375	0.180556
D04785	0.126984	0.083333	0.105263	0.105263	0.173913	0.25	0.205128	0.150943	0.140351	0.081633	0.115942	0.092308	0.096154	0.115942	0.103448	0.098361	0.137931	0.098361	0.116667	0.101695	0.101695	0.157895	0.157895	0.333333	0.333333	0.087719	0.224138	0.166667	0.179104	0.166667	0.166667	0.190476	0.176471	0.076923	0.267857	0.184211	0.070175	0.032	0.22807	0.180328	0.131148	0.266667	0.101449	0.171875	0.153846	0.101266	0.2	0.313725	0.106667
D05267	0.082759	0.046431	0.06201	0.06201	0.037037	0.114286	0.039063	0.086475	0.083991	0.085938	0.089572	0.060811	0.075188	0.089572	0.145038	0.133333	0.093525	0.133333	0.116788	0.118519	0.118519	0.068166	0.068166	0.14094	0.14094	0.104478	0.090278	0.075036	0.145833	0.090909	0.090909	0.15	0.111855	0.032258	0.105634	0.048	0.139535	0.033654	0.164179	0.17037	0.099291	0.148936	0.085064	0.095238	0.181818	0.193103	0.134328	0.167939	0.198582
D05772	0.089552	0.080645	0.12069	0.12069	0.076923	0.090909	0.113636	0.125	0.116667	0.195652	0.082192	0.013889	0.113208	0.082192	0.222222	0.131148	0.133333	0.131148	0.189655	0.155172	0.155172	0.114754	0.114754	0.116883	0.116883	0.163636	0.089552	0.14841	0.109589	0.090909	0.090909	0.115942	0.093333	0.1	0.196721	0.093023	0.3125	0.031496	0.285714	0.104478	0.224138	0.238095	0.083333	0.166667	0.141667	0.236111	0.172414	0.301887	0.25
D05834	0.114754	0.068966	0.153846	0.153846	0.133333	0.196429	0.157895	0.137255	0.127273	0.162791	0.104478	0.046154	0.125	0.104478	0.244898	0.163636	0.166667	0.163636	0.163636	0.215686	0.215686	0.067797	0.067797	0.191176	0.191176	0.156863	0.152542	0.162791	0.206349	0.175439	0.175439	0.220339	0.166667	0	0.214286	0.105263	0.234043	0.008	0.456522	0.169492	0.245283	0.237288	0.106061	0.125	0.128205	0.217391	0.211538	0.361702	0.230769
D06335	0.086207	0.075472	0.170213	0.170213	0.095238	0.107143	0.147059	0.12766	0.117647	0.323529	0.112903	0	0.166667	0.112903	0.244444	0.156863	0.137255	0.156863	0.18	0.23913	0.23913	0.074074	0.074074	0.117647	0.117647	0.2	0.105263	0.115619	0.126984	0.127273	0.127273	0.135593	0.107692	0.030303	0.166667	0	0.325	0	0.377778	0.122807	0.244898	0.214286	0.114754	0.116667	0.114035	0.253968	0.16	0.282609	0.271186
D06590	0.203852	0.15	0.313725	0.313725	0.137255	0.213115	0.133333	0.27451	0.254545	0.117647	0.218045	0	0.196078	0.218045	0.307692	0.267857	0.141925	0.267857	0.339623	0.277778	0.277778	0.320755	0.320755	0.142857	0.142857	0.294118	0.153846	0.175439	0.257576	0.193548	0.193548	0.274194	0.212121	0.045455	0.171875	0.042553	0.12069	0.031008	0.15625	0.225806	0.140625	0.19403	0.204819	0.274194	0.112	0.166667	0.206897	0.183333	0.175676
D06888	0.077778	0.096386	0.126582	0.126582	0.142857	0.185185	0.089552	0.101266	0.096386	0.19697	0.084211	0.021053	0.092105	0.084211	0.139241	0.120482	0.15	0.120482	0.192308	0.166667	0.166667	0.095238	0.095238	0.111111	0.111111	0.173333	0.089888	0.098765	0.117021	0.116279	0.116279	0.122222	0.115789	0.096774	0.25974	0.059701	0.144737	0.013072	0.185185	0.113636	0.319444	0.291139	0.085106	0.147727	0.352941	0.13	0.135802	0.24	0.135417
D08607	0.114754	0.068966	0.132075	0.132075	0.108696	0.135593	0.1	0.183673	0.169811	0.190476	0.057143	0.030303	0.148936	0.057143	0.12963	0.122807	0.211538	0.122807	0.207547	0.169811	0.169811	0.188679	0.188679	0.125	0.125	0.156863	0.133333	0.147228	0.134328	0.098361	0.098361	0.142857	0.115942	0.147059	0.283019	0.2	0.208333	0.041322	0.240741	0.15	0.2	0.280702	0.057971	0.125	0.137931	0.150685	0.166667	0.28	0.15942
D08879	0.04	0	0.047619	0.047619	0.060606	0.0625	0.076923	0.02439	0.022222	0.0625	0.017544	0.061224	0.027027	0.017544	0.022727	0.021277	0.119048	0.021277	0.043478	0.045455	0.045455	0	0	0.12069	0.12069	0.04878	0.061224	0.073171	0.034483	0.0625	0.0625	0.037037	0.070175	0.045455	0.130435	0.130435	0.05	0.009174	0.108696	0.12766	0.136364	0.14	0.017857	0.018182	0.06422	0.0625	0.146341	0.090909	0.066667
D09903	0.078947	0.051231	0.073641	0.073641	0.042553	0.086667	0.052632	0.082221	0.079973	0.106061	0.0625	0.123288	0.094891	0.0625	0.097902	0.088435	0.06497	0.088435	0.118881	0.120567	0.120567	0.06497	0.06497	0.079268	0.079268	0.107143	0.051282	0.066302	0.075	0.056384	0.056384	0.076923	0.067901	0.046512	0.108108	0.029851	0.092199	0.023041	0.108844	0.1	0.125	0.134228	0.062893	0.083871	0.15736	0.104294	0.096552	0.126761	0.106918
D09929	0.047297	0.034722	0.057554	0.057554	0.045455	0.062069	0.039683	0.058394	0.056738	0.122951	0.03871	0.131387	0.06015	0.03871	0.057143	0.048611	0.048951	0.048611	0.078571	0.07971	0.07971	0.048951	0.048951	0.070064	0.070064	0.065693	0.040268	0.047755	0.044872	0.045485	0.045485	0.046053	0.044586	0.05	0.115108	0.032	0.08209	0.024038	0.1	0.061224	0.133333	0.118881	0.038961	0.06	0.15873	0.06875	0.071429	0.118519	0.070513
D10028	0.19697	0.123077	0.290909	0.290909	0.127273	0.21875	0.122449	0.232143	0.216667	0.196078	0.226551	0	0.181818	0.226551	0.358491	0.293103	0.15625	0.293103	0.293103	0.327273	0.327273	0.138462	0.138462	0.121951	0.121951	0.320755	0.179104	0.183333	0.26087	0.232227	0.232227	0.276923	0.205479	0.020408	0.144928	0	0.169492	0	0.21875	0.19403	0.166667	0.2	0.235294	0.185714	0.108527	0.283784	0.193548	0.171875	0.3
D01977	0.245614	0.160714	0.211538	0.211538	0.125	0.296296	0.175	0.22	0.203704	0.12766	0.203125	0.014286	0.133201	0.203125	0.19403	0.196429	0.238274	0.196429	0.155172	0.197053	0.197053	0.245283	0.245283	0.253731	0.253731	0.169811	0.245614	0.285714	0.295082	0.346154	0.346154	0.315789	0.290323	0.05	0.126984	0.046512	0.109091	0.015748	0.111111	0.241379	0.112903	0.134328	0.225806	0.229508	0.08	0.186903	0.208791	0.116667	0.197691
D03252	0.169231	0.129032	0.186736	0.186736	0.113208	0.271186	0.106383	0.18705	0.174497	0.074074	0.15493	0.013333	0.076389	0.15493	0.157718	0.15016	0.197302	0.15016	0.15016	0.174497	0.174497	0.224138	0.224138	0.236111	0.236111	0.163194	0.200632	0.236364	0.30031	0.315789	0.315789	0.320132	0.214286	0.044444	0.117647	0.041667	0.089109	0.015152	0.093294	0.230032	0.083455	0.105048	0.191176	0.25	0.068702	0.145704	0.152597	0.097561	0.153342
D03350	0.233333	0.133333	0.245283	0.245283	0.14	0.303571	0.190476	0.207547	0.192982	0.166667	0.25	0.013699	0.192843	0.25	0.218182	0.272727	0.225577	0.272727	0.206897	0.207815	0.207815	0.189655	0.189655	0.26087	0.26087	0.226415	0.254237	0.346939	0.322581	0.403846	0.403846	0.344828	0.31746	0.046512	0.138462	0.043478	0.103448	0.007634	0.140625	0.229508	0.142857	0.161765	0.253968	0.21875	0.095238	0.2	0.241007	0.147541	0.211268
D04023	0.236364	0.169811	0.176471	0.176471	0.108696	0.155172	0.1	0.234043	0.215686	0.162791	0.193548	0	0.166307	0.193548	0.244898	0.28	0.166667	0.28	0.207547	0.24	0.24	0.26	0.26	0.157143	0.157143	0.229167	0.192982	0.25	0.206349	0.196429	0.196429	0.220339	0.203125	0.054054	0.079365	0	0.16	0.032787	0.098361	0.210526	0.081967	0.101056	0.196721	0.180328	0.064516	0.235294	0.145455	0.103448	0.25
D04024	0.183908	0.154762	0.17284	0.17284	0.061728	0.133333	0.082192	0.148148	0.141176	0.075949	0.238636	0	0.141026	0.238636	0.21519	0.253165	0.139535	0.253165	0.178571	0.168675	0.168675	0.146199	0.146199	0.104762	0.104762	0.189873	0.119565	0.144578	0.275862	0.146067	0.146067	0.244186	0.191489	0.013699	0.072917	0	0.134146	0.059211	0.073684	0.155556	0.10989	0.102041	0.196013	0.188889	0.070513	0.226804	0.113636	0.076087	0.197917
D04025	0.233333	0.122112	0.151832	0.151832	0.096154	0.15873	0.086957	0.178637	0.166381	0.142857	0.244168	0	0.2	0.244168	0.288462	0.296296	0.183533	0.296296	0.22807	0.259259	0.259259	0.183533	0.183533	0.101266	0.101266	0.25	0.104478	0.132075	0.242424	0.135303	0.135303	0.258065	0.238806	0.071429	0.072464	0	0.163636	0.007634	0.106061	0.229508	0.107692	0.112676	0.274194	0.164179	0.069767	0.25	0.15	0.111111	0.264706
D05399	0.220339	0.137931	0.28	0.28	0.122449	0.224138	0.2	0.192308	0.178571	0.125	0.252006	0	0.226216	0.252006	0.226415	0.245421	0.175439	0.245421	0.236364	0.294118	0.294118	0.218182	0.218182	0.180556	0.180556	0.26	0.180328	0.306122	0.219512	0.245614	0.245614	0.233766	0.285714	0	0.074627	0	0.087719	0.007752	0.109375	0.177419	0.076923	0.132353	0.327586	0.245902	0.054264	0.200546	0.163194	0.096774	0.212121
D06068	0.027273	0.009434	0.026393	0.026393	0.032258	0.076923	0.011364	0.009804	0.009434	0.032609	0.008475	0.046296	0.020619	0.008475	0.029126	0.009259	0.069307	0.009259	0.028302	0.019048	0.019048	0.038462	0.038462	0.125	0.125	0.019608	0.066038	0.05	0.034188	0.046729	0.046729	0.035398	0.033898	0	0.093901	0.060976	0.040404	0.036364	0.12	0.065421	0.088235	0.102804	0.008547	0.017391	0.138996	0.040323	0.048544	0.10101	0.041667
D06272	0.188406	0.1875	0.174603	0.174603	0.101695	0.208955	0.16	0.137441	0.129272	0.163636	0.375	0	0.214286	0.375	0.271186	0.322034	0.115942	0.322034	0.21875	0.288136	0.288136	0.149254	0.149254	0.130952	0.130952	0.237288	0.138889	0.213115	0.363636	0.185944	0.185944	0.323077	0.358209	0	0.078947	0	0.142857	0.021898	0.125	0.257576	0.15942	0.16	0.298507	0.178082	0.065693	0.272727	0.184615	0.130435	0.236842
D06407	0.296296	0.163636	0.215686	0.215686	0.12766	0.277778	0.15	0.22449	0.207547	0.061224	0.206349	0.029412	0.11332	0.206349	0.197719	0.2	0.25	0.2	0.137931	0.163636	0.163636	0.25	0.25	0.276923	0.276923	0.150943	0.272727	0.319149	0.3	0.277778	0.277778	0.321429	0.274194	0	0.129032	0.128205	0.071429	0.024	0.131148	0.245614	0.096774	0.171875	0.25	0.254237	0.072	0.15747	0.212687	0.137931	0.16643
D07907	0.236364	0.169811	0.176471	0.176471	0.108696	0.155172	0.1	0.234043	0.215686	0.162791	0.193548	0	0.166307	0.193548	0.244898	0.28	0.166667	0.28	0.207547	0.24	0.24	0.26	0.26	0.157143	0.157143	0.229167	0.192982	0.25	0.206349	0.196429	0.196429	0.220339	0.203125	0.054054	0.079365	0	0.16	0.032787	0.098361	0.210526	0.081967	0.101056	0.196721	0.180328	0.064516	0.235294	0.145455	0.103448	0.25
D08108	0.285714	0.171875	0.237288	0.237288	0.084746	0.176471	0.117647	0.224138	0.209677	0.105263	0.290801	0	0.240741	0.290801	0.254237	0.283333	0.1875	0.283333	0.222222	0.25	0.25	0.235772	0.235772	0.13253	0.13253	0.241379	0.140845	0.177419	0.289855	0.19403	0.19403	0.287879	0.267606	0.019608	0.109589	0	0.109375	0.007246	0.081081	0.171429	0.097222	0.146667	0.27786	0.25	0.08209	0.227848	0.117647	0.084507	0.223684
D08524	0.245614	0.160714	0.235294	0.235294	0.125	0.25	0.205128	0.22	0.203704	0.204545	0.350877	0	0.23913	0.350877	0.325052	0.34	0.137931	0.34	0.240741	0.354167	0.354167	0.178571	0.178571	0.150685	0.150685	0.265306	0.145161	0.26	0.316667	0.200686	0.200686	0.339286	0.311475	0	0.075758	0	0.109091	0	0.147541	0.263158	0.131148	0.169231	0.357143	0.190476	0.08	0.26087	0.222222	0.155172	0.276923
D08950	0.269841	0.138462	0.263158	0.263158	0.105263	0.215385	0.142857	0.206897	0.193548	0.127273	0.297134	0	0.238274	0.297134	0.258621	0.288136	0.171875	0.288136	0.245902	0.298246	0.298246	0.209677	0.209677	0.1625	0.1625	0.267857	0.176471	0.263158	0.275362	0.215385	0.215385	0.292308	0.308824	0	0.066667	0	0.076923	0.014706	0.112676	0.163793	0.098592	0.164384	0.349206	0.253731	0.074627	0.237113	0.136364	0.101449	0.25
D09664	0.212121	0.104478	0.133858	0.133858	0.105263	0.274194	0.098039	0.206897	0.193548	0.068966	0.162162	0.025641	0.090909	0.162162	0.135303	0.146305	0.203852	0.146305	0.129272	0.174603	0.174603	0.209677	0.209677	0.291667	0.291667	0.139647	0.290323	0.241379	0.288433	0.316667	0.316667	0.306376	0.219178	0.02	0.126761	0.08	0.060606	0.014706	0.128571	0.208955	0.098592	0.14094	0.180556	0.217391	0.082707	0.13879	0.166407	0.134328	0.145704
D09665	0.175	0.08642	0.109677	0.109677	0.084507	0.223684	0.076923	0.166667	0.157895	0.055556	0.136364	0.021739	0.088435	0.136364	0.111111	0.120797	0.166448	0.120797	0.149425	0.142857	0.142857	0.219178	0.219178	0.244186	0.244186	0.128818	0.236842	0.194444	0.239368	0.256757	0.256757	0.251596	0.183908	0.048387	0.13253	0.096774	0.05	0.041096	0.107143	0.17284	0.082353	0.144509	0.151163	0.209877	0.104895	0.119023	0.136654	0.139241	0.124072
D09666	0.222222	0.153846	0.348837	0.348837	0.166667	0.203704	0.2	0.217391	0.2	0.142857	0.263158	0	0.173815	0.263158	0.196755	0.215686	0.196078	0.215686	0.215686	0.25	0.25	0.196078	0.196078	0.19697	0.19697	0.23913	0.222222	0.234043	0.213115	0.27451	0.27451	0.22807	0.229508	0.027778	0.1	0	0.098039	0.00813	0.101695	0.175439	0.103448	0.126984	0.290909	0.206897	0.065574	0.205882	0.173077	0.107143	0.21875
D09689	0.303571	0.175439	0.181818	0.181818	0.098039	0.241379	0.139535	0.188679	0.175439	0.1	0.274194	0.013889	0.18	0.274194	0.222222	0.294559	0.172414	0.294559	0.15	0.196429	0.196429	0.192982	0.192982	0.162162	0.162162	0.163636	0.177419	0.25	0.265625	0.2	0.2	0.283333	0.301587	0	0.089552	0.021739	0.067797	0.007692	0.074627	0.193548	0.075758	0.130435	0.322034	0.222222	0.070313	0.219178	0.133333	0.078125	0.231884
D09690	0.233766	0.171053	0.125485	0.125485	0.068493	0.175	0.092308	0.164384	0.155844	0.069444	0.246914	0.010638	0.140845	0.246914	0.205479	0.263889	0.125	0.263889	0.151899	0.171053	0.171053	0.139241	0.139241	0.125	0.125	0.162162	0.144578	0.175676	0.303797	0.160494	0.160494	0.269231	0.238095	0	0.079545	0.014706	0.118421	0.047945	0.08046	0.185185	0.094118	0.111111	0.261034	0.134021	0.06	0.21978	0.125	0.083333	0.202247
D09724	0.275862	0.133333	0.245283	0.245283	0.14	0.258621	0.190476	0.207547	0.192982	0.12	0.25	0.027778	0.217039	0.25	0.218182	0.272727	0.183533	0.272727	0.206897	0.236364	0.236364	0.210526	0.210526	0.225352	0.225352	0.226415	0.233333	0.346939	0.236802	0.280702	0.280702	0.252006	0.33871	0	0.121212	0.066667	0.066667	0.007634	0.140625	0.190476	0.107692	0.179104	0.316667	0.238095	0.078125	0.179554	0.219081	0.147541	0.189488
D09728	0.169231	0.129032	0.186736	0.186736	0.113208	0.271186	0.106383	0.18705	0.174497	0.074074	0.15493	0.013333	0.076389	0.15493	0.157718	0.15016	0.197302	0.15016	0.15016	0.174497	0.174497	0.224138	0.224138	0.236111	0.236111	0.163194	0.200632	0.236364	0.30031	0.315789	0.315789	0.320132	0.214286	0.044444	0.117647	0.041667	0.089109	0.015152	0.093294	0.230032	0.083455	0.105048	0.191176	0.25	0.068702	0.145704	0.152597	0.097561	0.153342
D09733	0.222222	0.108108	0.19403	0.19403	0.109375	0.208333	0.142857	0.164179	0.15493	0.09375	0.205128	0.023256	0.169036	0.205128	0.173913	0.217391	0.147994	0.217391	0.2	0.188406	0.188406	0.202899	0.202899	0.188235	0.188235	0.179104	0.189189	0.269841	0.195517	0.225352	0.225352	0.205767	0.276316	0.035088	0.128205	0.087719	0.054054	0.035461	0.115385	0.155844	0.088608	0.1625	0.256757	0.226667	0.101449	0.151717	0.175637	0.150685	0.158749
D09883	0.237288	0.155172	0.25	0.25	0.166667	0.309091	0.195122	0.211538	0.196429	0.122449	0.253968	0.013889	0.221532	0.253968	0.222222	0.277778	0.229656	0.277778	0.210526	0.175439	0.175439	0.236364	0.236364	0.283582	0.283582	0.230769	0.258621	0.3	0.327869	0.384615	0.384615	0.350877	0.322581	0	0.106061	0.044444	0.067797	0.007692	0.16129	0.275862	0.126984	0.181818	0.258065	0.222222	0.087302	0.171053	0.201413	0.169492	0.180556
D10024	0.206897	0.207547	0.319149	0.319149	0.152174	0.189655	0.179487	0.2	0.185185	0.130435	0.245902	0	0.15942	0.245902	0.181989	0.2	0.181818	0.2	0.2	0.230769	0.230769	0.181818	0.181818	0.185714	0.185714	0.22	0.206897	0.215686	0.258065	0.254545	0.254545	0.213115	0.215385	0.025	0.09375	0	0.153846	0.032258	0.095238	0.163934	0.172414	0.119403	0.271186	0.193548	0.063492	0.246377	0.160714	0.1	0.205882
D10064	0.271186	0.112903	0.218182	0.218182	0.137255	0.193548	0.108696	0.203704	0.189655	0.096154	0.246154	0	0.244898	0.246154	0.172414	0.267857	0.147541	0.267857	0.163934	0.169492	0.169492	0.186441	0.186441	0.128205	0.128205	0.178571	0.190476	0.155172	0.220588	0.254237	0.254237	0.234375	0.2	0	0.136364	0	0.065574	0.007576	0.057143	0.151515	0.057971	0.126761	0.269841	0.19697	0.05303	0.166667	0.129032	0.059701	0.175676
D10104	0.253968	0.177419	0.20339	0.20339	0.127273	0.181818	0.1	0.189655	0.177419	0.089286	0.231884	0	0.181818	0.231884	0.16129	0.25	0.138462	0.25	0.153846	0.15873	0.15873	0.138462	0.138462	0.121951	0.121951	0.166667	0.179104	0.145161	0.279412	0.238095	0.238095	0.220588	0.189189	0	0.097222	0	0.131148	0.045802	0.054054	0.142857	0.1	0.090909	0.253731	0.185714	0.051471	0.217949	0.121212	0.056338	0.166667
D10175	0.258065	0.142857	0.272727	0.272727	0.109091	0.262295	0.148936	0.214286	0.2	0.132075	0.253731	0.012987	0.207547	0.253731	0.183333	0.193548	0.177419	0.193548	0.193548	0.180328	0.180328	0.149606	0.149606	0.181818	0.181818	0.210526	0.278689	0.206897	0.211268	0.203125	0.203125	0.223881	0.26087	0	0.098592	0.04	0.0625	0	0.115942	0.215385	0.117647	0.185714	0.276923	0.261538	0.083969	0.175	0.177419	0.121212	0.184211
D10176	0.246154	0.153846	0.258621	0.258621	0.103448	0.25	0.14	0.20339	0.190476	0.125	0.242857	0.0125	0.218182	0.242857	0.174603	0.184615	0.169231	0.184615	0.184615	0.171875	0.171875	0.160305	0.160305	0.175	0.175	0.2	0.265625	0.196721	0.219178	0.19403	0.19403	0.214286	0.25	0	0.109589	0.037736	0.075758	0	0.111111	0.205882	0.112676	0.194444	0.264706	0.25	0.08209	0.182927	0.169231	0.115942	0.177215
D10426	0.196078	0.170213	0.358974	0.358974	0.157895	0.22449	0.233333	0.214286	0.195652	0.162162	0.240741	0	0.236842	0.240741	0.285714	0.266667	0.191489	0.266667	0.23913	0.25	0.25	0.191489	0.191489	0.193548	0.193548	0.238095	0.173077	0.261905	0.232143	0.25	0.25	0.25	0.22807	0	0.12963	0	0.108696	0	0.132075	0.148148	0.134615	0.2	0.245283	0.160714	0.096491	0.166667	0.244444	0.14	0.177419
D10486	0.196078	0.170213	0.358974	0.358974	0.157895	0.22449	0.233333	0.214286	0.195652	0.162162	0.240741	0	0.236842	0.240741	0.285714	0.266667	0.191489	0.266667	0.23913	0.25	0.25	0.191489	0.191489	0.193548	0.193548	0.238095	0.173077	0.261905	0.232143	0.25	0.25	0.25	0.22807	0	0.12963	0	0.108696	0	0.132075	0.148148	0.134615	0.2	0.245283	0.160714	0.096491	0.166667	0.244444	0.14	0.177419
D05819	0.163265	0.416667	0.166667	0.166667	0.176471	0.191489	0.137931	0.27027	0.243902	0.114286	0.166667	0.075472	0.184573	0.166667	0.182033	0.177778	0.130435	0.177778	0.232558	0.177829	0.177829	0.181818	0.181818	0.111111	0.111111	0.263158	0.117647	0.166667	0.140351	0.142857	0.142857	0.150943	0.118644	0	0.096154	0	0.093023	0	0.076923	0.130604	0.078431	0.141805	0.127273	0.150943	0.061404	0.106061	0.130435	0.081633	0.112903
D08503	0.131148	0.235294	0.196078	0.196078	0.209302	0.283019	0.184211	0.311111	0.285714	0.133333	0.153846	0.078125	0.138716	0.153846	0.141805	0.140351	0.185185	0.140351	0.25	0.211538	0.211538	0.163636	0.163636	0.223881	0.223881	0.276596	0.254545	0.196078	0.241935	0.307692	0.307692	0.258621	0.238095	0.025641	0.169492	0.04878	0.113208	0	0.172414	0.22807	0.155172	0.213115	0.15625	0.177419	0.081301	0.103896	0.207547	0.181818	0.109589
D08544	0.123077	0.218182	0.181818	0.181818	0.191489	0.263158	0.166667	0.285714	0.367347	0.122449	0.144928	0.073529	0.128107	0.144928	0.132075	0.131148	0.172414	0.131148	0.232143	0.196429	0.196429	0.152542	0.152542	0.211268	0.211268	0.254902	0.237288	0.181818	0.227273	0.285714	0.285714	0.241935	0.223881	0.023256	0.15873	0.044444	0.105263	0	0.16129	0.213115	0.145161	0.2	0.147059	0.166667	0.07874	0.098765	0.192982	0.169492	0.103896
D08907	0.229508	0.189655	0.175439	0.175439	0.183673	0.345455	0.133333	0.25	0.232143	0.075472	0.140845	0.027397	0.12963	0.140845	0.152542	0.183333	0.186441	0.183333	0.290909	0.169492	0.169492	0.206897	0.206897	0.222222	0.222222	0.2	0.25	0.135593	0.257576	0.321429	0.321429	0.274194	0.217391	0.045455	0.153846	0.088889	0.065574	0.015267	0.104478	0.245902	0.089552	0.19403	0.19403	0.316667	0.103175	0.123457	0.186441	0.145161	0.12987
D09618	0.257143	0.138889	0.19403	0.19403	0.126984	0.279412	0.122807	0.2	0.188406	0.186441	0.236842	0.011494	0.174603	0.236842	0.240429	0.272727	0.185714	0.272727	0.217391	0.28125	0.28125	0.202899	0.202899	0.231707	0.231707	0.234375	0.222222	0.25	0.352113	0.242857	0.242857	0.373134	0.310811	0.035088	0.128205	0.033333	0.114286	0.013889	0.175676	0.289855	0.146667	0.192308	0.23506	0.226667	0.109489	0.238095	0.220588	0.183099	0.25
D09635	0.307692	0.215686	0.25	0.25	0.214286	0.313725	0.222222	0.288889	0.265306	0.162791	0.345455	0	0.227273	0.345455	0.355556	0.361702	0.145455	0.361702	0.306122	0.291667	0.291667	0.211538	0.211538	0.157143	0.157143	0.340909	0.192982	0.25	0.357143	0.257036	0.257036	0.384615	0.327586	0	0.114754	0	0.115385	0	0.135593	0.254545	0.1	0.177419	0.327273	0.241379	0.073171	0.272727	0.235294	0.142857	0.290323
D09683	0.263158	0.178571	0.230769	0.230769	0.145833	0.224138	0.170732	0.215686	0.2	0.125	0.287129	0	0.176471	0.287129	0.277014	0.268657	0.155172	0.268657	0.214286	0.245283	0.245283	0.288462	0.288462	0.197183	0.197183	0.235294	0.2	0.306122	0.225115	0.267857	0.267857	0.239804	0.285714	0	0.090909	0	0.068966	0.007752	0.092308	0.210614	0.09375	0.132353	0.350877	0.245902	0.0625	0.200546	0.155172	0.096774	0.212121
D09919	0.296296	0.185185	0.24	0.24	0.204545	0.326923	0.210526	0.25	0.230769	0.155556	0.245902	0.014493	0.183932	0.245902	0.245059	0.269231	0.181818	0.269231	0.2	0.28	0.28	0.27451	0.27451	0.238806	0.238806	0.22	0.25	0.291667	0.258065	0.232143	0.232143	0.275862	0.295082	0	0.129032	0.047619	0.071429	0.015873	0.15	0.267857	0.152542	0.209677	0.315789	0.233333	0.089431	0.194444	0.181818	0.157895	0.205882
D09920	0.275862	0.259259	0.222222	0.222222	0.1875	0.303571	0.190476	0.230769	0.214286	0.142857	0.230769	0.013699	0.169591	0.230769	0.227106	0.25	0.169492	0.25	0.186441	0.259259	0.259259	0.254545	0.254545	0.225352	0.225352	0.203704	0.233333	0.269231	0.322581	0.216667	0.216667	0.258065	0.276923	0	0.121212	0.043478	0.142857	0.03937	0.140625	0.25	0.2	0.19697	0.295082	0.21875	0.086614	0.25	0.169492	0.147541	0.194444
D10465	0.197531	0.109756	0.151358	0.151358	0.111111	0.263158	0.106061	0.144737	0.1375	0.128571	0.153415	0.021053	0.152778	0.153415	0.227831	0.223684	0.164557	0.223684	0.223684	0.197368	0.197368	0.15	0.15	0.25	0.25	0.173333	0.2125	0.186667	0.329114	0.246753	0.246753	0.346667	0.218391	0.030303	0.141176	0.092308	0.074074	0.02649	0.185185	0.240506	0.130952	0.214286	0.214286	0.216867	0.183824	0.189474	0.179487	0.223684	0.197802
C00165	0	0	0.052632	0.052632	0	0	0	0	0	0	0	0.021277	0	0	0.078947	0	0.02381	0	0.023256	0	0	0.02381	0.02381	0	0	0	0	0	0	0.021739	0.021739	0	0	0.055556	0.043478	0.047619	0.151515	0.019231	0.068182	0	0.022222	0.039216	0	0.019608	0.037037	0.084746	0.02381	0.023256	0.090909
C01245	0	0	0	0	0	0	0	0	0.057692	0	0	0	0	0	0	0	0	0	0	0	0	0	0	0	0	0	0	0	0	0	0	0	0	0	0	0	0	0.0625	0	0	0	0	0	0	0.01626	0	0	0	0
C05981	0	0	0.030303	0.030303	0	0	0	0	0.044776	0	0	0.013333	0	0	0.045455	0	0	0	0.014085	0	0	0.014286	0.014286	0	0	0	0	0	0	0	0	0	0	0.021739	0.027027	0.020408	0.081967	0.063492	0.041667	0	0.013699	0.025316	0	0.012658	0.037037	0.057471	0.014286	0.014085	0.060241
D00341	0	0	0.064516	0.064516	0.090909	0.025641	0.133333	0	0	0.15	0.044444	0	0.125	0.044444	0.0625	0.057143	0	0.057143	0.088235	0.09375	0.09375	0	0	0.038462	0.038462	0.103448	0.025	0.064516	0.042553	0.052632	0.052632	0.046512	0.041667	0	0.025	0	0	0	0.052632	0.05	0.054054	0.045455	0.045455	0	0.019417	0.017857	0.058824	0.057143	0.019231
D01155	0.098039	0.041667	0.066667	0.066667	0.083333	0.057692	0.066667	0.045455	0.041667	0.055556	0.068966	0	0.05	0.068966	0.065217	0.083333	0.108696	0.083333	0.04	0.041667	0.041667	0.040816	0.040816	0.061538	0.061538	0.044444	0.12	0.090909	0.066667	0.078431	0.078431	0.071429	0.065574	0	0.037037	0.034483	0.045455	0.045872	0.037736	0.055556	0.038462	0.051724	0.089286	0.052632	0.034483	0.058824	0.0625	0.04	0.0625
D02368	0.098039	0.041667	0.066667	0.066667	0.083333	0.057692	0.066667	0.045455	0.041667	0.055556	0.068966	0	0.05	0.068966	0.065217	0.083333	0.108696	0.083333	0.04	0.041667	0.041667	0.040816	0.040816	0.061538	0.061538	0.044444	0.12	0.090909	0.066667	0.078431	0.078431	0.071429	0.065574	0	0.037037	0.034483	0.045455	0.045872	0.037736	0.055556	0.038462	0.051724	0.089286	0.052632	0.034483	0.058824	0.0625	0.04	0.0625
D02755	0.021277	0.02439	0	0	0	0.021739	0	0	0	0	0	0.021277	0	0	0	0	0.02381	0	0.073171	0	0	0.04878	0.04878	0.016667	0.016667	0	0.021277	0.052632	0	0	0	0	0.017857	0.117647	0.066667	0.157895	0	0.029126	0.044444	0	0.022222	0.06	0	0.061224	0.037037	0	0.02381	0.1	0
D08917	0.153846	0.107544	0.190053	0.190053	0.074074	0.15625	0.101512	0.12069	0.112903	0.266667	0.140845	0	0.244898	0.140845	0.259259	0.183333	0.141925	0.183333	0.20339	0.232143	0.232143	0.09375	0.09375	0.08642	0.08642	0.222222	0.071429	0.087662	0.152778	0.116139	0.116139	0.161765	0.12	0.022222	0.119403	0	0.203704	0	0.213115	0.134328	0.237288	0.176471	0.126761	0.097222	0.14876	0.22973	0.129032	0.145161	0.242857
D10026	0.135593	0.089286	0.150097	0.150097	0.136364	0.157895	0.102564	0.096154	0.089286	0.289474	0.089552	0.063492	0.204545	0.089552	0.153846	0.105263	0.148148	0.105263	0.145455	0.173077	0.173077	0.050847	0.050847	0.15942	0.15942	0.137255	0.155172	0.106942	0.119403	0.132075	0.132075	0.126984	0.134328	0	0.155172	0.108108	0.117647	0	0.294118	0.133333	0.27451	0.241379	0.090909	0.075758	0.13913	0.092105	0.148148	0.235294	0.097222
D10222	0.071429	0.029851	0.046875	0.046875	0.054545	0.042254	0.040816	0.031746	0.029851	0.14	0.051948	0	0.051724	0.051948	0.096774	0.059701	0.09375	0.059701	0.059701	0.045455	0.045455	0.044776	0.044776	0.060241	0.060241	0.064516	0.086957	0.063492	0.050633	0.057143	0.057143	0.053333	0.05	0.095238	0.056338	0.020833	0.181818	0.039063	0.088235	0.041096	0.057971	0.038961	0.066667	0.039474	0.069231	0.181818	0.044776	0.028986	0.191781
D00401	0.073171	0.055556	0.090909	0.090909	0.08	0.04878	0.052632	0.0625	0.055556	0.04	0.041667	0	0.034483	0.041667	0.027778	0.025641	0.054054	0.025641	0.052632	0.027027	0.027027	0.026316	0.026316	0.017857	0.017857	0.060606	0.047619	0	0.019608	0.02381	0.02381	0.021277	0.019231	0	0.023256	0	0.030303	0	0.02381	0.046512	0.02439	0.020833	0.065217	0.021277	0.009346	0.052632	0.026316	0.025641	0.056604
D00562	0.036717	0.105263	0.081081	0.081081	0.107143	0.093023	0.076233	0.117647	0.105263	0.098901	0.038462	0	0.0625	0.038462	0.051282	0.047619	0.075	0.047619	0.128205	0.068702	0.068702	0.075	0.075	0.046312	0.046312	0.147059	0.036717	0.052632	0.037037	0.068182	0.068182	0.04	0.036364	0.055556	0.043478	0	0.076487	0	0.068182	0.035941	0.062356	0.039216	0.033138	0.04	0.018182	0.06136	0.041162	0.047619	0.065719
D02747	0	0.018868	0.056911	0.056911	0.02381	0.017241	0.028571	0.020408	0.018868	0.135135	0.015385	0.016949	0.022222	0.015385	0.12766	0.037037	0.037736	0.037037	0.052632	0.058824	0.058824	0.057692	0.057692	0.025281	0.025281	0.0625	0.016949	0.04	0.014925	0.035088	0.035088	0.015873	0.014706	0.107143	0.111111	0	0.219512	0.017241	0.134615	0.033898	0.137255	0.083333	0.015625	0	0.078261	0.169231	0.037736	0.076923	0.180328
D02748	0	0.027027	0	0	0	0	0	0	0	0.04	0	0.023256	0	0	0.088235	0	0.026316	0	0.052632	0.055556	0.055556	0.054054	0.054054	0.017857	0.017857	0.029412	0	0.028571	0	0.02381	0.02381	0	0	0.153846	0.047619	0.058824	0.096774	0.02	0.075	0.022727	0.02439	0.020833	0	0.021277	0.018868	0.071429	0.026316	0.025641	0.076923
D03978	0.215385	0.216667	0.20339	0.20339	0.107143	0.181818	0.122449	0.189655	0.177419	0.12963	0.231884	0.025974	0.203704	0.231884	0.220339	0.209677	0.174603	0.209677	0.229508	0.196721	0.196721	0.213115	0.213115	0.135802	0.135802	0.206897	0.128571	0.145161	0.225352	0.2	0.2	0.238806	0.222222	0.111111	0.128571	0.06	0.095238	0.014815	0.054054	0.19403	0.069444	0.150685	0.194879	0.257576	0.091603	0.1875	0.138462	0.086957	0.197368
D04696	0.262295	0.145161	0.15	0.15	0.132075	0.1875	0.081633	0.264151	0.245614	0.072727	0.136986	0.040541	0.145455	0.136986	0.129032	0.177419	0.16129	0.177419	0.196721	0.20339	0.20339	0.125	0.125	0.097561	0.097561	0.214286	0.184615	0.15	0.133333	0.117647	0.117647	0.140845	0.146667	0	0.1	0.02	0.063492	0.007463	0.070423	0.21875	0.071429	0.123288	0.205882	0.173913	0.084615	0.120482	0.125	0.073529	0.126582
D06556	0.161765	0.237288	0.145161	0.145161	0.148148	0.21875	0.1	0.189655	0.177419	0.089286	0.164384	0.012821	0.203704	0.164384	0.174551	0.190476	0.213115	0.190476	0.190476	0.15873	0.15873	0.129771	0.129771	0.135802	0.135802	0.206897	0.19697	0.20339	0.318182	0.278689	0.278689	0.257576	0.212121	0.020408	0.097222	0.039216	0.15	0.053846	0.114286	0.176471	0.149254	0.150685	0.166667	0.202899	0.083333	0.25	0.174603	0.119403	0.197368
D07231	0.038375	0.142857	0.055556	0.055556	0.115385	0.071429	0.083744	0.125	0.111111	0.064639	0.04	0	0.066667	0.04	0.045576	0.042184	0.051282	0.042184	0.105263	0.044386	0.044386	0.043257	0.043257	0.029668	0.029668	0.121212	0.038375	0.085714	0.038462	0.046512	0.046512	0.041667	0.037736	0	0.022222	0	0.049563	0	0.039261	0.037528	0.040189	0.040816	0.034483	0.041667	0.009174	0.033333	0.043257	0.042184	0.035714
D07519	0.018868	0.021277	0	0	0	0.019231	0	0.023256	0.021277	0	0	0.08	0	0	0	0	0.042553	0	0	0	0	0	0	0.046875	0.046875	0	0.018868	0.045455	0	0	0	0	0.016129	0	0.018868	0.076923	0	0.009009	0.019231	0.018519	0.019608	0.035088	0	0.017544	0.008547	0	0.065217	0.020408	0
D08279	0.227197	0.152542	0.157895	0.157895	0.163265	0.377358	0.111111	0.207547	0.192982	0.142857	0.230769	0.027778	0.169591	0.230769	0.190053	0.243339	0.254545	0.243339	0.206897	0.172414	0.172414	0.131148	0.131148	0.26087	0.26087	0.226415	0.298246	0.245283	0.389831	0.46	0.46	0.418182	0.251885	0	0.116139	0.066667	0.103448	0	0.216667	0.286449	0.16129	0.228616	0.19697	0.194487	0.095238	0.184211	0.232143	0.22807	0.194444
D08344	0.209801	0.140625	0.145161	0.145161	0.148148	0.344828	0.1	0.189655	0.177419	0.12963	0.214286	0.039474	0.154529	0.214286	0.174551	0.223491	0.233333	0.223491	0.293103	0.15873	0.15873	0.15625	0.15625	0.255116	0.255116	0.206897	0.274194	0.224138	0.359375	0.418182	0.418182	0.383333	0.234222	0.041667	0.139971	0.104167	0.095238	0.014815	0.2	0.263823	0.149254	0.248143	0.183099	0.215227	0.108527	0.17284	0.213115	0.25	0.181818
D09024	0.223881	0.1875	0.174603	0.174603	0.140351	0.208955	0.115385	0.2	0.1875	0.084746	0.222222	0.025	0.172414	0.222222	0.190476	0.2	0.166667	0.2	0.181818	0.1875	0.1875	0.166667	0.166667	0.144578	0.144578	0.196721	0.138889	0.121212	0.216216	0.208955	0.208955	0.228571	0.22973	0.019231	0.093333	0	0.074627	0	0.051948	0.185714	0.066667	0.115385	0.20332	0.228571	0.065693	0.180723	0.132353	0.054054	0.189873
D09783	0.104478	0.0625	0.081967	0.081967	0.14	0.15873	0.086957	0.084746	0.079365	0.076923	0.09589	0.027778	0.052632	0.09589	0.098361	0.111111	0.112903	0.111111	0.129032	0.096774	0.096774	0.095238	0.095238	0.115385	0.115385	0.101695	0.138462	0.118644	0.138889	0.140625	0.140625	0.147059	0.169014	0.071429	0.193548	0.116279	0.032258	0.03937	0.123077	0.102941	0.107692	0.179104	0.097222	0.164179	0.104	0.097561	0.095238	0.186441	0.102564
D09959	0.211538	0.111111	0.170213	0.170213	0.243243	0.192308	0.114286	0.152174	0.14	0.071429	0.15	0.032787	0.081678	0.15	0.142857	0.18	0.234043	0.18	0.134615	0.117647	0.117647	0.09434	0.09434	0.169231	0.169231	0.148936	0.26	0.162791	0.183333	0.169811	0.169811	0.196429	0.2	0	0.166667	0.121212	0.06	0	0.148148	0.163636	0.12963	0.172414	0.127695	0.116667	0.076271	0.112676	0.115385	0.156863	0.119403
D09960	0.196429	0.103074	0.156863	0.156863	0.219512	0.178571	0.102564	0.14	0.22	0.065217	0.140625	0.030769	0.075051	0.140625	0.132075	0.166667	0.215686	0.166667	0.125	0.109091	0.109091	0.087719	0.087719	0.15942	0.15942	0.137255	0.240741	0.150097	0.171875	0.157895	0.157895	0.183333	0.1875	0	0.155172	0.108108	0.055556	0	0.137931	0.152542	0.12069	0.16129	0.119751	0.109375	0.07377	0.106667	0.107143	0.145455	0.112676
D09970	0.127273	0.076923	0.102041	0.102041	0.184211	0.196078	0.117647	0.106383	0.098039	0.1	0.114754	0.033333	0.066667	0.114754	0.122449	0.137255	0.14	0.137255	0.115385	0.12	0.12	0.055556	0.055556	0.136364	0.136364	0.12766	0.169811	0.148936	0.166667	0.173077	0.173077	0.178571	0.20339	0	0.192308	0.090909	0.04	0.008403	0.150943	0.125	0.132075	0.155172	0.116667	0.137931	0.076923	0.114286	0.117647	0.16	0.121212
D10078	0	0.021739	0.046512	0.046512	0	0	0	0.02381	0.021739	0.09375	0	0	0	0	0.022222	0.020833	0.043478	0.020833	0.042553	0.044444	0.044444	0.043478	0.043478	0.015385	0.015385	0.047619	0	0.022727	0	0.019608	0.019608	0	0	0.142857	0.06	0	0.102564	0.018349	0.04	0.018868	0.108696	0.035714	0	0	0.054054	0.061538	0.021277	0.042553	0.065574
D10365	0.247892	0.172414	0.238274	0.238274	0.14	0.258621	0.136364	0.230769	0.214286	0.056604	0.230769	0.013699	0.111111	0.230769	0.155172	0.186441	0.277778	0.186441	0.180438	0.16041	0.16041	0.169492	0.169492	0.225352	0.225352	0.197053	0.321429	0.245283	0.242424	0.351852	0.351852	0.258065	0.290824	0	0.088235	0.043478	0.066667	0	0.123077	0.223491	0.074627	0.128571	0.253968	0.232227	0.069767	0.164295	0.197917	0.129032	0.173261
D10476	0.176471	0.180328	0.25	0.25	0.150943	0.203125	0.125	0.192982	0.180328	0.2	0.2	0.012987	0.153153	0.2	0.163934	0.213115	0.153239	0.213115	0.269297	0.241379	0.241379	0.258621	0.258621	0.197368	0.197368	0.232143	0.15899	0.186441	0.178082	0.222222	0.222222	0.188406	0.208333	0.139535	0.164179	0.04	0.114754	0.030303	0.084507	0.139971	0.117647	0.147994	0.220588	0.218425	0.100775	0.175	0.140625	0.104478	0.184211
D00537	0.033898	0	0	0	0.023256	0.016949	0	0	0	0	0	0.016667	0.044444	0	0	0	0.018182	0	0	0.018519	0.018519	0.037037	0.037037	0.013699	0.013699	0	0.016667	0.06	0	0	0	0	0.014493	0	0.051724	0.029412	0	0.04386	0.016949	0	0.017241	0.047619	0	0	0.01626	0	0.018182	0.017857	0
D04155	0.076923	0.136364	0.230769	0.230769	0.147059	0.145833	0.21673	0.15	0.136364	0.225806	0.127273	0.037037	0.235294	0.127273	0.166667	0.155556	0.133333	0.155556	0.130435	0.136364	0.136364	0.108696	0.108696	0.144279	0.144279	0.146341	0.12	0.170732	0.163636	0.195652	0.195652	0.176471	0.140351	0	0.12	0	0.095238	0	0.145833	0.14	0.148936	0.150943	0.123389	0.2	0.061947	0.090909	0.214286	0.155556	0.096774
D09996	0.258621	0.155172	0.25	0.25	0.166667	0.220339	0.166667	0.26	0.240741	0.122449	0.234375	0	0.255319	0.234375	0.269231	0.301887	0.152542	0.301887	0.254545	0.264151	0.264151	0.214286	0.214286	0.162162	0.162162	0.28	0.196721	0.181818	0.265625	0.214165	0.214165	0.283333	0.242424	0.023256	0.140625	0	0.125	0.007692	0.125	0.213115	0.092308	0.181818	0.278689	0.241935	0.062016	0.236111	0.192982	0.112903	0.25
D10405	0.22807	0.122807	0.24	0.24	0.204545	0.301887	0.179487	0.25	0.230769	0.106383	0.169231	0.044776	0.15942	0.169231	0.188679	0.2	0.203704	0.2	0.178571	0.207547	0.207547	0.181818	0.181818	0.238806	0.238806	0.196078	0.296296	0.24	0.21875	0.232143	0.232143	0.233333	0.253968	0	0.147541	0.073171	0.071429	0	0.189655	0.245614	0.152542	0.209677	0.229508	0.193548	0.107438	0.146667	0.226415	0.2	0.15493
D09731	0.272727	0.122807	0.230159	0.230159	0.152174	0.232143	0.121951	0.25	0.230769	0.061224	0.169231	0.044776	0.12	0.169231	0.166667	0.2	0.203704	0.2	0.178571	0.163636	0.163636	0.160714	0.160714	0.202899	0.202899	0.173077	0.25	0.265306	0.2	0.204188	0.204188	0.213115	0.215385	0	0.129032	0.1	0.071429	0	0.131148	0.20339	0.07425	0.153846	0.223491	0.233333	0.063492	0.12713	0.175407	0.137931	0.134163
D08859	0.101695	0.072727	0.117647	0.117647	0.142857	0.142857	0.138889	0.145833	0.134615	0.175	0.092308	0.015625	0.243902	0.092308	0.16	0.150943	0.153846	0.150943	0.173077	0.229167	0.229167	0.132075	0.132075	0.130435	0.130435	0.191489	0.12069	0.156187	0.15873	0.142857	0.142857	0.169492	0.121212	0	0.181818	0.026316	0.122449	0.008197	0.230769	0.178571	0.188679	0.206897	0.09375	0.112903	0.084034	0.094595	0.2	0.244898	0.1
D08869	0.053571	0.039216	0.133333	0.133333	0.05	0.074074	0.129032	0.065217	0.06	0.051282	0.101695	0	0.153846	0.101695	0.061224	0.057692	0.058824	0.057692	0.057692	0.06	0.06	0.102041	0.102041	0.043478	0.043478	0.06383	0.053571	0.0625	0.046875	0.09434	0.09434	0.05	0.096774	0	0.156863	0	0.065217	0.008621	0.074074	0.052632	0.075472	0.163636	0.103448	0.05	0.051282	0.041667	0.125	0.078431	0.044118
D09010	0.272727	0.190476	0.2	0.2	0.147059	0.222222	0.230769	0.210526	0.190476	0.1875	0.192308	0.018182	0.3125	0.192308	0.215881	0.200924	0.177829	0.200924	0.333333	0.219512	0.219512	0.243902	0.243902	0.131148	0.131148	0.236842	0.12	0.142857	0.185185	0.162791	0.162791	0.2	0.181818	0.08	0.142857	0.071429	0.095238	0.017857	0.078431	0.163265	0.125	0.22	0.22	0.25	0.090909	0.16129	0.159091	0.130435	0.172414
D09320	0.147541	0.084746	0.107143	0.107143	0.12766	0.277778	0.095238	0.090909	0.084746	0.238095	0.085714	0.029412	0.191489	0.085714	0.145455	0.1	0.12069	0.1	0.118644	0.142857	0.142857	0.048387	0.048387	0.202899	0.202899	0.12963	0.186441	0.101243	0.181818	0.210526	0.210526	0.193548	0.128571	0	0.129032	0.047619	0.111111	0.007874	0.277778	0.183333	0.259259	0.209677	0.086957	0.088235	0.135593	0.088608	0.181818	0.245283	0.093333
D09377	0.084746	0.115385	0.142857	0.142857	0.146341	0.188679	0.142857	0.125	0.115385	0.210526	0.111111	0.103448	0.136364	0.111111	0.163265	0.153846	0.113208	0.153846	0.176471	0.208333	0.208333	0.072727	0.072727	0.203125	0.203125	0.170213	0.103448	0.12	0.16129	0.145455	0.145455	0.172414	0.123077	0	0.163636	0.027027	0.08	0.008264	0.188679	0.160714	0.192308	0.210526	0.095238	0.114754	0.122807	0.066667	0.204082	0.2	0.070423
D09869	0.216667	0.135593	0.24283	0.24283	0.142857	0.2	0.195122	0.211538	0.196429	0.122449	0.234375	0	0.229167	0.234375	0.245283	0.254545	0.146712	0.254545	0.232143	0.264151	0.264151	0.186736	0.186736	0.131579	0.131579	0.254902	0.140625	0.160714	0.246154	0.19403	0.19403	0.262295	0.28125	0.023256	0.177419	0	0.125	0	0.125	0.213115	0.109375	0.238095	0.322034	0.203125	0.087302	0.236111	0.172414	0.131148	0.25
D00279	0.104167	0.093023	0.125	0.125	0.090909	0.106383	0.208333	0.162162	0.146341	0.129032	0.072727	0	0.114286	0.072727	0.243243	0.139535	0.116279	0.139535	0.139535	0.175	0.175	0.116279	0.116279	0.081967	0.081967	0.157895	0.081633	0.097561	0.109091	0.083333	0.083333	0.117647	0.068966	0	0.06	0	0.30303	0	0.238095	0.148936	0.085106	0.09434	0.09434	0.096154	0.035398	0.169492	0.142857	0.139535	0.181818
D00334	0.122449	0.113636	0.093023	0.093023	0.117647	0.125	0.24	0.125	0.113636	0.15625	0.12963	0	0.108108	0.12963	0.090909	0.085106	0.111111	0.085106	0.186047	0.139535	0.139535	0.190476	0.190476	0.114754	0.114754	0.15	0.1	0.175	0.125	0.125	0.125	0.134615	0.122807	0.181818	0.170213	0.074074	0.153846	0.027273	0.08	0.098039	0.104167	0.153846	0.111111	0.18	0.072072	0.126984	0.086957	0.133333	0.135593
D00395	0.163934	0.12069	0.145455	0.145455	0.125	0.147541	0.093023	0.297872	0.27451	0.081633	0.115942	0.075758	0.075472	0.115942	0.142857	0.155172	0.118644	0.155172	0.196429	0.226415	0.226415	0.157895	0.157895	0.12	0.12	0.215686	0.163934	0.139241	0.161765	0.123596	0.123596	0.171875	0.126761	0	0.059701	0.046512	0.109091	0.015748	0.129032	0.220339	0.095238	0.101449	0.117647	0.171875	0.046512	0.0875	0.157895	0.135593	0.092105
D00565	0.166667	0.133201	0.195652	0.195652	0.121951	0.192308	0.21875	0.204545	0.1875	0.125	0.169492	0.032787	0.225	0.169492	0.333333	0.255319	0.108987	0.255319	0.255319	0.295455	0.295455	0.153082	0.153082	0.151515	0.151515	0.255814	0.125	0.145833	0.20339	0.163227	0.163227	0.218182	0.16129	0	0.067797	0	0.177778	0	0.169811	0.28	0.089286	0.152542	0.172414	0.155172	0.058333	0.215385	0.26087	0.134615	0.229508
D00596	0.145161	0.128472	0.139241	0.139241	0.08	0.147541	0.093023	0.196078	0.181818	0.104167	0.115942	0.059701	0.1875	0.115942	0.207547	0.196429	0.137931	0.196429	0.288462	0.27451	0.27451	0.178571	0.178571	0.12	0.12	0.265306	0.092308	0.139241	0.161765	0.105845	0.105845	0.171875	0.142857	0.076923	0.092308	0.071429	0.12963	0.04878	0.111111	0.2	0.095238	0.1875	0.151515	0.190476	0.097561	0.208333	0.178571	0.155172	0.220588
D00945	0.163636	0.130604	0.183932	0.183932	0.093023	0.166667	0.111111	0.276596	0.2527	0.121951	0.129032	0.066667	0.162791	0.129032	0.266667	0.22449	0.221532	0.22449	0.22449	0.26087	0.26087	0.172962	0.172962	0.149254	0.149254	0.25	0.122807	0.183932	0.180328	0.139241	0.139241	0.192982	0.140625	0.029412	0.066667	0.027027	0.173913	0.016667	0.145455	0.25	0.107143	0.15	0.15	0.152542	0.066667	0.176471	0.229167	0.132075	0.1875
D01208	0.152542	0.121157	0.169591	0.169591	0.0625	0.155172	0.128205	0.183673	0.169811	0.086957	0.121212	0	0.173913	0.121212	0.244898	0.185185	0.099476	0.185185	0.185185	0.215686	0.215686	0.160221	0.160221	0.08	0.08	0.204082	0.079365	0.111111	0.151515	0.111111	0.111111	0.16129	0.115942	0	0.046154	0	0.208333	0	0.135593	0.232143	0.064516	0.123077	0.140625	0.142857	0.047619	0.2	0.188679	0.103448	0.212121
D01366	0.166667	0.133201	0.25	0.25	0.121951	0.192308	0.21875	0.232558	0.212766	0.184211	0.189655	0	0.25641	0.189655	0.333333	0.282609	0.153082	0.282609	0.340909	0.357143	0.357143	0.2527	0.2527	0.134328	0.134328	0.317073	0.125	0.170213	0.224138	0.208577	0.208577	0.240741	0.2	0.096774	0.145455	0.057143	0.177778	0.016807	0.169811	0.28	0.12963	0.236364	0.192982	0.196429	0.094828	0.19697	0.318182	0.229167	0.209677
D02815	0.035088	0.039216	0	0	0.105263	0.017544	0	0.020833	0.019231	0	0	0.035088	0.022727	0	0	0	0.038462	0	0.057692	0	0	0.058824	0.058824	0.014085	0.014085	0.020408	0.035088	0.02	0.015152	0.017544	0.017544	0.016129	0.014925	0.071429	0.053571	0.1	0	0.017391	0.035714	0.034483	0.036364	0.066667	0	0.05	0.033613	0	0.018868	0.078431	0
D03106	0.203704	0.18	0.163265	0.163265	0.2	0.163636	0.108108	0.25	0.229167	0.093023	0.145161	0.015625	0.151242	0.145161	0.183673	0.196078	0.132075	0.196078	0.270833	0.204082	0.204082	0.2	0.2	0.098592	0.098592	0.244444	0.160714	0.212766	0.196721	0.136767	0.136767	0.210526	0.15625	0.058824	0.12069	0.083333	0.122449	0.016529	0.142857	0.18705	0.086207	0.160862	0.129032	0.210526	0.075	0.157143	0.176471	0.196078	0.166667
D03493	0.148148	0.076923	0.102041	0.102041	0.184211	0.12963	0.117647	0.238095	0.217391	0.1	0.0625	0.087719	0.090909	0.0625	0.145833	0.137255	0.163265	0.137255	0.137255	0.166667	0.166667	0.117647	0.117647	0.136364	0.136364	0.152174	0.127273	0.118012	0.147541	0.089286	0.089286	0.157895	0.092308	0	0.068966	0.090909	0.130435	0.016949	0.22	0.235294	0.132075	0.155172	0.063492	0.1	0.067797	0.083333	0.1875	0.234043	0.088235
D03521	0.142857	0.086957	0.090909	0.090909	0.114286	0.1	0.142857	0.15	0.136364	0.117647	0.068966	0.018182	0.105263	0.068966	0.139535	0.130435	0.108696	0.130435	0.181818	0.162791	0.162791	0.159091	0.159091	0.078125	0.078125	0.146341	0.098039	0.108545	0.103448	0.057692	0.057692	0.111111	0.083333	0.08	0.12	0.111111	0.15	0.017857	0.145833	0.14	0.102041	0.150943	0.070175	0.132075	0.061947	0.090909	0.159091	0.209302	0.096774
D03653	0.25	0.163636	0.192308	0.192308	0.177778	0.232143	0.15	0.25	0.230769	0.209302	0.206349	0.060606	0.244444	0.206349	0.3125	0.32	0.181818	0.32	0.346939	0.361702	0.361702	0.140351	0.140351	0.185714	0.185714	0.386364	0.166667	0.148148	0.278689	0.204188	0.204188	0.298246	0.215385	0.025	0.09375	0.023256	0.132075	0.007874	0.131148	0.267857	0.133333	0.171875	0.209677	0.174603	0.080645	0.211268	0.203704	0.137931	0.223881
D03747	0.181818	0.128107	0.266667	0.266667	0.142857	0.207547	0.205882	0.27907	0.255319	0.146341	0.20339	0	0.243902	0.20339	0.348837	0.326087	0.169591	0.326087	0.270833	0.282609	0.282609	0.169591	0.169591	0.147059	0.147059	0.302326	0.140351	0.205074	0.280702	0.223709	0.223709	0.301887	0.233333	0	0.083333	0	0.145833	0	0.185185	0.2	0.125	0.166667	0.25	0.169492	0.075	0.227273	0.25	0.173077	0.241935
D03941	0.280702	0.155172	0.181818	0.181818	0.12	0.220339	0.113636	0.235294	0.218182	0.145833	0.19697	0.057971	0.18	0.19697	0.2	0.254545	0.172414	0.254545	0.254545	0.288462	0.288462	0.166381	0.166381	0.162162	0.162162	0.28	0.140625	0.160714	0.208955	0.174551	0.174551	0.222222	0.205882	0.023256	0.089552	0.021739	0.086207	0.015504	0.074627	0.213115	0.109375	0.130435	0.181818	0.203125	0.07874	0.171053	0.152542	0.078125	0.180556
D05030	0.09434	0.083333	0.111111	0.111111	0.078947	0.096154	0.172414	0.142857	0.130435	0.111111	0.066667	0	0.1	0.066667	0.133333	0.125	0.081633	0.125	0.125	0.130435	0.130435	0.081633	0.081633	0.059701	0.059701	0.139535	0.074074	0.079914	0.1	0.075472	0.075472	0.107143	0.063492	0	0.054545	0	0.142857	0	0.117647	0.113208	0.076923	0.086207	0.086207	0.068966	0.033898	0.088235	0.12766	0.125	0.09375
D05091	0.21875	0.16129	0.141925	0.141925	0.109091	0.184615	0.08	0.207815	0.19403	0.132075	0.194879	0	0.185185	0.194879	0.314815	0.298246	0.15873	0.298246	0.321429	0.333333	0.333333	0.216667	0.216667	0.123457	0.123457	0.301887	0.130435	0.129032	0.264706	0.144131	0.144131	0.28125	0.20332	0.088889	0.098592	0.04	0.172414	0.030303	0.132353	0.253968	0.101449	0.169014	0.215227	0.261538	0.083969	0.253333	0.140625	0.15625	0.267606
D05150	0.240741	0.196078	0.221532	0.221532	0.086957	0.245283	0.162162	0.266667	0.244898	0.088889	0.210614	0.063492	0.204545	0.210614	0.304348	0.285714	0.169811	0.285714	0.235294	0.297872	0.297872	0.215686	0.215686	0.15942	0.15942	0.26087	0.098361	0.18	0.25	0.137931	0.137931	0.267857	0.206349	0	0.063492	0.025	0.096154	0.01626	0.1	0.236364	0.083333	0.16129	0.214165	0.20339	0.07377	0.202899	0.192308	0.105263	0.215385
D05292	0.113636	0.102564	0.108108	0.108108	0.103448	0.090909	0.190476	0.181818	0.162162	0.148148	0.078431	0	0.129032	0.078431	0.166667	0.153846	0.1	0.153846	0.25	0.162162	0.162162	0.157895	0.157895	0.068966	0.068966	0.176471	0.088889	0.090426	0.117647	0.066667	0.066667	0.12766	0.074074	0.111111	0.113636	0.095238	0.181818	0.019048	0.142857	0.136364	0.093023	0.148936	0.08	0.152174	0.066038	0.101695	0.157895	0.216216	0.109091
D05739	0.236364	0.141805	0.217039	0.217039	0.133333	0.218182	0.157895	0.288889	0.265306	0.086957	0.15625	0.0625	0.173913	0.15625	0.244898	0.254902	0.188679	0.254902	0.230769	0.24	0.24	0.235294	0.235294	0.191176	0.191176	0.255319	0.152542	0.169591	0.225806	0.129848	0.129848	0.241379	0.184615	0	0.0625	0.02439	0.115385	0.02439	0.116667	0.301887	0.081967	0.140625	0.216667	0.2	0.056	0.235294	0.211538	0.122807	0.25
D06102	0.172414	0.087719	0.2	0.2	0.085106	0.155172	0.128205	0.16	0.148148	0.111111	0.121212	0	0.08	0.121212	0.22	0.163636	0.166667	0.163636	0.163636	0.192308	0.192308	0.125	0.125	0.094595	0.094595	0.18	0.172414	0.111111	0.134328	0.135593	0.135593	0.142857	0.1	0.026316	0.0625	0	0.183673	0	0.155172	0.189655	0.081967	0.073529	0.15873	0.125	0.03937	0.235294	0.105263	0.103448	0.25
D07187	0.166667	0.133201	0.162791	0.162791	0.069767	0.148148	0.147059	0.169978	0.156187	0.125	0.169492	0	0.195122	0.169492	0.365854	0.255319	0.153082	0.255319	0.204082	0.23913	0.23913	0.130604	0.130604	0.085714	0.085714	0.227273	0.105263	0.122449	0.20339	0.141805	0.141805	0.218182	0.125	0.030303	0.067797	0	0.261905	0	0.169811	0.185185	0.089286	0.133333	0.146712	0.135593	0.067227	0.253968	0.16	0.113208	0.271186
D07724	0.155172	0.123389	0.172962	0.172962	0.06383	0.157895	0.131579	0.1875	0.173077	0.088889	0.123077	0	0.177778	0.123077	0.25	0.188679	0.101243	0.188679	0.188679	0.22	0.22	0.163227	0.163227	0.081081	0.081081	0.208333	0.080645	0.113208	0.153846	0.112985	0.112985	0.163934	0.117647	0	0.046875	0	0.212766	0	0.137931	0.236364	0.065574	0.125	0.142857	0.145161	0.048	0.202899	0.192308	0.105263	0.215385
D08378	0.163636	0.130604	0.183932	0.183932	0.093023	0.166667	0.111111	0.276596	0.2527	0.121951	0.129032	0.066667	0.162791	0.129032	0.266667	0.22449	0.221532	0.22449	0.22449	0.26087	0.26087	0.172962	0.172962	0.149254	0.149254	0.25	0.122807	0.183932	0.180328	0.139241	0.139241	0.192982	0.140625	0.029412	0.066667	0.027027	0.173913	0.016667	0.145455	0.25	0.107143	0.15	0.15	0.152542	0.066667	0.176471	0.229167	0.132075	0.1875
D08491	0.163636	0.146245	0.15942	0.15942	0.093023	0.166667	0.111111	0.227273	0.208333	0.121951	0.129032	0.066667	0.190476	0.129032	0.23913	0.22449	0.156863	0.22449	0.25	0.318182	0.318182	0.134615	0.134615	0.132353	0.132353	0.27907	0.103448	0.15942	0.180328	0.119005	0.119005	0.192982	0.15873	0.029412	0.066667	0.027027	0.148936	0.016667	0.125	0.226415	0.107143	0.169492	0.169492	0.172414	0.066667	0.230769	0.204082	0.132075	0.245902
D08845	0.290909	0.181818	0.211538	0.211538	0.125	0.22807	0.119048	0.189084	0.175407	0.152174	0.203125	0	0.1875	0.203125	0.207547	0.264151	0.178571	0.264151	0.34	0.3	0.3	0.245283	0.245283	0.135135	0.135135	0.291667	0.145161	0.166667	0.215385	0.180438	0.180438	0.229508	0.212121	0.076923	0.145161	0.046512	0.089286	0.032	0.076923	0.180328	0.131148	0.169231	0.1875	0.25	0.106557	0.175676	0.118644	0.116667	0.185714
D08890	0.157895	0.125704	0.183673	0.183673	0.113636	0.181818	0.2	0.191489	0.176471	0.142857	0.16129	0	0.209302	0.16129	0.255319	0.24	0.144465	0.24	0.291667	0.304348	0.304348	0.189084	0.189084	0.112676	0.112676	0.266667	0.118644	0.137255	0.193548	0.197053	0.197053	0.206897	0.153846	0.088235	0.118644	0.052632	0.142857	0.016393	0.12069	0.264151	0.103448	0.183333	0.163934	0.186441	0.083333	0.188406	0.244898	0.169811	0.2
D08949	0.186441	0.151079	0.163227	0.163227	0.06	0.15	0.095238	0.192843	0.178637	0.181818	0.163859	0	0.217391	0.163859	0.3125	0.294118	0.154529	0.294118	0.294118	0.28	0.28	0.203704	0.203704	0.077922	0.077922	0.244898	0.076923	0.121157	0.238095	0.107544	0.107544	0.254237	0.179104	0.108108	0.111111	0.047619	0.153846	0.04065	0.112903	0.183333	0.152542	0.171875	0.166407	0.193548	0.098361	0.228571	0.160714	0.157895	0.242424
D09350	0.222222	0.176471	0.208333	0.208333	0.113636	0.203704	0.166667	0.236203	0.217039	0.116279	0.180328	0	0.238095	0.180328	0.255319	0.215686	0.166348	0.215686	0.319149	0.276596	0.276596	0.386364	0.386364	0.112676	0.112676	0.295455	0.137931	0.137255	0.213115	0.154529	0.154529	0.22807	0.184834	0.121212	0.178571	0.052632	0.142857	0.024793	0.101695	0.264151	0.084746	0.245614	0.20339	0.25	0.07438	0.223881	0.173077	0.169811	0.238095
D09579	0.157895	0.147228	0.2527	0.2527	0.113636	0.181818	0.166667	0.230769	0.212121	0.170732	0.241379	0	0.3	0.241379	0.340909	0.24	0.144465	0.24	0.265306	0.304348	0.304348	0.173077	0.173077	0.112676	0.112676	0.295455	0.118644	0.153082	0.193548	0.175407	0.175407	0.206897	0.229508	0.027778	0.118644	0	0.217391	0	0.226415	0.218182	0.122807	0.183333	0.245614	0.186441	0.083333	0.223881	0.22	0.169811	0.238095
D00075	0.051724	0.018519	0	0	0.073171	0.071429	0	0.040816	0.037736	0	0	0.070175	0	0	0	0	0.056604	0	0	0	0	0	0	0.121212	0.121212	0	0.089286	0.039216	0.029851	0.034483	0.034483	0.031746	0.029412	0	0.070175	0.129032	0	0.025862	0.090909	0.087719	0.035088	0.064516	0	0.015625	0.077586	0	0.076923	0.096154	0
D00586	0.12	0.111111	0.142857	0.142857	0.147059	0.145833	0.391304	0.121951	0.111111	0.1875	0.215686	0.037037	0.166667	0.215686	0.139535	0.155556	0.108696	0.155556	0.155556	0.136364	0.136364	0.133333	0.133333	0.169492	0.169492	0.146341	0.12	0.170732	0.163636	0.122449	0.122449	0.176471	0.226415	0	0.12	0	0.095238	0	0.122449	0.096154	0.102041	0.150943	0.22	0.111111	0.061947	0.107692	0.133333	0.130435	0.114754
D00961	0.175439	0.123389	0.221532	0.221532	0.111111	0.2	0.194444	0.212766	0.196078	0.166667	0.258621	0	0.292683	0.258621	0.25	0.26	0.127273	0.26	0.235294	0.244898	0.244898	0.232604	0.232604	0.126761	0.126761	0.26087	0.135593	0.18	0.25	0.172291	0.172291	0.267857	0.266667	0	0.135593	0	0.117647	0	0.137931	0.192982	0.101695	0.220339	0.285714	0.163934	0.065041	0.185714	0.215686	0.145455	0.19697
D00965	0.132075	0.102041	0.083333	0.083333	0.162162	0.113208	0.285714	0.162791	0.148936	0.076923	0.157895	0.052632	0.095238	0.157895	0.081633	0.076923	0.1	0.076923	0.076923	0.08	0.08	0.122449	0.122449	0.123077	0.123077	0.085106	0.090909	0.083333	0.096774	0.092593	0.092593	0.103448	0.169492	0	0.071429	0	0.086957	0	0.072727	0.150943	0.054545	0.101695	0.160714	0.103448	0.033333	0.085714	0.145833	0.076923	0.090909
D03820	0.130435	0.074627	0.09375	0.09375	0.150943	0.184615	0.148936	0.133333	0.125	0.090909	0.150685	0.098592	0.103448	0.150685	0.109375	0.104478	0.123077	0.104478	0.088235	0.090909	0.090909	0.106061	0.106061	0.197368	0.197368	0.095238	0.147059	0.147541	0.131579	0.132353	0.132353	0.138889	0.175676	0	0.130435	0.083333	0.0625	0.014925	0.184615	0.128571	0.117647	0.169014	0.152778	0.093333	0.109375	0.08046	0.140625	0.193548	0.084337
D04498	0.212766	0.205674	0.186441	0.186441	0.111111	0.217391	0.222222	0.27027	0.243902	0.114286	0.188679	0	0.228571	0.188679	0.25	0.232558	0.147903	0.232558	0.232558	0.275	0.275	0.200924	0.200924	0.111111	0.111111	0.263158	0.117647	0.166667	0.226415	0.135903	0.135903	0.244898	0.178571	0	0.075472	0	0.146341	0	0.12	0.208333	0.078431	0.148148	0.192308	0.22	0.052174	0.196721	0.238095	0.12766	0.210526
D10218	0.183333	0.160714	0.211538	0.211538	0.148936	0.186441	0.175	0.22	0.203704	0.12766	0.262295	0.014286	0.1875	0.262295	0.207547	0.196429	0.137931	0.196429	0.175439	0.203704	0.203704	0.178571	0.178571	0.166667	0.166667	0.192308	0.145161	0.166667	0.19697	0.186441	0.186441	0.209677	0.290323	0	0.075758	0	0.070175	0	0.09375	0.220339	0.095238	0.134328	0.310345	0.190476	0.062992	0.144737	0.269231	0.098361	0.152778
D00113	0.147228	0.102041	0.106383	0.106383	0.102564	0.134615	0.090909	0.111111	0.102041	0.166667	0.064516	0.052632	0.15	0.064516	0.12766	0.076923	0.170213	0.076923	0.076923	0.08	0.08	0.057692	0.057692	0.140625	0.140625	0.085106	0.111111	0.076605	0.096774	0.106942	0.106942	0.103448	0.112903	0	0.176471	0.172414	0.136364	0	0.229167	0.089286	0.208333	0.197053	0.065574	0.103448	0.117117	0.085714	0.122449	0.191489	0.090909
D00138	0.148148	0.098039	0.102041	0.102041	0.071429	0.109091	0.085714	0.083333	0.076923	0.157895	0.0625	0.033333	0.142857	0.0625	0.122449	0.074074	0.14	0.074074	0.074074	0.076923	0.076923	0.055556	0.055556	0.098097	0.098097	0.081633	0.087719	0.052632	0.076923	0.083481	0.083481	0.081967	0.092308	0	0.148148	0.081081	0.130435	0.034483	0.189084	0.067797	0.176471	0.149228	0.063492	0.081967	0.095652	0.083333	0.096154	0.153082	0.088235
D00525	0.081633	0.021739	0.097561	0.097561	0.028571	0.061224	0.035714	0.04878	0.044444	0.029412	0.072727	0.081633	0.026316	0.072727	0.095238	0.065217	0.142857	0.065217	0.042553	0.021739	0.021739	0.043478	0.043478	0.1	0.1	0.047619	0.06	0.097561	0.051724	0.04	0.04	0.055556	0.068966	0	0.039216	0.08	0.04878	0.018349	0.083333	0.038462	0.0625	0.054545	0.074074	0.017857	0.035398	0.078125	0.116279	0.065217	0.083333
D01840	0.134615	0.152174	0.159091	0.159091	0.272727	0.226216	0.129032	0.195122	0.177778	0.108108	0.140351	0.017241	0.285714	0.140351	0.181818	0.170213	0.2	0.170213	0.145833	0.152174	0.152174	0.173913	0.173913	0.16129	0.16129	0.162791	0.229167	0.186047	0.218182	0.234043	0.234043	0.235294	0.192982	0	0.255319	0.064516	0.088889	0	0.16	0.2	0.14	0.28	0.122807	0.166667	0.098214	0.102941	0.173913	0.170213	0.109375
D02200	0.081633	0.021739	0.097561	0.097561	0.028571	0.061224	0.035714	0.04878	0.044444	0.029412	0.072727	0.081633	0.026316	0.072727	0.095238	0.065217	0.142857	0.065217	0.042553	0.021739	0.021739	0.043478	0.043478	0.1	0.1	0.047619	0.06	0.097561	0.051724	0.04	0.04	0.055556	0.068966	0	0.039216	0.08	0.04878	0.018349	0.083333	0.038462	0.0625	0.054545	0.074074	0.017857	0.035398	0.078125	0.116279	0.065217	0.083333
D03115	0.208955	0.114413	0.15873	0.15873	0.163636	0.230769	0.075472	0.183333	0.171875	0.067797	0.20332	0.0125	0.218182	0.20332	0.213115	0.241935	0.169231	0.241935	0.149254	0.153846	0.153846	0.151515	0.151515	0.160494	0.160494	0.16129	0.208955	0.177419	0.271429	0.188707	0.188707	0.287879	0.25	0	0.173913	0.037736	0.059701	0	0.126761	0.205882	0.097222	0.228571	0.15747	0.159618	0.098485	0.141176	0.134328	0.132353	0.148148
D05478	0.076923	0.020408	0.090909	0.090909	0.026316	0.057692	0.103448	0.045455	0.041667	0.027027	0.068966	0.076923	0.02439	0.068966	0.088889	0.061224	0.133333	0.061224	0.04	0.020408	0.020408	0.040816	0.040816	0.095238	0.095238	0.044444	0.056604	0.090909	0.04918	0.037736	0.037736	0.052632	0.065574	0	0.037037	0.071429	0.045455	0.017857	0.078431	0.036364	0.058824	0.051724	0.070175	0.016949	0.034483	0.074627	0.108696	0.061224	0.079365
D07941	0.134615	0.152174	0.159091	0.159091	0.272727	0.226216	0.129032	0.195122	0.177778	0.108108	0.140351	0.017241	0.285714	0.140351	0.181818	0.170213	0.2	0.170213	0.145833	0.152174	0.152174	0.173913	0.173913	0.16129	0.16129	0.162791	0.229167	0.186047	0.218182	0.234043	0.234043	0.235294	0.192982	0	0.255319	0.064516	0.088889	0	0.16	0.2	0.14	0.28	0.122807	0.166667	0.098214	0.102941	0.173913	0.170213	0.109375
D08878	0.220339	0.178571	0.223709	0.223709	0.122449	0.145161	0.116279	0.192308	0.178571	0.052632	0.164179	0.028571	0.08818	0.164179	0.181818	0.146712	0.149228	0.146712	0.172414	0.157895	0.157895	0.175439	0.175439	0.118421	0.118421	0.166667	0.16129	0.185185	0.13798	0.145161	0.145161	0.146305	0.157143	0	0.090909	0	0.087719	0.007752	0.075758	0.153239	0.055807	0.084507	0.203125	0.206349	0.054264	0.153342	0.092985	0.046154	0.161826
D09589	0.240741	0.196078	0.247357	0.247357	0.136364	0.157895	0.131579	0.212766	0.196078	0.058315	0.177419	0.015152	0.097308	0.177419	0.147228	0.160221	0.163227	0.160221	0.211538	0.173077	0.173077	0.192308	0.192308	0.126761	0.126761	0.183673	0.175439	0.204082	0.148545	0.157895	0.157895	0.158238	0.169231	0	0.098361	0	0.055556	0.008065	0.047619	0.166381	0.060359	0.090909	0.214165	0.224138	0.048	0.132333	0.101243	0.05	0.139971
D00107	0.031915	0.011111	0.034884	0.034884	0.038961	0.090909	0.013889	0.011628	0.011111	0.039474	0.009804	0.054348	0.012195	0.009804	0.034483	0.01087	0.069767	0.01087	0.021978	0.022472	0.022472	0.033708	0.033708	0.119023	0.119023	0.011494	0.077778	0.034884	0.039604	0.043478	0.043478	0.041237	0.039216	0	0.111111	0.059701	0.023529	0.047297	0.142857	0.076923	0.104651	0.108696	0.009901	0.020202	0.133803	0.027273	0.045455	0.120482	0.028302
D00184	0	0	0.036364	0.036364	0.009615	0.016807	0.010309	0	0	0.04	0.015873	0.042735	0.028571	0.015873	0.017699	0.017241	0.008621	0.017241	0.035088	0.054545	0.054545	0.008621	0.008621	0.038462	0.038462	0.027273	0.008264	0.017857	0.015625	0.016807	0.016807	0.016129	0.023438	0	0.033898	0	0.009009	0	0.052174	0.008197	0.061947	0.067227	0.03252	0.016129	0.127273	0.029851	0.017391	0.044248	0.030769
D05480	0.028939	0.011236	0.035294	0.035294	0.039474	0.091954	0.014085	0.011765	0.011236	0.04	0.009901	0.054945	0.012346	0.009901	0.034884	0.010989	0.083333	0.010989	0.022222	0.022727	0.022727	0.034091	0.034091	0.13188	0.13188	0.011628	0.078652	0.035294	0.04	0.043956	0.043956	0.041667	0.039604	0	0.112399	0.060606	0.036145	0.040541	0.158537	0.077778	0.105882	0.10989	0.01	0.020408	0.142857	0.037037	0.045977	0.121951	0.038462
D08556	0.031915	0.011111	0.034884	0.034884	0.038961	0.090909	0.013889	0.011628	0.011111	0.039474	0.009804	0.054348	0.012195	0.009804	0.034483	0.01087	0.069767	0.01087	0.021978	0.022472	0.022472	0.033708	0.033708	0.119023	0.119023	0.011494	0.077778	0.034884	0.039604	0.043478	0.043478	0.041237	0.039216	0	0.111111	0.059701	0.023529	0.047297	0.142857	0.076923	0.104651	0.108696	0.009901	0.020202	0.133803	0.027273	0.045455	0.120482	0.028302
D09033	0	0	0.036036	0.036036	0.009524	0.016667	0.010204	0	0	0.039604	0.015748	0.033613	0.028302	0.015748	0.017544	0.017094	0.008547	0.017094	0.034783	0.054054	0.054054	0.008547	0.008547	0.038168	0.038168	0.027027	0.008197	0.017699	0.015504	0.016667	0.016667	0.016	0.023256	0	0.033613	0	0.008929	0	0.051724	0.00813	0.061404	0.066667	0.032258	0.016	0.126506	0.02963	0.017241	0.04386	0.030534
D09671	0.229508	0.189655	0.135593	0.135593	0.16	0.345455	0.085106	0.25	0.232143	0.075472	0.191176	0.071429	0.150943	0.191176	0.192982	0.267857	0.206897	0.267857	0.20339	0.189655	0.189655	0.129032	0.129032	0.222222	0.222222	0.222222	0.209677	0.135593	0.33871	0.298246	0.298246	0.362069	0.235294	0	0.102941	0.042553	0.065574	0	0.104478	0.266667	0.089552	0.15942	0.176471	0.234375	0.094488	0.166667	0.166667	0.109375	0.175676
D09718	0.21875	0.180328	0.129032	0.129032	0.150943	0.327586	0.08	0.236364	0.220339	0.071429	0.183099	0.068493	0.142857	0.183099	0.183333	0.254237	0.196721	0.254237	0.233333	0.180328	0.180328	0.15873	0.15873	0.213333	0.213333	0.210526	0.2	0.129032	0.323077	0.283333	0.283333	0.344262	0.225352	0.042553	0.130435	0.083333	0.0625	0.014925	0.1	0.253968	0.085714	0.185714	0.169014	0.261538	0.11811	0.160494	0.15873	0.138462	0.168831
D09014	0.185185	0.208333	0.209503	0.209503	0.093023	0.211538	0.176471	0.227273	0.208333	0.095238	0.166667	0.032258	0.162791	0.166667	0.212766	0.176471	0.150097	0.176471	0.22449	0.208333	0.208333	0.404762	0.404762	0.166667	0.166667	0.222222	0.103448	0.142857	0.180328	0.125	0.125	0.192982	0.196721	0	0.084746	0	0.08	0.008264	0.086207	0.181818	0.127273	0.131148	0.210526	0.214286	0.07563	0.142857	0.134615	0.090909	0.151515
D10437	0.301887	0.166667	0.244898	0.244898	0.238095	0.283019	0.25	0.255319	0.235294	0.108696	0.315789	0.014706	0.195652	0.315789	0.24	0.3	0.207547	0.3	0.203704	0.235294	0.235294	0.185185	0.185185	0.188406	0.188406	0.22449	0.277778	0.22	0.241935	0.259259	0.259259	0.258621	0.3	0	0.112903	0.02381	0.072727	0	0.114754	0.320755	0.116667	0.174603	0.298246	0.258621	0.081301	0.214286	0.185185	0.12069	0.227273
D00109	0.111111	0.157895	0.105263	0.105263	0.137931	0.139535	0.181818	0.111111	0.1	0.142857	0.098039	0	0.125	0.098039	0.228571	0.15	0.097561	0.15	0.210526	0.157895	0.157895	0.153846	0.153846	0.067797	0.067797	0.171429	0.06383	0.076923	0.09434	0.088889	0.088889	0.102041	0.072727	0.105263	0.136364	0.090909	0.212121	0.018868	0.139535	0.085106	0.090909	0.170213	0.078431	0.125	0.075472	0.1	0.097561	0.15	0.107143
D00118	0.195652	0.225	0.166253	0.166253	0.117647	0.173913	0.24	0.184211	0.166667	0.121212	0.173077	0.018519	0.205882	0.173077	0.170732	0.159091	0.154734	0.159091	0.275	0.195122	0.195122	0.315789	0.315789	0.152542	0.152542	0.179487	0.1	0.146341	0.166667	0.118012	0.118012	0.18	0.163636	0.083333	0.122449	0.074074	0.125	0.027273	0.102041	0.217391	0.081633	0.22449	0.176471	0.255319	0.081818	0.145161	0.190476	0.159091	0.155172
D00120	0.185185	0.231423	0.183932	0.183932	0.093023	0.188679	0.176471	0.255814	0.234043	0.095238	0.129032	0.015873	0.25	0.129032	0.212766	0.2	0.128107	0.2	0.276596	0.208333	0.208333	0.282609	0.282609	0.1	0.1	0.25	0.103448	0.142857	0.220339	0.139241	0.139241	0.214286	0.15873	0.09375	0.142857	0.055556	0.148936	0.016667	0.105263	0.181818	0.068966	0.232143	0.169492	0.236364	0.066667	0.19403	0.204082	0.176471	0.1875
D00126	0.106383	0.095238	0.157895	0.157895	0.09375	0.108696	0.166667	0.2	0.179487	0.133333	0.074074	0.061224	0.117647	0.074074	0.184211	0.170732	0.119048	0.170732	0.297297	0.15	0.15	0.175	0.175	0.101695	0.101695	0.194444	0.083333	0.083744	0.132075	0.0625	0.0625	0.142857	0.089286	0.095238	0.130435	0.083333	0.166667	0.018519	0.159091	0.12766	0.136364	0.163265	0.075472	0.12	0.084112	0.096774	0.146341	0.230769	0.103448
D00127	0.215686	0.166667	0.285714	0.285714	0.216216	0.22	0.1875	0.155556	0.142857	0.189189	0.236364	0	0.263158	0.236364	0.309524	0.288889	0.163265	0.288889	0.288889	0.333333	0.333333	0.14	0.14	0.136364	0.136364	0.325	0.215686	0.227273	0.22807	0.22	0.22	0.245283	0.20339	0	0.107143	0	0.083333	0	0.109091	0.188679	0.111111	0.175439	0.264151	0.137931	0.095652	0.21875	0.212766	0.115385	0.233333
D00130	0.244444	0.219512	0.263158	0.263158	0.147059	0.222222	0.230769	0.277778	0.25	0.117647	0.192308	0	0.2	0.192308	0.186441	0.200924	0.151242	0.200924	0.238095	0.190476	0.190476	0.307692	0.307692	0.131148	0.131148	0.205128	0.142857	0.170732	0.185185	0.170213	0.170213	0.2	0.226415	0.08	0.142857	0.071429	0.095238	0.017857	0.078431	0.163265	0.08	0.189084	0.270833	0.304348	0.071429	0.16129	0.186047	0.130435	0.172414
D00132	0.212766	0.159091	0.225	0.225	0.176471	0.217391	0.222222	0.189873	0.172414	0.21875	0.188679	0.017857	0.433333	0.188679	0.25	0.232558	0.147903	0.232558	0.325	0.243902	0.243902	0.195402	0.195402	0.129032	0.129032	0.230769	0.117647	0.123853	0.181818	0.15942	0.15942	0.196078	0.178571	0.076923	0.14	0.068966	0.093023	0.017699	0.098039	0.183673	0.145833	0.215686	0.192308	0.22	0.1	0.15873	0.181818	0.152174	0.169492
D00141	0.230769	0.208333	0.272727	0.272727	0.146341	0.235294	0.212121	0.276596	0.2527	0.121951	0.19863	0	0.219512	0.19863	0.295455	0.276596	0.156863	0.276596	0.395349	0.348837	0.348837	0.311111	0.311111	0.149254	0.149254	0.375	0.185185	0.166667	0.263158	0.204589	0.204589	0.283019	0.237288	0.09375	0.122807	0.055556	0.125	0.02521	0.125	0.354167	0.087719	0.210526	0.254545	0.259259	0.07563	0.230769	0.204082	0.2	0.245902
D00151	0.191489	0.25	0.2	0.2	0.181818	0.222222	0.142857	0.210526	0.190476	0.151515	0.215686	0	0.272727	0.215686	0.25641	0.268293	0.159091	0.268293	0.3	0.219512	0.219512	0.275	0.275	0.131148	0.131148	0.27027	0.166667	0.2	0.207547	0.222222	0.222222	0.22449	0.181818	0.08	0.166667	0.071429	0.095238	0.017857	0.078431	0.14	0.08	0.196078	0.173077	0.2	0.100917	0.142857	0.133333	0.130435	0.152542
D00158	0.163265	0.159091	0.25641	0.25641	0.142857	0.191489	0.222222	0.205128	0.186047	0.147059	0.188679	0	0.194444	0.188679	0.282051	0.232558	0.155556	0.232558	0.292683	0.275	0.275	0.209302	0.209302	0.111111	0.111111	0.263158	0.14	0.158392	0.203704	0.166667	0.166667	0.22	0.2	0.12	0.117647	0.068966	0.146341	0.017699	0.142857	0.234043	0.1	0.215686	0.215686	0.196078	0.09009	0.216667	0.268293	0.232558	0.232143
D00169	0.212766	0.243902	0.25641	0.25641	0.111111	0.244444	0.178571	0.236842	0.214286	0.147059	0.211538	0	0.194444	0.211538	0.25	0.261905	0.155556	0.261905	0.292683	0.243902	0.243902	0.268293	0.268293	0.129032	0.129032	0.263158	0.163265	0.225	0.203704	0.191489	0.191489	0.22	0.178571	0.076923	0.117647	0.068966	0.093023	0.017699	0.076923	0.16	0.078431	0.192308	0.192308	0.244898	0.09009	0.140625	0.181818	0.12766	0.15
D00315	0.111111	0.148936	0.155556	0.155556	0.264706	0.18	0.125	0.25	0.227273	0.076923	0.081967	0.016949	0.095238	0.081967	0.104167	0.12	0.145833	0.12	0.244444	0.125	0.125	0.195652	0.195652	0.106061	0.106061	0.214286	0.132075	0.130435	0.114754	0.134615	0.134615	0.122807	0.112903	0.107143	0.176471	0.096774	0.086957	0.017241	0.113208	0.109091	0.09434	0.140351	0.101695	0.185185	0.068966	0.085714	0.1	0.166667	0.090909
D00330	0.272727	0.190476	0.2	0.2	0.147059	0.222222	0.230769	0.201044	0.182033	0.1875	0.192308	0.018182	0.3125	0.192308	0.215881	0.200924	0.177829	0.200924	0.333333	0.219512	0.219512	0.234867	0.234867	0.131148	0.131148	0.236842	0.12	0.142857	0.185185	0.162791	0.162791	0.2	0.181818	0.08	0.142857	0.071429	0.095238	0.017857	0.078431	0.163265	0.125	0.22	0.22	0.25	0.090909	0.16129	0.159091	0.130435	0.172414
D00425	0.195652	0.225	0.227154	0.227154	0.151515	0.227273	0.291667	0.216216	0.195122	0.233333	0.196078	0	0.242424	0.196078	0.230769	0.214286	0.182033	0.214286	0.243902	0.25641	0.25641	0.282051	0.282051	0.152542	0.152542	0.277778	0.145833	0.175	0.211538	0.166307	0.166307	0.229167	0.185185	0.04	0.122449	0	0.153846	0.008929	0.148936	0.244444	0.12766	0.22449	0.2	0.204082	0.081818	0.183333	0.219512	0.159091	0.196429
D00428	0.1875	0.186047	0.139535	0.139535	0.111111	0.217391	0.137931	0.146341	0.133333	0.114286	0.166667	0	0.228571	0.166667	0.315789	0.261905	0.130435	0.261905	0.292683	0.243902	0.243902	0.181818	0.181818	0.09375	0.09375	0.263158	0.096154	0.113636	0.160714	0.12	0.12	0.173077	0.137931	0.076923	0.117647	0.068966	0.175	0.017699	0.12	0.16	0.078431	0.192308	0.148148	0.22	0.1	0.15873	0.130435	0.12766	0.169492
D00463	0.297872	0.162791	0.177778	0.177778	0.189189	0.22449	0.121212	0.205674	0.187905	0.194444	0.196429	0	0.27027	0.196429	0.227273	0.23913	0.191489	0.23913	0.295455	0.309524	0.309524	0.191489	0.191489	0.104478	0.104478	0.268293	0.12963	0.104167	0.189655	0.169591	0.169591	0.203704	0.166667	0.142857	0.150943	0.060606	0.108696	0.017094	0.090909	0.192308	0.134615	0.2	0.2	0.25	0.096491	0.184615	0.12	0.163265	0.196721
D00510	0.192308	0.135903	0.118012	0.118012	0.071429	0.12963	0.107872	0.147903	0.135903	0.222222	0.133333	0.050847	0.263158	0.133333	0.170213	0.16	0.1875	0.16	0.183673	0.191489	0.191489	0.096154	0.096154	0.136364	0.136364	0.204545	0.087719	0.08871	0.129032	0.109091	0.109091	0.137931	0.109375	0.064516	0.087719	0.028571	0.130435	0.008403	0.089286	0.26	0.153846	0.129848	0.116667	0.118644	0.076923	0.164179	0.212766	0.074074	0.174603
D00566	0.119048	0.171429	0.114286	0.114286	0.153846	0.15	0.210526	0.121212	0.108108	0.16	0.104167	0	0.137931	0.104167	0.176471	0.162162	0.105263	0.162162	0.228571	0.171429	0.171429	0.166667	0.166667	0.071429	0.071429	0.1875	0.068182	0.083333	0.1	0.095238	0.095238	0.108696	0.076923	0.125	0.146341	0.105263	0.121212	0.019417	0.095238	0.090909	0.097561	0.181818	0.083333	0.159091	0.07767	0.067797	0.105263	0.162162	0.072727
D00567	0.25	0.156863	0.205074	0.205074	0.116279	0.185185	0.138889	0.214128	0.196755	0.093023	0.283906	0	0.275	0.283906	0.26087	0.270833	0.176471	0.270833	0.22	0.229167	0.229167	0.192843	0.192843	0.098592	0.098592	0.244444	0.160714	0.149194	0.237288	0.157324	0.157324	0.254545	0.254237	0	0.12069	0	0.122449	0	0.103448	0.32	0.067797	0.186441	0.346154	0.169492	0.04878	0.208955	0.176471	0.109091	0.222222
D00568	0.22	0.20614	0.144708	0.144708	0.073171	0.153846	0.121212	0.177829	0.162791	0.162162	0.135593	0.033898	0.382353	0.135593	0.227273	0.212766	0.135903	0.212766	0.212766	0.222222	0.222222	0.15942	0.15942	0.072464	0.072464	0.238095	0.089286	0.090535	0.189655	0.104972	0.104972	0.181818	0.129032	0	0.109091	0	0.159091	0	0.111111	0.192308	0.113208	0.2	0.137931	0.160714	0.059322	0.166667	0.217391	0.117647	0.15873
D03218	0.307692	0.215686	0.22449	0.22449	0.186047	0.288462	0.189189	0.26087	0.24	0.136364	0.298246	0	0.285714	0.298246	0.355556	0.361702	0.145455	0.361702	0.333333	0.265306	0.265306	0.188679	0.188679	0.157143	0.157143	0.372093	0.192982	0.2	0.310345	0.211573	0.211573	0.333333	0.262295	0	0.079365	0	0.074074	0	0.098361	0.210526	0.1	0.177419	0.280702	0.180328	0.090909	0.272727	0.166667	0.103448	0.290323
D03736	0.230769	0.138462	0.180328	0.180328	0.145455	0.274194	0.12	0.22807	0.213115	0.148148	0.30303	0.012658	0.2	0.30303	0.296625	0.333333	0.229508	0.333333	0.266667	0.298246	0.298246	0.153846	0.153846	0.192308	0.192308	0.290909	0.230769	0.263158	0.396825	0.316667	0.316667	0.423729	0.303075	0.02	0.126761	0.038462	0.111111	0.007299	0.161765	0.285714	0.130435	0.197183	0.307692	0.2	0.107692	0.230769	0.25	0.169231	0.243243
D06285	0.27451	0.172962	0.23913	0.23913	0.142857	0.306122	0.138889	0.241535	0.221532	0.119048	0.261101	0	0.214286	0.261101	0.414634	0.452381	0.169591	0.452381	0.297872	0.311111	0.311111	0.192843	0.192843	0.147059	0.147059	0.333333	0.203704	0.163265	0.303571	0.207547	0.207547	0.326923	0.254237	0	0.083333	0	0.122449	0	0.103448	0.245283	0.086207	0.147541	0.265823	0.204188	0.075	0.265625	0.153846	0.109091	0.283333
D06402	0.117647	0.206897	0.192982	0.192982	0.134615	0.171875	0.155556	0.245283	0.22807	0.115385	0.138889	0.055556	0.121157	0.138889	0.125612	0.125	0.109375	0.125	0.309091	0.206897	0.206897	0.183333	0.183333	0.141026	0.141026	0.240741	0.151515	0.152542	0.135135	0.171875	0.171875	0.142857	0.148649	0.093023	0.169231	0.041667	0.118644	0.030769	0.119403	0.132353	0.104478	0.191176	0.157143	0.176471	0.09375	0.135802	0.145161	0.16129	0.142857
D06678	0.307692	0.148148	0.22449	0.22449	0.243902	0.240741	0.189189	0.26087	0.24	0.162791	0.275862	0	0.227273	0.275862	0.355556	0.422222	0.188679	0.422222	0.254902	0.24	0.24	0.204589	0.204589	0.157143	0.157143	0.282609	0.172414	0.25	0.357143	0.211573	0.211573	0.384615	0.327586	0	0.133333	0	0.09434	0	0.116667	0.189655	0.118644	0.15873	0.280702	0.19403	0.081967	0.235294	0.166667	0.122807	0.25
D07269	0.212766	0.159091	0.225	0.225	0.176471	0.217391	0.222222	0.189873	0.172414	0.21875	0.188679	0.017857	0.433333	0.188679	0.25	0.232558	0.147903	0.232558	0.325	0.243902	0.243902	0.195402	0.195402	0.129032	0.129032	0.230769	0.117647	0.123853	0.181818	0.15942	0.15942	0.196078	0.178571	0.076923	0.14	0.068966	0.093023	0.017699	0.098039	0.183673	0.145833	0.215686	0.192308	0.22	0.1	0.15873	0.181818	0.152174	0.169492
D08103	0.212766	0.159091	0.225	0.225	0.176471	0.217391	0.222222	0.189873	0.172414	0.21875	0.188679	0.017857	0.433333	0.188679	0.25	0.232558	0.147903	0.232558	0.325	0.243902	0.243902	0.195402	0.195402	0.129032	0.129032	0.230769	0.117647	0.123853	0.181818	0.15942	0.15942	0.196078	0.178571	0.076923	0.14	0.068966	0.093023	0.017699	0.098039	0.183673	0.145833	0.215686	0.192308	0.22	0.1	0.15873	0.181818	0.152174	0.169492
D08162	0.212766	0.243902	0.25641	0.25641	0.111111	0.244444	0.178571	0.236842	0.214286	0.147059	0.211538	0	0.194444	0.211538	0.25	0.261905	0.155556	0.261905	0.292683	0.243902	0.243902	0.268293	0.268293	0.129032	0.129032	0.263158	0.163265	0.225	0.203704	0.191489	0.191489	0.22	0.178571	0.076923	0.117647	0.068966	0.093023	0.017699	0.076923	0.16	0.078431	0.192308	0.192308	0.244898	0.09009	0.140625	0.181818	0.12766	0.15
D08374	0.27451	0.18	0.231102	0.231102	0.170732	0.230769	0.171429	0.157895	0.145631	0.236842	0.258865	0.015625	0.378378	0.258865	0.318182	0.326087	0.153846	0.326087	0.244898	0.255319	0.255319	0.165049	0.165049	0.147059	0.147059	0.244444	0.160714	0.223176	0.280702	0.207547	0.207547	0.301887	0.233333	0	0.101695	0	0.078431	0	0.122807	0.178571	0.166667	0.186441	0.206897	0.183533	0.09322	0.208955	0.153846	0.12963	0.222222
D08375	0.27451	0.18	0.231102	0.231102	0.170732	0.230769	0.171429	0.157895	0.145631	0.236842	0.258865	0.015625	0.378378	0.258865	0.318182	0.326087	0.153846	0.326087	0.244898	0.255319	0.255319	0.165049	0.165049	0.147059	0.147059	0.244444	0.160714	0.223176	0.280702	0.207547	0.207547	0.301887	0.233333	0	0.101695	0	0.078431	0	0.122807	0.178571	0.166667	0.186441	0.206897	0.183533	0.09322	0.208955	0.153846	0.12963	0.222222
D08552	0.133333	0.24	0.2	0.2	0.159091	0.196429	0.189189	0.288889	0.265306	0.136364	0.15625	0.0625	0.141649	0.15625	0.144465	0.142857	0.125	0.142857	0.254902	0.24	0.24	0.166667	0.166667	0.157143	0.157143	0.282609	0.172414	0.176471	0.151515	0.196429	0.196429	0.16129	0.166667	0.026316	0.133333	0	0.137255	0	0.135593	0.15	0.1	0.15873	0.177419	0.16129	0.056	0.150685	0.166667	0.122807	0.15942
D08881	0.213115	0.214286	0.172291	0.172291	0.1875	0.258621	0.111111	0.21673	0.201413	0.091618	0.171303	0.013699	0.098901	0.171303	0.163194	0.174497	0.225577	0.174497	0.215278	0.207815	0.207815	0.210526	0.210526	0.208333	0.208333	0.235741	0.213115	0.245283	0.25	0.303571	0.303571	0.266234	0.238806	0.046512	0.138462	0.043478	0.09215	0.015385	0.096096	0.243781	0.119751	0.139971	0.215385	0.258065	0.078125	0.174935	0.138614	0.100629	0.184573
D08883	0.191176	0.190476	0.153239	0.153239	0.163636	0.230769	0.096154	0.191275	0.179245	0.080617	0.155378	0.0125	0.105611	0.155378	0.145511	0.156156	0.200632	0.156156	0.25	0.184834	0.184834	0.245902	0.245902	0.189873	0.189873	0.228669	0.191176	0.216667	0.225895	0.269841	0.269841	0.239067	0.216216	0.083333	0.157143	0.078431	0.082317	0.045113	0.086957	0.218425	0.107994	0.15747	0.194444	0.263001	0.10687	0.160287	0.12426	0.122449	0.168342
D08947	0.266667	0.129032	0.192982	0.192982	0.204082	0.209677	0.155556	0.222222	0.296296	0.137255	0.242424	0	0.192308	0.242424	0.301887	0.333333	0.158238	0.333333	0.220339	0.206897	0.206897	0.177446	0.177446	0.141026	0.141026	0.240741	0.151515	0.214286	0.3125	0.184834	0.184834	0.333333	0.287879	0	0.117647	0	0.081967	0	0.102941	0.166667	0.104478	0.140845	0.246154	0.171303	0.076923	0.210526	0.145161	0.107692	0.222222
D08963	0.236364	0.148148	0.333333	0.333333	0.133333	0.218182	0.157895	0.183673	0.169811	0.111111	0.233333	0	0.125	0.233333	0.150943	0.230769	0.235294	0.230769	0.142857	0.169811	0.169811	0.211538	0.211538	0.191176	0.191176	0.156863	0.283019	0.2	0.206349	0.240741	0.240741	0.220339	0.222222	0.054054	0.114754	0	0.115385	0	0.080645	0.183533	0.1	0.123077	0.237288	0.2	0.073171	0.217391	0.119005	0.084746	0.230769
D09386	0.1875	0.129032	0.307692	0.307692	0.113208	0.271186	0.155556	0.245283	0.22807	0.115385	0.188406	0.027027	0.141805	0.188406	0.225577	0.220339	0.20339	0.220339	0.2	0.272727	0.272727	0.163934	0.163934	0.141026	0.141026	0.218182	0.206349	0.192982	0.248143	0.209677	0.209677	0.263823	0.25	0	0.151515	0.041667	0.1	0	0.209677	0.241935	0.174603	0.185944	0.227273	0.176471	0.12	0.194805	0.245614	0.220339	0.205479
D09602	0.303571	0.155172	0.27451	0.27451	0.142857	0.220339	0.139535	0.235294	0.218182	0.078431	0.253968	0	0.156863	0.253968	0.178571	0.277778	0.192982	0.277778	0.189655	0.175439	0.175439	0.172414	0.172414	0.162162	0.162162	0.207547	0.237288	0.160714	0.246154	0.241379	0.241379	0.262295	0.242424	0	0.123077	0	0.067797	0	0.074627	0.213115	0.092308	0.147059	0.258065	0.241935	0.07874	0.186667	0.133333	0.078125	0.197183
D09603	0.253731	0.164179	0.239804	0.239804	0.116667	0.169014	0.111111	0.213115	0.2	0.064516	0.25	0	0.147541	0.25	0.203125	0.290323	0.161765	0.290323	0.19403	0.181818	0.181818	0.144928	0.144928	0.141176	0.141176	0.209677	0.217391	0.134328	0.333333	0.197691	0.197691	0.294118	0.223684	0	0.105263	0	0.138462	0.021583	0.092105	0.197183	0.123288	0.141026	0.219178	0.222222	0.072464	0.25	0.144928	0.09589	0.21519
D09639	0.218182	0.150943	0.282609	0.282609	0.190476	0.269231	0.194444	0.266667	0.244898	0.166667	0.196721	0.015152	0.191011	0.196721	0.217039	0.235294	0.215686	0.235294	0.211538	0.297872	0.297872	0.215686	0.215686	0.19403	0.19403	0.234043	0.240741	0.282609	0.229508	0.245283	0.245283	0.245614	0.245902	0	0.135593	0.051282	0.096154	0.008065	0.178571	0.172414	0.160714	0.230769	0.2	0.177446	0.082645	0.147994	0.208577	0.188679	0.156662
D10017	0.173077	0.222222	0.144708	0.144708	0.1	0.153846	0.193548	0.159091	0.145833	0.131579	0.155172	0.016667	0.236842	0.155172	0.227273	0.14	0.15942	0.14	0.1875	0.195652	0.195652	0.302326	0.302326	0.138462	0.138462	0.181818	0.089286	0.12766	0.169492	0.125704	0.125704	0.160714	0.147541	0.032258	0.12963	0	0.214286	0.008475	0.153846	0.192308	0.092593	0.2	0.157895	0.181818	0.059322	0.222222	0.166667	0.096154	0.216667
D10062	0.278689	0.142857	0.206897	0.206897	0.150943	0.222222	0.125	0.236364	0.220339	0.176471	0.266968	0.012987	0.207547	0.266968	0.307551	0.345455	0.140625	0.345455	0.233333	0.309091	0.309091	0.237288	0.237288	0.166667	0.166667	0.254545	0.181818	0.22807	0.323077	0.203125	0.203125	0.344262	0.255411	0	0.098592	0.019608	0.096774	0.007407	0.149254	0.295082	0.117647	0.169014	0.271057	0.205882	0.083969	0.205128	0.216667	0.15625	0.216216
D10190	0.263158	0.178571	0.230769	0.230769	0.145833	0.224138	0.170732	0.215686	0.2	0.125	0.287129	0	0.176471	0.287129	0.277014	0.268657	0.155172	0.268657	0.214286	0.245283	0.245283	0.288462	0.288462	0.197183	0.197183	0.235294	0.2	0.306122	0.225115	0.267857	0.267857	0.239804	0.285714	0	0.090909	0	0.068966	0.007752	0.092308	0.210614	0.09375	0.132353	0.350877	0.245902	0.0625	0.200546	0.155172	0.096774	0.212121
D10224	0.222222	0.123288	0.171303	0.171303	0.126984	0.298507	0.122807	0.164179	0.15493	0.147541	0.17061	0.023256	0.174603	0.17061	0.25972	0.253731	0.185714	0.253731	0.183099	0.223881	0.223881	0.136986	0.136986	0.278481	0.278481	0.19697	0.239437	0.212121	0.371429	0.279412	0.279412	0.393939	0.24359	0	0.128205	0.068966	0.083333	0	0.208333	0.271429	0.146667	0.207792	0.24	0.210526	0.151515	0.209302	0.202899	0.217391	0.219512
D00152	0.095238	0.111111	0.117647	0.117647	0.074074	0.097561	0.222222	0.125	0.111111	0.076923	0.130435	0	0.142857	0.130435	0.104816	0.096606	0.090426	0.096606	0.096606	0.101928	0.101928	0.093333	0.093333	0.064982	0.064982	0.111111	0.069767	0.107872	0.071429	0.06383	0.06383	0.077586	0.070039	0	0.045455	0	0.114551	0	0.089588	0.08545	0.047619	0.085106	0.085106	0.111111	0.028037	0.068966	0.099196	0.096606	0.074074
D00153	0.050847	0.018182	0	0	0.071429	0.070175	0	0.04	0.037037	0	0	0.127273	0	0	0	0	0.055556	0	0	0	0	0	0	0.102941	0.102941	0	0.068966	0.038462	0.029412	0.033898	0.033898	0.03125	0.028986	0	0.068966	0.125	0	0.016949	0.089286	0.067797	0.034483	0.063492	0	0.015385	0.058824	0	0.096154	0.09434	0
D00156	0.056338	0.014706	0	0	0.054545	0.057143	0	0.031746	0.029851	0	0	0.071429	0	0	0	0	0.044776	0	0.028986	0	0	0.029412	0.029412	0.113924	0.113924	0	0.071429	0.030769	0.024691	0.027778	0.027778	0.025974	0.02439	0.045455	0.086957	0.139535	0	0.023077	0.072464	0.055556	0.028169	0.081081	0	0.039474	0.069231	0	0.044776	0.109375	0
D00321	0.046875	0	0.035088	0.035088	0.086957	0.1	0.02381	0.055556	0.051724	0.042553	0.028169	0.116667	0.039216	0.028169	0.034483	0.032787	0.050847	0.032787	0.032787	0.033898	0.033898	0	0	0.126761	0.126761	0.035714	0.080645	0.072727	0.056338	0.064516	0.064516	0.059701	0.055556	0	0.080645	0.108108	0	0.01626	0.137931	0.079365	0.083333	0.090909	0.028571	0.014286	0.082645	0.012195	0.087719	0.145455	0.012821
D00351	0.222222	0.121643	0.183533	0.183533	0.111111	0.333333	0.152174	0.218182	0.20339	0.092593	0.169014	0.026667	0.166667	0.169014	0.25	0.237288	0.180328	0.237288	0.177419	0.224138	0.224138	0.155698	0.155698	0.216216	0.216216	0.192982	0.222222	0.254545	0.349206	0.245902	0.245902	0.372881	0.228571	0	0.132353	0.0625	0.098361	0.022727	0.1875	0.258065	0.136364	0.205882	0.223881	0.191176	0.093023	0.192308	0.309091	0.196721	0.202703
D00410	0.170213	0.13164	0.205128	0.205128	0.151515	0.148936	0.192308	0.116625	0.106095	0.15625	0.244898	0	0.28125	0.244898	0.297297	0.307692	0.154734	0.307692	0.159091	0.195122	0.195122	0.111111	0.111111	0.114754	0.114754	0.179487	0.145833	0.157635	0.235294	0.166307	0.166307	0.255319	0.185185	0	0.078431	0	0.097561	0	0.102041	0.142857	0.104167	0.153846	0.153846	0.134615	0.0625	0.145161	0.162791	0.108696	0.155172
D00420	0.217391	0.210654	0.221374	0.221374	0.114286	0.25	0.185185	0.243243	0.219512	0.117647	0.169811	0	0.235294	0.169811	0.324324	0.3	0.151242	0.3	0.3	0.315789	0.315789	0.151242	0.151242	0.095238	0.095238	0.342857	0.12	0.142857	0.207547	0.162791	0.162791	0.22449	0.140351	0	0.076923	0	0.15	0	0.122449	0.212766	0.08	0.173077	0.173077	0.153846	0.071429	0.16129	0.214286	0.130435	0.172414
D00574	0.122449	0.088889	0.093023	0.093023	0.151515	0.102041	0.148148	0.25	0.225	0.121212	0.070175	0.078431	0.108108	0.070175	0.142857	0.133333	0.136364	0.133333	0.133333	0.139535	0.139535	0.086957	0.086957	0.114754	0.114754	0.15	0.1	0.103286	0.125	0.08	0.08	0.134615	0.084746	0	0.078431	0.035714	0.184211	0	0.173913	0.217391	0.104167	0.111111	0.071429	0.092593	0.04386	0.109375	0.190476	0.159091	0.116667
D00781	0.072727	0.081633	0.133333	0.133333	0.135135	0.09434	0.296296	0.139535	0.12766	0.078947	0.083333	0	0.125	0.083333	0.099366	0.093439	0.102041	0.093439	0.122449	0.12766	0.12766	0.125	0.125	0.090909	0.090909	0.136364	0.092593	0.108696	0.080645	0.09434	0.09434	0.086207	0.079365	0	0.092593	0	0.081678	0	0.08818	0.090909	0.055556	0.113043	0.103448	0.105263	0.033613	0.119403	0.073559	0.072125	0.126984
D00786	0.183673	0.181818	0.282051	0.282051	0.171429	0.212766	0.36	0.333333	0.3	0.142857	0.207547	0	0.239437	0.207547	0.29771	0.276596	0.152174	0.276596	0.255814	0.3	0.3	0.232558	0.232558	0.126984	0.126984	0.289474	0.16	0.190476	0.222222	0.212766	0.212766	0.24	0.196429	0	0.09434	0	0.142857	0	0.14	0.229167	0.098039	0.145455	0.188679	0.169811	0.051724	0.193548	0.232558	0.148936	0.206897
D00960	0.111111	0.08	0.155556	0.155556	0.04878	0.092593	0.125	0.098901	0.090909	0.05	0.178571	0	0.082353	0.178571	0.144708	0.135903	0.145833	0.135903	0.091618	0.073559	0.073559	0.1	0.1	0.073529	0.073529	0.101512	0.071429	0.12311	0.114754	0.072727	0.072727	0.122807	0.15	0	0.034483	0	0.079914	0	0.086556	0.083481	0.054545	0.065574	0.113014	0.066667	0.033333	0.064426	0.072125	0.091618	0.068249
D00963	0.050847	0.037037	0	0	0.071429	0.051724	0	0.04	0.037037	0	0	0.107143	0	0	0	0	0.055556	0	0	0	0	0	0	0.086957	0.086957	0	0.050847	0.038462	0.029412	0.033898	0.033898	0.03125	0.028986	0	0.068966	0.125	0	0.016949	0.070175	0.086207	0.034483	0.063492	0	0.015385	0.05	0	0.075472	0.074074	0
D00964	0.22	0.138716	0.169978	0.169978	0.073171	0.153846	0.121212	0.205674	0.187905	0.102564	0.196429	0	0.205128	0.196429	0.285714	0.266667	0.135903	0.266667	0.212766	0.222222	0.222222	0.135903	0.135903	0.072464	0.072464	0.238095	0.089286	0.113445	0.210526	0.104972	0.104972	0.226415	0.186441	0	0.051724	0	0.133333	0	0.111111	0.265306	0.072727	0.137931	0.178571	0.140351	0.05042	0.166667	0.191489	0.117647	0.177419
D01134	0.045455	0.032787	0.033898	0.033898	0.083333	0.096774	0.022727	0.017241	0.016129	0.040816	0.027397	0.045455	0.037736	0.027397	0.033333	0.031746	0.04918	0.031746	0.065574	0.032787	0.032787	0.032258	0.032258	0.108108	0.108108	0.034483	0.078125	0.070175	0.054795	0.0625	0.0625	0.057971	0.054054	0.052632	0.112903	0.162162	0	0.03252	0.133333	0.060606	0.080645	0.121212	0.027778	0.042857	0.099174	0.011905	0.066667	0.181818	0.0125
D01180	0.048387	0.017241	0	0	0.066667	0.066667	0	0.018519	0.017241	0	0	0.048387	0	0	0	0	0.052632	0	0	0	0	0	0	0.083333	0.083333	0	0.065574	0.036364	0.028169	0.032258	0.032258	0.029851	0.027778	0	0.065574	0.114286	0	0.033613	0.084746	0.047619	0.032787	0.060606	0	0.014706	0.066116	0	0.034483	0.089286	0
D01259	0.086957	0.1	0.166667	0.166667	0.178571	0.13164	0.238095	0.176471	0.157895	0.142857	0.12	0	0.142857	0.12	0.122715	0.113801	0.116625	0.113801	0.121951	0.119593	0.119593	0.153846	0.153846	0.105263	0.105263	0.138889	0.136364	0.135135	0.09434	0.113636	0.113636	0.102041	0.092593	0	0.111111	0	0.101928	0	0.106095	0.101512	0.066667	0.111111	0.1	0.102041	0.045872	0.1	0.116625	0.08747	0.107143
D01899	0.051282	0.013333	0	0	0.048387	0.051948	0	0.028571	0.027027	0.015873	0	0.064935	0	0	0.027397	0	0.054795	0	0.04	0.013333	0.013333	0.040541	0.040541	0.104651	0.104651	0.013889	0.064935	0.027778	0.022727	0.038462	0.038462	0.02381	0.022472	0.081633	0.093333	0.12	0.058824	0.029412	0.109589	0.050633	0.038961	0.0875	0	0.04878	0.081481	0.042553	0.040541	0.114286	0.044444
D02451	0.191489	0.111111	0.142857	0.142857	0.147059	0.145833	0.142857	0.210526	0.190476	0.117647	0.148148	0.037037	0.135135	0.148148	0.225	0.209302	0.214286	0.209302	0.155556	0.162791	0.162791	0.108696	0.108696	0.131148	0.131148	0.175	0.217391	0.182266	0.185185	0.115619	0.115619	0.2	0.160714	0	0.12	0.071429	0.15	0	0.195652	0.212766	0.148936	0.173077	0.12963	0.111111	0.071429	0.142857	0.214286	0.209302	0.152542
D03107	0.142857	0.111111	0.116279	0.116279	0.147059	0.195652	0.230769	0.179487	0.162791	0.085714	0.107143	0.076923	0.105263	0.107143	0.088889	0.083333	0.186047	0.083333	0.083333	0.086957	0.086957	0.133333	0.133333	0.232143	0.232143	0.093023	0.142857	0.170732	0.163636	0.145833	0.145833	0.176471	0.140351	0	0.191489	0.153846	0.095238	0.00885	0.195652	0.212766	0.125	0.196078	0.109091	0.153846	0.090909	0.090909	0.243902	0.209302	0.096774
D03241	0.076923	0.086957	0.142857	0.142857	0.147059	0.122449	0.333333	0.15	0.136364	0.117647	0.087719	0	0.135135	0.087719	0.106095	0.099366	0.085106	0.099366	0.130435	0.136364	0.136364	0.133333	0.133333	0.078125	0.078125	0.146341	0.12	0.116279	0.084746	0.1	0.1	0.090909	0.083333	0	0.098039	0	0.062356	0	0.093439	0.096154	0.08	0.099099	0.089286	0.090909	0.043478	0.074627	0.078224	0.099366	0.079365
D03749	0.05	0.017857	0	0	0.069767	0.068966	0	0.039216	0.036364	0	0	0.086207	0	0	0	0	0.054545	0	0	0	0	0	0	0.117647	0.117647	0	0.086207	0.037736	0.028986	0.033333	0.033333	0.030769	0.028571	0	0.067797	0.121212	0	0.016807	0.087719	0.103448	0.033898	0.0625	0	0.015152	0.058333	0	0.074074	0.092593	0
D03778	0.25	0.107544	0.149228	0.149228	0.09434	0.174603	0.085106	0.197053	0.183533	0.075472	0.203566	0.041667	0.150943	0.203566	0.236364	0.267857	0.180438	0.267857	0.163934	0.169492	0.169492	0.105845	0.105845	0.128205	0.128205	0.178571	0.190476	0.163194	0.257576	0.133231	0.133231	0.274194	0.2	0	0.102941	0.088889	0.101695	0	0.174603	0.288136	0.106061	0.19403	0.19403	0.112676	0.094488	0.166667	0.186441	0.183333	0.175676
D03781	0.173913	0.108696	0.136364	0.136364	0.070588	0.114583	0.076923	0.126437	0.120879	0.046512	0.2	0	0.13253	0.2	0.134831	0.168539	0.092259	0.168539	0.142857	0.096774	0.096774	0.144444	0.144444	0.080357	0.080357	0.125	0.08	0.09529	0.16	0.103093	0.103093	0.166667	0.132623	0.025974	0.058824	0.025	0.042553	0.024691	0.038835	0.10101	0.039216	0.097087	0.173416	0.178947	0.061728	0.107143	0.072917	0.061224	0.111111
D03784	0.265306	0.191489	0.255814	0.255814	0.153846	0.196078	0.1875	0.223529	0.204301	0.1	0.247706	0	0.263158	0.247706	0.222222	0.234043	0.180124	0.234043	0.183673	0.166667	0.166667	0.2	0.2	0.102941	0.102941	0.204545	0.107143	0.166307	0.25	0.166348	0.166348	0.269231	0.224138	0	0.068966	0	0.083333	0	0.070175	0.166667	0.071429	0.135593	0.264151	0.222222	0.058824	0.181818	0.14	0.074074	0.193548
D03786	0.235294	0.133201	0.270208	0.270208	0.121951	0.192308	0.181818	0.232558	0.212766	0.097561	0.189655	0	0.195122	0.189655	0.272727	0.282609	0.176471	0.282609	0.204082	0.212766	0.212766	0.176471	0.176471	0.101449	0.101449	0.227273	0.125	0.145833	0.245614	0.141805	0.141805	0.264151	0.220339	0	0.067797	0	0.12766	0	0.107143	0.230769	0.070175	0.133333	0.236364	0.175439	0.049587	0.215385	0.183673	0.113208	0.229508
D04035	0.0625	0.016393	0	0	0.0625	0.063492	0	0.017544	0.016393	0	0	0.046154	0	0	0	0	0.05	0	0	0	0	0	0	0.08	0.08	0	0.0625	0.034483	0.027027	0.030769	0.030769	0.028571	0.026667	0	0.079365	0.105263	0	0.008	0.080645	0.045455	0.03125	0.057971	0	0.014085	0.047619	0	0.032787	0.084746	0
D05019	0.123077	0.092985	0.140351	0.140351	0.098039	0.107692	0.113636	0.080617	0.075441	0.1	0.179104	0	0.18	0.179104	0.2	0.210526	0.109299	0.210526	0.189655	0.135593	0.135593	0.109299	0.109299	0.088608	0.088608	0.122807	0.106061	0.109215	0.173913	0.119751	0.119751	0.184615	0.138889	0.047619	0.089552	0.044444	0.067797	0.031496	0.074627	0.104478	0.075758	0.147059	0.114286	0.132353	0.096	0.1125	0.114754	0.112903	0.118421
D07260	0.050847	0.018182	0	0	0.071429	0.070175	0	0.04	0.037037	0	0	0.107143	0	0	0	0	0.055556	0	0	0	0	0	0	0.119403	0.119403	0	0.087719	0.038462	0.029412	0.033898	0.033898	0.03125	0.028986	0	0.068966	0.125	0	0.016949	0.089286	0.105263	0.034483	0.063492	0	0.015385	0.058824	0	0.075472	0.09434	0
D07615	0.051282	0.013333	0	0	0.048387	0.051948	0	0.028571	0.027027	0.015873	0	0.064935	0	0	0.027397	0	0.054795	0	0.04	0.013333	0.013333	0.040541	0.040541	0.104651	0.104651	0.013889	0.064935	0.027778	0.022727	0.038462	0.038462	0.02381	0.022472	0.081633	0.093333	0.12	0.058824	0.029412	0.109589	0.050633	0.038961	0.0875	0	0.04878	0.081481	0.042553	0.040541	0.114286	0.044444
D07940	0.191489	0.111111	0.142857	0.142857	0.147059	0.145833	0.142857	0.210526	0.190476	0.117647	0.148148	0.037037	0.135135	0.148148	0.225	0.209302	0.214286	0.209302	0.155556	0.162791	0.162791	0.108696	0.108696	0.131148	0.131148	0.175	0.217391	0.182266	0.185185	0.115619	0.115619	0.2	0.160714	0	0.12	0.071429	0.15	0	0.195652	0.212766	0.148936	0.173077	0.12963	0.111111	0.071429	0.142857	0.214286	0.209302	0.152542
D08369	0.086957	0.1	0.105263	0.105263	0.064516	0.088889	0.181818	0.111111	0.173333	0.066667	0.12	0	0.125	0.12	0.094148	0.08747	0.081731	0.08747	0.08747	0.091811	0.091811	0.084337	0.084337	0.060606	0.060606	0.099196	0.06383	0.096606	0.066176	0.058315	0.058315	0.071429	0.064982	0	0.041667	0	0.101928	0	0.081678	0.078224	0.043478	0.078431	0.078431	0.102041	0.027027	0.064516	0.089588	0.08747	0.068966
D09701	0.111111	0.084746	0.068966	0.068966	0.12766	0.095238	0.069767	0.071429	0.066667	0.083333	0.085714	0.044776	0.076923	0.085714	0.145455	0.1	0.12069	0.1	0.047619	0.04918	0.04918	0.048387	0.048387	0.136986	0.136986	0.051724	0.129032	0.082024	0.114286	0.095238	0.095238	0.121212	0.097222	0	0.129032	0.1	0.090909	0.015873	0.169492	0.075758	0.096774	0.136364	0.056338	0.088235	0.080645	0.075	0.083333	0.137931	0.078947
D09915	0.153846	0.125	0.155556	0.155556	0.162162	0.204082	0.2	0.219512	0.2	0.076923	0.118644	0.016949	0.15	0.118644	0.104167	0.11332	0.170213	0.11332	0.135903	0.148936	0.148936	0.222222	0.222222	0.140625	0.140625	0.151242	0.2	0.130435	0.152542	0.156863	0.156863	0.163636	0.131148	0	0.153846	0.0625	0.086957	0.008547	0.156863	0.22	0.09434	0.203704	0.140351	0.163636	0.068966	0.085714	0.1	0.166667	0.090909
D10125	0.163934	0.12069	0.105263	0.105263	0.173913	0.147541	0.093023	0.089286	0.083333	0.081633	0.1	0.044118	0.075472	0.1	0.122807	0.116667	0.157895	0.116667	0.098361	0.101695	0.101695	0.064516	0.064516	0.150685	0.150685	0.107143	0.145161	0.105263	0.112676	0.111111	0.111111	0.119403	0.111111	0	0.145161	0.097561	0.070175	0.02381	0.147541	0.107692	0.095238	0.169231	0.085714	0.071429	0.115702	0.0875	0.1	0.155172	0.092105
D10146	0.285714	0.163265	0.27907	0.27907	0.243243	0.215686	0.258065	0.232558	0.212766	0.153846	0.301887	0.016129	0.215881	0.301887	0.302326	0.282609	0.16	0.282609	0.204082	0.23913	0.23913	0.176471	0.176471	0.1875	0.1875	0.227273	0.166667	0.222222	0.290909	0.208577	0.208577	0.313725	0.285714	0	0.105263	0.027778	0.104167	0	0.148148	0.230769	0.12963	0.214286	0.259259	0.196429	0.076271	0.19697	0.26087	0.156863	0.209677
D00155	0.108987	0.019608	0.06383	0.06383	0.078947	0.069418	0.030303	0.043478	0.04	0	0.066667	0.035714	0	0.066667	0.040816	0.038462	0.104167	0.038462	0.018868	0.019608	0.019608	0.019231	0.019231	0.087289	0.087289	0.020833	0.115385	0.111111	0.03125	0.055556	0.055556	0.033333	0.058452	0	0.09434	0.09215	0	0.054545	0.049724	0.035088	0.018182	0.062395	0.05	0.033333	0.06087	0.042254	0.019231	0.052632	0.044776
D00224	0.116279	0.076923	0.111111	0.111111	0.148148	0.093023	0.090909	0.117647	0.105263	0.034483	0.102041	0	0.030303	0.102041	0.108108	0.128205	0.102564	0.128205	0.073171	0.076923	0.076923	0.075	0.075	0.070175	0.070175	0.083333	0.116279	0.142857	0.098039	0.093023	0.093023	0.106383	0.096154	0	0.066667	0	0.027027	0	0.021739	0.065217	0.022222	0.039216	0.104167	0.061224	0.018182	0.084746	0.02381	0.023256	0.090909
D00227	0.114754	0.068966	0.111111	0.111111	0.0625	0.080645	0.023256	0.09434	0.087719	0.020408	0.104478	0	0	0.104478	0.033898	0.084746	0.105263	0.084746	0.066667	0.050847	0.050847	0.05	0.05	0.065789	0.065789	0.072727	0.152542	0.111111	0.070423	0.080645	0.080645	0.074627	0.069444	0.054054	0.046154	0.02439	0.017544	0	0	0.078125	0.015385	0.013889	0.15873	0.058824	0.015385	0.090909	0	0	0.09589
D00231	0.209302	0.210526	0.189189	0.189189	0.166667	0.214286	0.217391	0.235294	0.210526	0.133333	0.16	0	0.225806	0.16	0.216216	0.230769	0.166253	0.230769	0.170732	0.179487	0.179487	0.175	0.175	0.101695	0.101695	0.194444	0.130435	0.157895	0.153846	0.133333	0.133333	0.166667	0.150943	0	0.083333	0	0.105263	0	0.085106	0.152174	0.086957	0.163265	0.163265	0.142857	0.054545	0.133333	0.146341	0.090909	0.142857
D00302	0.117647	0.029412	0.046154	0.046154	0.113208	0.136364	0.019608	0.064516	0.060606	0.054545	0.078947	0.013333	0	0.078947	0.014706	0.074627	0.145161	0.074627	0.058824	0.076923	0.076923	0.028986	0.028986	0.141026	0.141026	0.063492	0.225806	0.079365	0.12	0.209677	0.209677	0.126761	0.103896	0.044444	0.070423	0.041667	0.03125	0	0.086957	0.149254	0.057143	0.094595	0.08	0.111111	0.09375	0.108434	0.075758	0.090909	0.113924
D00371	0.108696	0.046512	0.131579	0.131579	0.096774	0.086957	0.038462	0.078947	0.071429	0	0.075472	0	0	0.075472	0.047619	0.068182	0.095238	0.068182	0.044444	0.046512	0.046512	0.045455	0.045455	0.04918	0.04918	0.05	0.133333	0.075	0.053571	0.06383	0.06383	0.057692	0.052632	0	0.040816	0	0	0	0	0.106383	0	0.018182	0.098039	0.057692	0.008772	0.098361	0	0	0.105263
D00417	0.173913	0.230769	0.179487	0.179487	0.193548	0.177778	0.2	0.222222	0.2	0.125	0.153846	0	0.176471	0.153846	0.146341	0.162791	0.139535	0.162791	0.25	0.170732	0.170732	0.139535	0.139535	0.098361	0.098361	0.285714	0.173913	0.179487	0.148148	0.152174	0.152174	0.16	0.145455	0	0.08	0	0.1	0	0.081633	0.115619	0.083333	0.134615	0.156863	0.115385	0.044248	0.111111	0.113636	0.086957	0.118644
D00528	0.106383	0.022222	0.128205	0.128205	0.060606	0.085106	0.037037	0.05	0.045455	0	0.074074	0	0	0.074074	0.046512	0.066667	0.093023	0.066667	0.043478	0.045455	0.045455	0.044444	0.044444	0.048387	0.048387	0.04878	0.130435	0.073171	0.052632	0.0625	0.0625	0.056604	0.051724	0	0.04	0	0	0	0	0.104167	0	0.017857	0.117647	0.056604	0.008696	0.096774	0	0	0.103448
D00718	0.232143	0.166667	0.173077	0.173077	0.181818	0.283019	0.097561	0.229167	0.211538	0.159091	0.153846	0.014706	0.222222	0.153846	0.215686	0.160714	0.230769	0.160714	0.226415	0.235294	0.235294	0.142857	0.142857	0.15493	0.15493	0.25	0.210526	0.12963	0.241935	0.275797	0.275797	0.258621	0.238095	0.025641	0.15	0.04878	0.156863	0	0.192982	0.22807	0.175439	0.193548	0.174603	0.196721	0.108333	0.148649	0.142857	0.140351	0.157143
D01133	0.27451	0.255319	0.156187	0.156187	0.2	0.254902	0.171429	0.364764	0.331828	0.093023	0.163934	0.065574	0.186047	0.163934	0.208333	0.244898	0.2	0.244898	0.244898	0.229167	0.229167	0.22449	0.22449	0.181818	0.181818	0.272727	0.160714	0.163265	0.216667	0.142857	0.142857	0.232143	0.213115	0	0.101695	0.026316	0.122449	0.008197	0.122807	0.294118	0.086207	0.147541	0.186441	0.232143	0.057377	0.208955	0.22449	0.12963	0.222222
D01198	0.218182	0.244898	0.229167	0.229167	0.136364	0.269231	0.162162	0.286682	0.26294	0.088889	0.196721	0	0.177778	0.196721	0.25	0.235294	0.163227	0.235294	0.3125	0.270833	0.270833	0.347826	0.347826	0.142857	0.142857	0.318182	0.116667	0.156863	0.209677	0.112985	0.112985	0.224138	0.225806	0	0.098361	0	0.096154	0.01626	0.1	0.172414	0.12069	0.180328	0.220339	0.224138	0.082645	0.185714	0.148148	0.105263	0.19697
D01712	0.102041	0.043478	0.121951	0.121951	0.088235	0.081633	0.034483	0.073171	0.066667	0	0.071429	0	0	0.071429	0.044444	0.06383	0.088889	0.06383	0.086957	0.043478	0.043478	0.088889	0.088889	0.046875	0.046875	0.046512	0.125	0.069767	0.050847	0.06	0.06	0.054545	0.05	0.086957	0.08	0.076923	0	0.018182	0	0.1	0	0.053571	0.092593	0.09434	0.035088	0.09375	0	0.041667	0.1
D01771	0.1	0.020833	0.146341	0.146341	0.055556	0.08	0.033333	0.046512	0.042553	0	0.070175	0.018519	0	0.070175	0.043478	0.0625	0.086957	0.0625	0.085106	0.042553	0.042553	0.041667	0.041667	0.0625	0.0625	0.045455	0.122449	0.068182	0.05	0.058824	0.058824	0.053571	0.04918	0	0.057692	0	0	0	0	0.098039	0.019231	0.034483	0.111111	0.053571	0.017094	0.092308	0	0	0.098361
D01783	0.156863	0.12766	0.085106	0.085106	0.166667	0.208333	0.206897	0.195122	0.177778	0.078947	0.101695	0.113208	0.097561	0.101695	0.083333	0.078431	0.173913	0.078431	0.078431	0.104167	0.104167	0.173913	0.173913	0.241379	0.241379	0.086957	0.204082	0.186047	0.135593	0.115385	0.115385	0.145455	0.152542	0	0.204082	0.137931	0.088889	0.017391	0.183673	0.2	0.117647	0.230769	0.103448	0.145455	0.088496	0.086957	0.173913	0.195652	0.092308
D01896	0.175439	0.089286	0.113208	0.113208	0.162791	0.222222	0.162162	0.1875	0.173077	0.139535	0.106061	0.080645	0.081633	0.106061	0.090909	0.086207	0.24	0.086207	0.105263	0.150943	0.150943	0.107143	0.107143	0.19403	0.19403	0.115385	0.218182	0.18	0.136364	0.137931	0.137931	0.145161	0.151515	0.085714	0.196429	0.108108	0.14	0.008065	0.2	0.236364	0.140351	0.180328	0.142857	0.126984	0.110169	0.152778	0.148148	0.211538	0.161765
D02008	0.224138	0.203704	0.166667	0.166667	0.148936	0.296296	0.146341	0.270833	0.25	0.081633	0.166667	0.075758	0.163265	0.166667	0.185185	0.196429	0.151832	0.196429	0.264151	0.226415	0.226415	0.178571	0.178571	0.183099	0.183099	0.291667	0.163934	0.145455	0.19697	0.141925	0.141925	0.209677	0.19403	0	0.126984	0.022727	0.070175	0	0.09375	0.263158	0.095238	0.169231	0.169231	0.209677	0.097561	0.12987	0.245283	0.098361	0.136986
D02017	0.096154	0.040816	0.113636	0.113636	0.081081	0.076923	0.03125	0.068182	0.0625	0.026316	0.067797	0	0	0.067797	0.041667	0.06	0.130435	0.06	0.06	0.0625	0.0625	0.04	0.04	0.044776	0.044776	0.066667	0.117647	0.065217	0.048387	0.098039	0.098039	0.051724	0.047619	0.037037	0.055556	0	0.021739	0	0	0.09434	0.018519	0.016393	0.087719	0.051724	0.016807	0.106061	0	0	0.112903
D02042	0.234043	0.238095	0.190476	0.190476	0.171429	0.212766	0.172414	0.230769	0.209302	0.111111	0.185185	0	0.148825	0.185185	0.186047	0.2	0.152174	0.2	0.255814	0.181818	0.181818	0.152174	0.152174	0.109375	0.109375	0.289474	0.208333	0.219512	0.178571	0.163265	0.163265	0.192308	0.175439	0	0.074074	0	0.090909	0	0.075472	0.156863	0.076923	0.125	0.211538	0.148148	0.051724	0.138462	0.104167	0.08	0.147541
D02084	0.1875	0.186047	0.166667	0.166667	0.142857	0.191489	0.178571	0.205128	0.186047	0.147059	0.145455	0	0.194444	0.145455	0.190476	0.204545	0.200924	0.204545	0.232558	0.186047	0.186047	0.238095	0.238095	0.09375	0.09375	0.2	0.117647	0.139535	0.140351	0.166667	0.166667	0.150943	0.137931	0.166667	0.14	0.068966	0.119048	0.017699	0.076923	0.137255	0.1	0.215686	0.148148	0.196078	0.080357	0.140625	0.130435	0.152174	0.15
D02085	0.156863	0.204545	0.159091	0.159091	0.166667	0.16	0.166667	0.195122	0.177778	0.108108	0.140351	0.017241	0.153846	0.140351	0.130435	0.145833	0.125	0.145833	0.375	0.152174	0.152174	0.173913	0.173913	0.107692	0.107692	0.25	0.156863	0.159091	0.135593	0.137255	0.137255	0.145455	0.133333	0.071429	0.113208	0.064516	0.088889	0.017391	0.074074	0.104972	0.075472	0.163636	0.142857	0.145455	0.069565	0.102941	0.102041	0.122449	0.109375
D02218	0.28	0.208333	0.217391	0.217391	0.119048	0.285714	0.176471	0.255814	0.234043	0.095238	0.22807	0	0.162791	0.22807	0.231102	0.276596	0.18	0.276596	0.2	0.234043	0.234043	0.439024	0.439024	0.166667	0.166667	0.222222	0.163636	0.191489	0.220339	0.139241	0.139241	0.236364	0.237288	0	0.066667	0	0.08	0.008264	0.086207	0.226415	0.087719	0.112903	0.254545	0.259259	0.057851	0.183432	0.134615	0.090909	0.194969
D02229	0.164384	0.112676	0.149254	0.149254	0.114754	0.292308	0.109091	0.153846	0.144928	0.063492	0.123457	0.011905	0.109375	0.123457	0.083333	0.109589	0.19403	0.109589	0.157143	0.128571	0.128571	0.212121	0.212121	0.195122	0.195122	0.134328	0.197183	0.132353	0.223684	0.217391	0.217391	0.236111	0.160494	0.076923	0.164384	0.072727	0.086957	0.036232	0.105263	0.194444	0.077922	0.2	0.139241	0.219178	0.087591	0.147727	0.09589	0.140845	0.154762
D02731	0.213115	0.133333	0.137931	0.137931	0.14	0.303571	0.136364	0.163636	0.152542	0.076923	0.176471	0.013699	0.132075	0.176471	0.098361	0.129032	0.210526	0.129032	0.147541	0.133333	0.133333	0.189655	0.189655	0.242857	0.242857	0.160714	0.254237	0.178571	0.242424	0.280702	0.280702	0.258065	0.202899	0.022727	0.15625	0.043478	0.103448	0.007634	0.123077	0.203852	0.090909	0.179104	0.179104	0.181818	0.061538	0.168831	0.112903	0.111111	0.178082
D02933	0.1	0.113636	0.146341	0.146341	0.117647	0.148936	0.192308	0.216216	0.195122	0.057143	0.070175	0.057692	0.051282	0.070175	0.090909	0.085106	0.086957	0.085106	0.108696	0.113636	0.113636	0.086957	0.086957	0.114754	0.114754	0.121951	0.122449	0.119048	0.105263	0.148936	0.148936	0.113208	0.103448	0	0.122449	0	0.071429	0	0.08	0.142857	0.06	0.111111	0.090909	0.156863	0.04386	0.059701	0.162791	0.085106	0.063492
D02985	0.2	0.125	0.209302	0.209302	0.131579	0.18	0.16129	0.190476	0.173913	0.135135	0.137931	0	0.095238	0.137931	0.177778	0.191489	0.195652	0.191489	0.191489	0.2	0.2	0.122449	0.122449	0.123077	0.123077	0.214286	0.2	0.12311	0.152542	0.156863	0.156863	0.163636	0.112903	0.033333	0.071429	0	0.162791	0	0.134615	0.22	0.09434	0.083333	0.181818	0.122807	0.042017	0.206349	0.122449	0.12	0.220339
D03217	0.254237	0.152542	0.222222	0.222222	0.212766	0.280702	0.162791	0.207547	0.192982	0.12	0.230769	0.027778	0.176471	0.230769	0.264151	0.296296	0.326923	0.296296	0.22807	0.236364	0.236364	0.210526	0.210526	0.279412	0.279412	0.25	0.254237	0.294118	0.301587	0.327273	0.327273	0.322034	0.31746	0	0.15625	0.066667	0.084746	0.015385	0.177419	0.229508	0.2	0.234375	0.274194	0.2	0.131148	0.2	0.254545	0.186441	0.211268
D03260	0.213115	0.133333	0.137931	0.137931	0.14	0.303571	0.136364	0.163636	0.152542	0.076923	0.176471	0.013699	0.132075	0.176471	0.098361	0.129032	0.210526	0.129032	0.147541	0.133333	0.133333	0.189655	0.189655	0.242857	0.242857	0.160714	0.254237	0.178571	0.242424	0.280702	0.280702	0.258065	0.202899	0.022727	0.15625	0.043478	0.103448	0.007634	0.123077	0.203852	0.090909	0.179104	0.179104	0.181818	0.061538	0.168831	0.112903	0.111111	0.178082
D03378	0	0	0.051282	0.051282	0.032258	0.043478	0.041667	0.026316	0.02381	0.107143	0.037736	0	0.060606	0.037736	0.135135	0.046512	0	0.046512	0.046512	0.075	0.075	0	0	0.033333	0.033333	0.052632	0.042553	0.051282	0.036364	0.043478	0.043478	0.039216	0.035714	0	0.020833	0	0.054054	0	0.116279	0.020408	0.093023	0.08	0.038462	0	0.027273	0.065574	0.047619	0.071429	0.070175
D03546	0.134615	0.019231	0.108696	0.108696	0.076923	0.074074	0.029412	0.065217	0.06	0	0.12069	0	0	0.12069	0.061224	0.122449	0.125	0.122449	0.037736	0.039216	0.039216	0.038462	0.038462	0.074627	0.074627	0.041667	0.156863	0.133333	0.080645	0.137255	0.137255	0.086207	0.079365	0	0.035088	0.03125	0	0.054054	0	0.071429	0	0.032258	0.122807	0.067797	0.033613	0.071429	0.038462	0	0.075758
D03657	0.216667	0.116667	0.160714	0.160714	0.142857	0.220339	0.139535	0.166667	0.155172	0.078431	0.161765	0.028169	0.092593	0.161765	0.1	0.15	0.283019	0.15	0.131148	0.135593	0.135593	0.192982	0.192982	0.211268	0.211268	0.142857	0.258621	0.181818	0.157143	0.180328	0.180328	0.166667	0.171429	0.023256	0.123077	0.068182	0.105263	0.031496	0.142857	0.207178	0.126984	0.130435	0.2	0.166667	0.07874	0.141026	0.114754	0.131148	0.148649
D03828	0.166667	0.142857	0.265306	0.265306	0.177778	0.210526	0.15	0.276596	0.254902	0.181818	0.169231	0	0.142857	0.169231	0.26	0.269231	0.181818	0.269231	0.375	0.254902	0.254902	0.203704	0.203704	0.152778	0.152778	0.326087	0.166667	0.135531	0.21875	0.204188	0.204188	0.233333	0.179104	0.138889	0.166667	0.047619	0.153846	0.032258	0.15	0.183333	0.172414	0.190476	0.171875	0.193548	0.12605	0.178082	0.160714	0.222222	0.188406
D03898	0.09434	0.019608	0.111111	0.111111	0.078947	0.096154	0.030303	0.066667	0.061224	0	0.066667	0.017544	0	0.066667	0.040816	0.058824	0.12766	0.058824	0.038462	0.04	0.04	0.039216	0.039216	0.075758	0.075758	0.042553	0.137255	0.162791	0.064516	0.075472	0.075472	0.068966	0.063492	0	0.054545	0.066667	0	0.017544	0.017857	0.113208	0.018182	0.05	0.105263	0.068966	0.016667	0.088235	0.06	0.018868	0.09375
D04004	0.122449	0.195122	0.175	0.175	0.225806	0.2	0.24	0.25	0.225	0.15625	0.150943	0	0.138889	0.150943	0.230769	0.214286	0.111111	0.214286	0.275	0.225	0.225	0.111111	0.111111	0.114754	0.114754	0.314286	0.195652	0.129808	0.188679	0.141649	0.141649	0.204082	0.142857	0	0.078431	0	0.153846	0	0.148936	0.191489	0.104167	0.111111	0.132075	0.092593	0.04386	0.126984	0.190476	0.159091	0.135593
D04185	0.156863	0.12766	0.085106	0.085106	0.166667	0.183673	0.206897	0.139535	0.12766	0.078947	0.101695	0.035088	0.097561	0.101695	0.130435	0.078431	0.173913	0.078431	0.078431	0.104167	0.104167	0.173913	0.173913	0.180328	0.180328	0.086957	0.18	0.159091	0.135593	0.115385	0.115385	0.145455	0.152542	0	0.134615	0.137931	0.139535	0.017391	0.234043	0.176471	0.117647	0.185185	0.103448	0.166667	0.069565	0.136364	0.125	0.195652	0.145161
D04245	0.09434	0.083333	0.086957	0.086957	0.138889	0.117647	0.0625	0.116279	0.106383	0.025641	0.066667	0.017544	0.023256	0.066667	0.0625	0.08	0.081633	0.08	0.102041	0.083333	0.083333	0.06	0.06	0.075758	0.075758	0.113636	0.115385	0.111111	0.064516	0.096154	0.096154	0.068966	0.063492	0	0.054545	0.032258	0.021277	0.054545	0.017857	0.072727	0.018182	0.05	0.067797	0.068966	0.042735	0.057143	0.039216	0.018868	0.060606
D04508	0.163265	0.125828	0.13164	0.13164	0.111111	0.12	0.137931	0.236842	0.214286	0.114286	0.145455	0.055556	0.131579	0.145455	0.219512	0.204545	0.155556	0.204545	0.152174	0.159091	0.159091	0.092437	0.092437	0.111111	0.111111	0.170732	0.117647	0.123853	0.181818	0.11332	0.11332	0.196078	0.118644	0	0.075472	0.033333	0.146341	0	0.142857	0.234043	0.1	0.127273	0.148148	0.150943	0.052174	0.123077	0.209302	0.152174	0.131148
D04529	0.137255	0.155556	0.086957	0.086957	0.171429	0.14	0.214286	0.2	0.181818	0.081081	0.103448	0.09434	0.1	0.103448	0.085106	0.08	0.104167	0.08	0.08	0.083333	0.083333	0.12766	0.12766	0.126984	0.126984	0.088889	0.09434	0.111111	0.118644	0.096154	0.096154	0.127273	0.116667	0	0.115385	0.032258	0.090909	0	0.096154	0.156863	0.076923	0.125	0.105263	0.148148	0.042735	0.088235	0.12766	0.102041	0.09375
D04628	0.229167	0.292683	0.214286	0.214286	0.235294	0.234043	0.206897	0.25641	0.232558	0.108108	0.226415	0	0.216216	0.226415	0.200924	0.222222	0.173913	0.222222	0.222222	0.204545	0.204545	0.285714	0.285714	0.2	0.2	0.25	0.156863	0.214286	0.240741	0.176471	0.176471	0.235294	0.214286	0	0.113208	0	0.113636	0.008621	0.074074	0.2	0.075472	0.163636	0.207547	0.211538	0.051282	0.171875	0.125	0.078431	0.163934
D04720	0.113208	0.104167	0.085106	0.085106	0.076923	0.09434	0.129032	0.195122	0.177778	0.138889	0.083333	0.072727	0.125	0.083333	0.130435	0.122449	0.125	0.122449	0.122449	0.12766	0.12766	0.08	0.08	0.107692	0.107692	0.136364	0.113208	0.101512	0.098361	0.074074	0.074074	0.105263	0.096774	0	0.092593	0.03125	0.139535	0	0.137255	0.153846	0.096154	0.103448	0.084746	0.105263	0.042373	0.119403	0.173913	0.145833	0.126984
D04751	0.125	0.157895	0.084746	0.084746	0.145833	0.183333	0.170732	0.148148	0.137931	0.148936	0.098592	0.074627	0.09434	0.098592	0.083333	0.079365	0.155172	0.079365	0.096774	0.157895	0.157895	0.098361	0.098361	0.197183	0.197183	0.105263	0.180328	0.163636	0.176471	0.126984	0.126984	0.134328	0.173913	0.04878	0.180328	0.095238	0.169811	0.031746	0.20339	0.196721	0.22807	0.222222	0.115942	0.151515	0.114754	0.173333	0.155172	0.214286	0.135135
D05147	0.163265	0.163265	0.163265	0.163265	0.163265	0.163265	0.163265	0.163265	0.163265	0.163265	0.163265	0.163265	0.163265	0.163265	0.163265	0.163265	0.163265	0.163265	0.163265	0.163265	0.163265	0.163265	0.163265	0.163265	0.163265	0.163265	0.163265	0.163265	0.163265	0.163265	0.163265	0.163265	0.163265	0.163265	0.163265	0.163265	0.163265	0.163265	0.163265	0.163265	0.163265	0.163265	0.163265	0.163265	0.163265	0.163265	0.163265	0.163265	0.163265
D05400	0.145161	0.12069	0.211538	0.211538	0.173913	0.186441	0.119048	0.173077	0.160714	0.120507	0.132353	0.014286	0.075472	0.132353	0.103448	0.135593	0.132075	0.135593	0.233886	0.140351	0.140351	0.137931	0.137931	0.166667	0.166667	0.185468	0.163934	0.188679	0.128571	0.186441	0.186441	0.136364	0.176471	0.135135	0.224138	0.125	0.064572	0.040323	0.105845	0.102603	0.125612	0.1875	0.134328	0.153846	0.125	0.101266	0.137931	0.169284	0.106667
D05429	0.114754	0.068966	0.111111	0.111111	0.0625	0.080645	0.023256	0.09434	0.087719	0.020408	0.104478	0	0	0.104478	0.033898	0.084746	0.105263	0.084746	0.066667	0.050847	0.050847	0.05	0.05	0.065789	0.065789	0.072727	0.152542	0.111111	0.070423	0.080645	0.080645	0.074627	0.069444	0.054054	0.046154	0.02439	0.017544	0	0	0.078125	0.015385	0.013889	0.15873	0.058824	0.015385	0.090909	0	0	0.09589
D05474	0.207547	0.16	0.302326	0.302326	0.205128	0.26	0.25	0.227273	0.208333	0.121951	0.22807	0.032258	0.162791	0.22807	0.266667	0.25	0.229167	0.25	0.176471	0.234043	0.234043	0.255319	0.255319	0.283333	0.283333	0.195652	0.28	0.302326	0.241379	0.285714	0.285714	0.259259	0.280702	0	0.142857	0.117647	0.08	0.016667	0.188679	0.226415	0.148148	0.210526	0.232143	0.214286	0.094017	0.15942	0.229167	0.2	0.169231
D05744	0.203704	0.134615	0.295455	0.295455	0.170732	0.254902	0.242424	0.222222	0.204082	0.119048	0.224138	0.015625	0.159091	0.224138	0.26087	0.244898	0.2	0.244898	0.173077	0.229167	0.229167	0.22449	0.22449	0.278689	0.278689	0.191489	0.203704	0.325581	0.216667	0.254902	0.254902	0.232143	0.254237	0	0.12069	0.083333	0.078431	0.016529	0.142857	0.157895	0.125	0.186441	0.22807	0.210526	0.075	0.157143	0.22449	0.150943	0.166667
D06103	0.108696	0.046512	0.131579	0.131579	0.096774	0.086957	0.038462	0.078947	0.071429	0	0.075472	0	0	0.075472	0.047619	0.068182	0.095238	0.068182	0.044444	0.046512	0.046512	0.045455	0.045455	0.04918	0.04918	0.05	0.133333	0.075	0.053571	0.06383	0.06383	0.057692	0.052632	0	0.040816	0	0	0	0	0.106383	0	0.018182	0.098039	0.057692	0.008772	0.098361	0	0	0.105263
D06104	0.1	0.042553	0.146341	0.146341	0.085714	0.08	0.033333	0.071429	0.065217	0	0.070175	0	0	0.070175	0.043478	0.0625	0.086957	0.0625	0.085106	0.042553	0.042553	0.111111	0.111111	0.046154	0.046154	0.045455	0.122449	0.068182	0.05	0.058824	0.058824	0.053571	0.04918	0.130435	0.078431	0.115385	0	0.018018	0	0.098039	0	0.071429	0.090909	0.113208	0.025862	0.092308	0	0.0625	0.098361
D06132	0.12	0.136364	0.162228	0.162228	0.083333	0.122449	0.185185	0.15	0.136364	0.055556	0.107143	0	0.141304	0.107143	0.106095	0.106383	0.125828	0.106383	0.147903	0.136364	0.136364	0.214286	0.214286	0.112903	0.112903	0.111111	0.091618	0.230769	0.103448	0.122449	0.122449	0.111111	0.101695	0.08	0.098039	0.071429	0.105769	0.036364	0.086957	0.104651	0.038462	0.133829	0.103074	0.169591	0.061947	0.119751	0.125828	0.11588	0.127695
D06503	0.166667	0.142857	0.265306	0.265306	0.177778	0.210526	0.15	0.276596	0.254902	0.181818	0.169231	0	0.142857	0.169231	0.26	0.269231	0.181818	0.269231	0.375	0.254902	0.254902	0.203704	0.203704	0.152778	0.152778	0.326087	0.166667	0.135531	0.21875	0.204188	0.204188	0.233333	0.179104	0.138889	0.166667	0.047619	0.153846	0.032258	0.15	0.183333	0.172414	0.190476	0.171875	0.193548	0.12605	0.178082	0.160714	0.222222	0.188406
D06575	0.22	0.170213	0.152174	0.152174	0.157895	0.25	0.193548	0.159091	0.145833	0.102564	0.135593	0.033898	0.119048	0.135593	0.102041	0.096154	0.191489	0.096154	0.14	0.122449	0.122449	0.166667	0.166667	0.193548	0.193548	0.130435	0.150943	0.177778	0.131148	0.104972	0.104972	0.140351	0.147541	0	0.12963	0.09375	0.085106	0.025862	0.111111	0.169811	0.134615	0.2	0.157895	0.160714	0.068376	0.115942	0.142857	0.117647	0.123077
D06596	0.09434	0.083333	0.086957	0.086957	0.138889	0.117647	0.0625	0.116279	0.106383	0.025641	0.066667	0.017544	0.023256	0.066667	0.0625	0.08	0.081633	0.08	0.102041	0.083333	0.083333	0.06	0.06	0.075758	0.075758	0.113636	0.115385	0.111111	0.064516	0.096154	0.096154	0.068966	0.063492	0	0.054545	0.032258	0.021277	0.054545	0.017857	0.072727	0.018182	0.05	0.067797	0.068966	0.042735	0.057143	0.039216	0.018868	0.060606
D06612	0.073529	0.050263	0.092637	0.092637	0.057377	0.115385	0.051724	0.103001	0.099764	0.084746	0.070423	0.149606	0.081967	0.070423	0.112	0.100775	0.098987	0.100775	0.145161	0.12	0.12	0.082118	0.082118	0.119718	0.119718	0.113821	0.065693	0.073095	0.107914	0.079672	0.079672	0.111111	0.099291	0.035398	0.123077	0.043478	0.0625	0.035533	0.141732	0.148438	0.16129	0.179688	0.070922	0.102941	0.296296	0.087248	0.128	0.173554	0.089655
D07089	0.291667	0.209503	0.227273	0.227273	0.153846	0.244898	0.151515	0.268293	0.244444	0.157895	0.192982	0	0.246753	0.192982	0.241535	0.26087	0.266667	0.26087	0.234043	0.244444	0.244444	0.295455	0.295455	0.171875	0.171875	0.261905	0.169811	0.227273	0.206897	0.173077	0.173077	0.222222	0.183333	0	0.068966	0	0.106383	0.008403	0.109091	0.235294	0.132075	0.127946	0.218182	0.245283	0.067797	0.194487	0.117647	0.09434	0.207178
D07425	0.28	0.208333	0.217391	0.217391	0.119048	0.285714	0.176471	0.255814	0.234043	0.095238	0.22807	0	0.162791	0.22807	0.231102	0.276596	0.18	0.276596	0.2	0.234043	0.234043	0.439024	0.439024	0.166667	0.166667	0.222222	0.163636	0.191489	0.220339	0.139241	0.139241	0.236364	0.237288	0	0.066667	0	0.08	0.008264	0.086207	0.226415	0.087719	0.112903	0.254545	0.259259	0.057851	0.183432	0.134615	0.090909	0.194969
D07439	0.233766	0.171053	0.12987	0.12987	0.068493	0.175	0.092308	0.133333	0.126582	0.054795	0.231707	0	0.109589	0.231707	0.173333	0.22973	0.111111	0.22973	0.1375	0.141026	0.141026	0.25	0.25	0.125	0.125	0.146667	0.117647	0.144737	0.236495	0.101993	0.101993	0.202916	0.223529	0	0.043956	0	0.089744	0.026846	0.05618	0.156627	0.107143	0.086957	0.234568	0.192771	0.046053	0.206522	0.084337	0.05814	0.175824
D07455	0.1	0.113636	0.146341	0.146341	0.117647	0.148936	0.192308	0.216216	0.195122	0.057143	0.070175	0.057692	0.051282	0.070175	0.090909	0.085106	0.086957	0.085106	0.108696	0.113636	0.113636	0.086957	0.086957	0.114754	0.114754	0.121951	0.122449	0.119048	0.105263	0.148936	0.148936	0.113208	0.103448	0	0.122449	0	0.071429	0	0.08	0.142857	0.06	0.111111	0.090909	0.156863	0.04386	0.059701	0.162791	0.085106	0.063492
D07472	0.166667	0.142857	0.265306	0.265306	0.177778	0.189655	0.15	0.276596	0.254902	0.181818	0.169231	0	0.142857	0.169231	0.26	0.269231	0.181818	0.269231	0.375	0.254902	0.254902	0.203704	0.203704	0.152778	0.152778	0.326087	0.166667	0.135531	0.21875	0.204188	0.204188	0.233333	0.179104	0.138889	0.166667	0.047619	0.153846	0.032258	0.15	0.183333	0.172414	0.190476	0.171875	0.193548	0.12605	0.178082	0.160714	0.222222	0.188406
D07564	0.116279	0.076923	0.111111	0.111111	0.148148	0.093023	0.090909	0.117647	0.105263	0.034483	0.102041	0	0.030303	0.102041	0.108108	0.128205	0.102564	0.128205	0.073171	0.076923	0.076923	0.075	0.075	0.070175	0.070175	0.083333	0.116279	0.142857	0.098039	0.093023	0.093023	0.106383	0.096154	0	0.066667	0	0.027027	0	0.021739	0.065217	0.022222	0.039216	0.104167	0.061224	0.018182	0.084746	0.02381	0.023256	0.090909
D07577	0.218425	0.129272	0.133231	0.133231	0.065574	0.157143	0.074074	0.174551	0.163859	0.185185	0.184388	0	0.172414	0.184388	0.315789	0.238095	0.161388	0.238095	0.278689	0.245902	0.245902	0.197512	0.197512	0.067416	0.067416	0.258621	0.078947	0.104478	0.232877	0.105048	0.105048	0.246377	0.166667	0.12766	0.108108	0.037037	0.142857	0.037037	0.094595	0.152778	0.126761	0.16	0.170929	0.178082	0.131783	0.240506	0.132353	0.147059	0.253333
D07603	0.084746	0.017544	0.098039	0.098039	0.044444	0.067797	0.025641	0.038462	0.035714	0	0.060606	0	0	0.060606	0.036364	0.052632	0.072727	0.052632	0.071429	0.035714	0.035714	0.092593	0.092593	0.040541	0.040541	0.037736	0.103448	0.056604	0.043478	0.05	0.05	0.046154	0.042857	0.09375	0.066667	0.055556	0	0.033898	0	0.083333	0	0.061538	0.095238	0.096774	0.04065	0.081081	0	0.052632	0.085714
D07961	0.232143	0.166667	0.173077	0.173077	0.181818	0.283019	0.097561	0.229167	0.211538	0.159091	0.153846	0.014706	0.222222	0.153846	0.215686	0.160714	0.230769	0.160714	0.226415	0.235294	0.235294	0.142857	0.142857	0.15493	0.15493	0.25	0.210526	0.12963	0.241935	0.275797	0.275797	0.258621	0.238095	0.025641	0.15	0.04878	0.156863	0	0.192982	0.22807	0.175439	0.193548	0.174603	0.196721	0.108333	0.148649	0.142857	0.140351	0.157143
D08238	0.291667	0.209503	0.227273	0.227273	0.153846	0.244898	0.151515	0.268293	0.244444	0.157895	0.192982	0	0.246753	0.192982	0.241535	0.26087	0.266667	0.26087	0.234043	0.244444	0.244444	0.295455	0.295455	0.171875	0.171875	0.261905	0.169811	0.227273	0.206897	0.173077	0.173077	0.222222	0.183333	0	0.068966	0	0.106383	0.008403	0.109091	0.235294	0.132075	0.127946	0.218182	0.245283	0.067797	0.194487	0.117647	0.09434	0.207178
D08294	0.234043	0.238095	0.190476	0.190476	0.171429	0.212766	0.172414	0.230769	0.209302	0.111111	0.185185	0	0.148825	0.185185	0.186047	0.2	0.152174	0.2	0.255814	0.181818	0.181818	0.152174	0.152174	0.109375	0.109375	0.289474	0.208333	0.219512	0.178571	0.163265	0.163265	0.192308	0.175439	0	0.074074	0	0.090909	0	0.075472	0.156863	0.076923	0.125	0.211538	0.148148	0.051724	0.138462	0.104167	0.08	0.147541
D08514	0.196721	0.135593	0.181818	0.181818	0.142857	0.358491	0.139535	0.188679	0.175439	0.078431	0.144928	0.013889	0.134615	0.144928	0.1	0.131148	0.236364	0.131148	0.15	0.155172	0.155172	0.192982	0.192982	0.228571	0.228571	0.163636	0.237288	0.160714	0.265625	0.263158	0.263158	0.283333	0.188406	0.023256	0.15873	0.044444	0.105263	0.007692	0.125	0.233333	0.092308	0.181818	0.164179	0.203125	0.062016	0.171053	0.114754	0.112903	0.180556
D08668	0.213115	0.133333	0.137931	0.137931	0.14	0.303571	0.136364	0.163636	0.152542	0.076923	0.176471	0.013699	0.132075	0.176471	0.098361	0.129032	0.210526	0.129032	0.147541	0.133333	0.133333	0.189655	0.189655	0.242857	0.242857	0.160714	0.254237	0.178571	0.242424	0.280702	0.280702	0.258065	0.202899	0.022727	0.15625	0.043478	0.103448	0.007634	0.123077	0.203852	0.090909	0.179104	0.179104	0.181818	0.061538	0.168831	0.112903	0.111111	0.178082
D08860	0.163934	0.181818	0.211538	0.211538	0.148936	0.206897	0.175	0.22	0.203704	0.152174	0.203125	0.028986	0.23913	0.203125	0.207547	0.196429	0.132075	0.196429	0.196429	0.226415	0.226415	0.294118	0.294118	0.2	0.2	0.215686	0.145161	0.211538	0.19697	0.180438	0.180438	0.190476	0.19403	0	0.163934	0	0.109091	0.015748	0.111111	0.241379	0.112903	0.206349	0.206349	0.171875	0.08	0.175676	0.178571	0.098361	0.169014
D09020	0.226415	0.092593	0.163265	0.163265	0.170732	0.230769	0.078947	0.170213	0.156863	0.068182	0.126984	0.031746	0.0625	0.126984	0.09434	0.150943	0.276596	0.150943	0.109091	0.113208	0.113208	0.111111	0.111111	0.181818	0.181818	0.12	0.3	0.14	0.15873	0.163636	0.163636	0.169492	0.15625	0	0.140351	0.114286	0.057692	0	0.142857	0.222222	0.105263	0.147541	0.147541	0.131148	0.09322	0.109589	0.090909	0.150943	0.115942
D09355	0.075188	0.05142	0.094891	0.094891	0.058824	0.11811	0.053097	0.105569	0.102172	0.086957	0.071942	0.153226	0.084034	0.071942	0.114754	0.103175	0.101357	0.103175	0.14876	0.122951	0.122951	0.084053	0.084053	0.122302	0.122302	0.116667	0.067164	0.074841	0.110294	0.081493	0.081493	0.113636	0.101449	0.036364	0.125984	0.044643	0.064	0.036082	0.145161	0.152	0.165289	0.184	0.072464	0.105263	0.29375	0.089041	0.131148	0.177966	0.091549
D09572	0.267857	0.140351	0.211538	0.211538	0.125	0.206897	0.119048	0.22	0.203704	0.081633	0.203125	0	0.14	0.203125	0.254902	0.264151	0.178571	0.264151	0.196429	0.203704	0.203704	0.137931	0.137931	0.105263	0.105263	0.215686	0.163934	0.145455	0.19697	0.186441	0.186441	0.209677	0.212121	0	0.075758	0	0.109091	0	0.111111	0.16129	0.078125	0.117647	0.266667	0.209677	0.071429	0.175676	0.118644	0.080645	0.185714
D09621	0.151515	0.111111	0.107492	0.107492	0.113208	0.271186	0.083333	0.157895	0.147541	0.054545	0.123288	0.013333	0.107143	0.123288	0.078125	0.107692	0.197302	0.107692	0.125	0.105845	0.105845	0.163934	0.163934	0.219178	0.219178	0.135593	0.206349	0.133333	0.2	0.229508	0.229508	0.212121	0.164384	0.021739	0.134328	0.041667	0.064516	0.015152	0.098097	0.184615	0.072464	0.140845	0.140845	0.15942	0.052632	0.131611	0.075758	0.085973	0.138422
D09622	0.223329	0.212121	0.147059	0.147059	0.131148	0.287879	0.068966	0.206349	0.19403	0.114754	0.164557	0.011765	0.16129	0.164557	0.128571	0.15493	0.227273	0.15493	0.15493	0.15942	0.15942	0.140845	0.140845	0.207317	0.207317	0.166667	0.211268	0.130435	0.287671	0.25	0.25	0.25	0.202532	0.017857	0.102564	0.034483	0.134328	0.051095	0.118421	0.220196	0.166667	0.151899	0.181818	0.2	0.071429	0.209964	0.125	0.108108	0.176471
D09786	0.26087	0.209302	0.162791	0.162791	0.205882	0.23913	0.133333	0.218274	0.198157	0.111111	0.230769	0	0.222222	0.230769	0.186047	0.255814	0.177778	0.255814	0.2	0.181818	0.181818	0.120507	0.120507	0.145161	0.145161	0.225	0.183673	0.162791	0.222222	0.180124	0.180124	0.24	0.218182	0	0.074074	0	0.090909	0	0.075472	0.156863	0.076923	0.145455	0.188679	0.169811	0.051724	0.174603	0.12766	0.08	0.186441
D09989	0.213115	0.133333	0.137931	0.137931	0.14	0.303571	0.136364	0.163636	0.152542	0.076923	0.176471	0.013699	0.132075	0.176471	0.098361	0.129032	0.210526	0.129032	0.147541	0.133333	0.133333	0.189655	0.189655	0.242857	0.242857	0.160714	0.254237	0.178571	0.242424	0.280702	0.280702	0.258065	0.202899	0.022727	0.15625	0.043478	0.103448	0.007634	0.123077	0.203852	0.090909	0.179104	0.179104	0.181818	0.061538	0.168831	0.112903	0.111111	0.178082
D10027	0.206349	0.129032	0.172414	0.172414	0.156863	0.25	0.130435	0.2	0.186441	0.115385	0.138889	0.027027	0.148148	0.138889	0.112903	0.142857	0.267857	0.142857	0.180328	0.166667	0.166667	0.20339	0.20339	0.186667	0.186667	0.196429	0.206349	0.172414	0.183099	0.171875	0.171875	0.19403	0.197183	0.044444	0.206349	0.06383	0.137931	0.022901	0.136364	0.203125	0.15625	0.227273	0.157143	0.212121	0.102362	0.179487	0.126984	0.125	0.189189
D10255	0.1	0.113636	0.146341	0.146341	0.117647	0.148936	0.192308	0.216216	0.195122	0.057143	0.070175	0.057692	0.051282	0.070175	0.090909	0.085106	0.086957	0.085106	0.108696	0.113636	0.113636	0.086957	0.086957	0.114754	0.114754	0.121951	0.122449	0.119048	0.105263	0.148936	0.148936	0.113208	0.103448	0	0.122449	0	0.071429	0	0.08	0.142857	0.06	0.111111	0.090909	0.156863	0.04386	0.059701	0.162791	0.085106	0.063492
D10431	0.115385	0.083333	0.111111	0.111111	0.138889	0.163265	0.0625	0.116279	0.106383	0.025641	0.066667	0.035714	0.023256	0.066667	0.085106	0.102041	0.152174	0.102041	0.102041	0.083333	0.083333	0.081633	0.081633	0.126984	0.126984	0.113636	0.16	0.136364	0.137931	0.163265	0.163265	0.148148	0.155172	0	0.09434	0.103448	0.021277	0.026549	0.075472	0.092593	0.076923	0.105263	0.067797	0.087719	0.070175	0.057143	0.081633	0.08	0.060606
D10432	0.131579	0.081081	0.083333	0.083333	0.078125	0.180556	0.050847	0.117647	0.111111	0.030303	0.095238	0.02381	0.028571	0.095238	0.082192	0.108108	0.140845	0.108108	0.138889	0.081081	0.081081	0.125	0.125	0.137931	0.137931	0.115942	0.162162	0.130435	0.160494	0.164384	0.164384	0.168831	0.158537	0.075472	0.131579	0.090909	0.041096	0.066667	0.075949	0.0875	0.063291	0.1375	0.096386	0.139241	0.12782	0.073684	0.08	0.123288	0.076923
D00584	0.045455	0.111111	0.085714	0.085714	0.16	0.125	0.157895	0.125	0.111111	0.037037	0.04	0	0.032258	0.04	0.054054	0.05	0.051282	0.05	0.105263	0.052632	0.052632	0.051282	0.051282	0.035088	0.035088	0.121212	0.069767	0.085714	0.038462	0.071429	0.071429	0.041667	0.037736	0	0.045455	0	0.028571	0	0.022727	0.021739	0.023256	0.040816	0.0625	0.041667	0.018519	0.033333	0.051282	0.02439	0.035714
D00749	0.14	0.133333	0.225	0.225	0.176471	0.166667	0.178571	0.205128	0.186047	0.21875	0.26	0	0.194444	0.26	0.25	0.261905	0.181818	0.261905	0.232558	0.275	0.275	0.130435	0.130435	0.147541	0.147541	0.263158	0.212766	0.215881	0.203704	0.191489	0.191489	0.22	0.269231	0	0.096154	0	0.146341	0	0.166667	0.183673	0.122449	0.148148	0.291667	0.109091	0.061404	0.15873	0.238095	0.177778	0.169492
D01064	0.163934	0.160714	0.285714	0.285714	0.2	0.22807	0.175	0.196078	0.181818	0.152174	0.184615	0	0.163265	0.184615	0.207547	0.218182	0.157895	0.218182	0.34	0.27451	0.27451	0.222222	0.222222	0.150685	0.150685	0.291667	0.163934	0.166667	0.19697	0.25	0.25	0.209677	0.212121	0.105263	0.163934	0.046512	0.089286	0.032	0.111111	0.16129	0.169492	0.206349	0.245902	0.229508	0.144068	0.175676	0.222222	0.175439	0.185714
D01223	0.086207	0.036364	0.057692	0.057692	0.095238	0.068966	0.083333	0.039216	0.036364	0.097561	0.078125	0	0.042553	0.078125	0.12	0.072727	0.115385	0.072727	0.053571	0.055556	0.055556	0.054545	0.054545	0.070423	0.070423	0.058824	0.105263	0.1	0.059701	0.107143	0.107143	0.063492	0.058824	0.096774	0.086207	0	0.12766	0.052174	0.068966	0.04918	0.051724	0.030303	0.096774	0.063492	0.049587	0.161765	0.035714	0.017241	0.171875
D01244	0.083333	0.095238	0.073171	0.073171	0.166667	0.159091	0.12	0.135135	0.121951	0.030303	0.054545	0.04	0.027027	0.054545	0.046512	0.043478	0.146341	0.043478	0.090909	0.045455	0.045455	0.044444	0.044444	0.065574	0.065574	0.102564	0.181818	0.189189	0.052632	0.085106	0.085106	0.056604	0.070175	0	0.083333	0.083333	0.02439	0.009174	0.085106	0.081633	0.086957	0.096154	0.075472	0.056604	0.045045	0.046154	0.119048	0.090909	0.04918
D01309	0.057692	0.088889	0.068182	0.068182	0.085714	0.102041	0.107143	0.097561	0.088889	0.027778	0.051724	0	0.025	0.051724	0.043478	0.040816	0.06383	0.040816	0.085106	0.042553	0.042553	0.041667	0.041667	0.030303	0.030303	0.095238	0.1	0.093023	0.032787	0.058824	0.058824	0.035088	0.032258	0	0.057692	0	0.022727	0.056075	0.018868	0.037037	0.019231	0.034483	0.071429	0.035088	0.034783	0.044118	0.041667	0.02	0.046875
D01784	0.057692	0.088889	0.119048	0.119048	0.117647	0.125	0.148148	0.125	0.113636	0.233333	0.089286	0	0.078947	0.089286	0.090909	0.085106	0.136364	0.085106	0.159091	0.139535	0.139535	0.06383	0.06383	0.079365	0.079365	0.179487	0.1	0.119048	0.067797	0.125	0.125	0.072727	0.066667	0.181818	0.122449	0	0.153846	0	0.102041	0.056604	0.104167	0.090909	0.111111	0.035088	0.0625	0.145161	0.111111	0.085106	0.155172
D03154	0.325536	0.192308	0.2	0.2	0.133333	0.264151	0.157895	0.318182	0.291667	0.086957	0.291449	0	0.173913	0.291449	0.326087	0.391304	0.145455	0.391304	0.333333	0.265306	0.265306	0.235294	0.235294	0.125	0.125	0.311111	0.192982	0.153846	0.310345	0.196429	0.196429	0.333333	0.262295	0.054054	0.114754	0.05	0.115385	0.016129	0.098361	0.232143	0.064516	0.177419	0.273997	0.309091	0.081967	0.253731	0.188679	0.142857	0.269841
D04197	0.093439	0.088889	0.068182	0.068182	0.085714	0.141649	0.107143	0.097561	0.088889	0.027778	0.051724	0.018519	0.025	0.051724	0.043478	0.040816	0.111111	0.040816	0.085106	0.042553	0.042553	0.041667	0.041667	0.07425	0.07425	0.095238	0.122449	0.119048	0.032787	0.08	0.08	0.035088	0.06136	0	0.078431	0.102662	0.022727	0.046296	0.052632	0.037037	0.039216	0.084991	0.071429	0.035088	0.053097	0.044118	0.06383	0.055901	0.046875
D04964	0.166667	0.14202	0.151515	0.151515	0.116667	0.220588	0.090909	0.233333	0.21875	0.064516	0.111111	0.012048	0.186441	0.111111	0.203125	0.212121	0.156662	0.212121	0.290323	0.238095	0.238095	0.19697	0.19697	0.127907	0.127907	0.229508	0.166667	0.117647	0.260274	0.180654	0.180654	0.275362	0.223684	0.037736	0.166667	0.074074	0.088235	0.014286	0.136986	0.214286	0.123288	0.236111	0.177249	0.275362	0.104478	0.162791	0.19697	0.176471	0.170732
D07974	0.045455	0.111111	0.085714	0.085714	0.16	0.125	0.157895	0.125	0.111111	0.037037	0.04	0	0.032258	0.04	0.054054	0.05	0.051282	0.05	0.105263	0.052632	0.052632	0.051282	0.051282	0.035088	0.035088	0.121212	0.069767	0.085714	0.038462	0.071429	0.071429	0.041667	0.037736	0	0.045455	0	0.028571	0	0.022727	0.021739	0.023256	0.040816	0.0625	0.041667	0.018519	0.033333	0.051282	0.02439	0.035714
D10172	0.098039	0.086957	0.142857	0.142857	0.114286	0.1	0.185185	0.15	0.136364	0.225806	0.192308	0	0.166667	0.192308	0.195122	0.181818	0.108696	0.181818	0.181818	0.190476	0.190476	0.085106	0.085106	0.095238	0.095238	0.205128	0.12	0.134752	0.142857	0.1	0.1	0.153846	0.203704	0	0.076923	0	0.15	0	0.170213	0.14	0.125	0.12963	0.196078	0.071429	0.052632	0.125	0.186047	0.181818	0.133333
D00142	0.220339	0.1	0.254902	0.254902	0.145833	0.163934	0.142857	0.169811	0.157895	0.148936	0.2	0	0.137255	0.2	0.27451	0.307692	0.175439	0.307692	0.283019	0.294118	0.294118	0.175439	0.175439	0.164384	0.164384	0.235294	0.180328	0.172161	0.230769	0.224138	0.224138	0.245902	0.208955	0.102564	0.142857	0.045455	0.127273	0.031746	0.126984	0.177419	0.147541	0.184615	0.262295	0.206349	0.133333	0.189189	0.155172	0.192982	0.2
D02115	0.220339	0.1	0.254902	0.254902	0.145833	0.163934	0.142857	0.169811	0.157895	0.148936	0.2	0	0.137255	0.2	0.27451	0.307692	0.175439	0.307692	0.283019	0.294118	0.294118	0.175439	0.175439	0.164384	0.164384	0.235294	0.180328	0.172161	0.230769	0.224138	0.224138	0.245902	0.208955	0.102564	0.142857	0.045455	0.127273	0.031746	0.126984	0.177419	0.147541	0.184615	0.262295	0.206349	0.133333	0.189189	0.155172	0.192982	0.2
D03942	0.216667	0.098361	0.25	0.25	0.142857	0.16129	0.139535	0.166667	0.155172	0.145833	0.19697	0	0.134615	0.19697	0.269231	0.301887	0.172414	0.301887	0.277778	0.240741	0.240741	0.172414	0.172414	0.178082	0.178082	0.230769	0.177419	0.169065	0.227273	0.220339	0.220339	0.241935	0.188406	0.1	0.140625	0.044444	0.145455	0.031496	0.142857	0.174603	0.163934	0.181818	0.21875	0.184615	0.141667	0.202703	0.152542	0.189655	0.214286
D05589	0.213115	0.096774	0.245283	0.245283	0.14	0.15873	0.136364	0.163636	0.152542	0.142857	0.19403	0	0.132075	0.19403	0.264151	0.296296	0.169492	0.296296	0.272727	0.236364	0.236364	0.169492	0.169492	0.16	0.16	0.226415	0.174603	0.166078	0.223881	0.216667	0.216667	0.238095	0.185714	0.097561	0.138462	0.043478	0.122807	0.03125	0.123077	0.171875	0.16129	0.179104	0.215385	0.181818	0.140496	0.184211	0.15	0.186441	0.194444
D06238	0.245283	0.153846	0.171717	0.171717	0.113636	0.160714	0.105263	0.302326	0.276596	0.090909	0.220339	0	0.11828	0.220339	0.18	0.232604	0.173077	0.232604	0.185468	0.192843	0.192843	0.355556	0.355556	0.144928	0.144928	0.205074	0.2	0.208333	0.213115	0.203704	0.203704	0.22807	0.229508	0	0.081967	0	0.076923	0.00813	0.083333	0.190053	0.066667	0.100775	0.20339	0.22807	0.04	0.138889	0.123389	0.087719	0.147059
D06239	0.2	0.125	0.138211	0.138211	0.089286	0.132353	0.08	0.236364	0.220339	0.071429	0.183099	0	0.094017	0.183099	0.145161	0.187801	0.140625	0.187801	0.227197	0.155698	0.155698	0.327273	0.327273	0.123457	0.123457	0.163575	0.164179	0.166667	0.178082	0.166667	0.166667	0.188406	0.191781	0.042553	0.098592	0.04	0.0625	0.022556	0.069444	0.156662	0.085714	0.114094	0.169014	0.223881	0.059701	0.119048	0.101056	0.104478	0.125
D00595	0	0	0	0	0	0	0	0.027778	0.025	0.074074	0	0	0	0	0.025641	0.02381	0.05	0.02381	0.04878	0.051282	0.051282	0.02439	0.02439	0.016949	0.016949	0.055556	0	0	0	0.022222	0.022222	0	0	0.125	0.119048	0	0.15625	0	0.095238	0	0.125	0.061224	0	0.040816	0.07767	0.067797	0.02439	0.075	0.072727
D00753	0.029412	0.010204	0.028632	0.028632	0.035294	0.083333	0.0125	0.010638	0.010204	0.035714	0.009091	0.05	0.022472	0.009091	0.031579	0.01	0.06383	0.01	0.030612	0.020619	0.020619	0.041667	0.041667	0.134615	0.134615	0.021277	0.071429	0.054348	0.036697	0.04	0.04	0.038095	0.036364	0	0.101784	0.067568	0.021505	0.044872	0.130435	0.070707	0.095745	0.111111	0.009174	0.018692	0.141892	0.025424	0.052632	0.10989	0.026316
D00944	0	0	0	0	0	0	0	0	0	0	0	0	0	0	0	0	0	0	0	0.054054	0.054054	0	0	0	0	0	0	0	0	0	0	0	0.038462	0	0.071429	0	0.09375	0	0.047619	0	0.075	0.041667	0.041667	0.065217	0.038095	0.016667	0	0.051282	0.017857
D02206	0	0	0	0	0	0	0	0.027778	0.025	0.074074	0	0	0	0	0.025641	0.02381	0.05	0.02381	0.04878	0.051282	0.051282	0.02439	0.02439	0.016949	0.016949	0.055556	0	0	0	0.022222	0.022222	0	0	0.125	0.119048	0	0.15625	0	0.095238	0	0.125	0.061224	0	0.040816	0.07767	0.067797	0.02439	0.075	0.072727
D02714	0.028571	0.009901	0.027749	0.027749	0.034091	0.080808	0.012048	0.010309	0.009901	0.046512	0.00885	0.048544	0.021739	0.00885	0.030612	0.009709	0.084211	0.009709	0.04	0.040816	0.040816	0.040404	0.040404	0.130841	0.130841	0.03125	0.069307	0.052632	0.035714	0.059406	0.059406	0.037037	0.035398	0.012821	0.113402	0.064935	0.031579	0.044025	0.126316	0.068627	0.104167	0.107843	0.008929	0.018182	0.143617	0.033333	0.05102	0.106383	0.034483
D04966	0	0	0	0	0	0	0	0	0	0	0	0	0	0	0	0	0	0	0	0.054054	0.054054	0	0	0	0	0	0	0	0	0	0	0	0.038462	0	0.071429	0	0.09375	0	0.047619	0	0.075	0.041667	0.041667	0.065217	0.038095	0.016667	0	0.051282	0.017857
D08351	0.130435	0.121951	0.128205	0.128205	0.09375	0.108696	0.12	0.135135	0.121951	0.259259	0.074074	0	0.1875	0.074074	0.153846	0.116279	0.119048	0.116279	0.142857	0.15	0.15	0.119048	0.119048	0.048387	0.048387	0.162162	0.061224	0.040189	0.090909	0.101512	0.101512	0.098039	0.070175	0.045455	0.155556	0	0.235294	0	0.186047	0.081633	0.25	0.163265	0.075472	0.12	0.104762	0.096774	0.119048	0.2	0.103448
D08352	0.130435	0.121951	0.128205	0.128205	0.09375	0.108696	0.12	0.135135	0.121951	0.259259	0.074074	0	0.1875	0.074074	0.153846	0.116279	0.119048	0.116279	0.142857	0.15	0.15	0.119048	0.119048	0.048387	0.048387	0.162162	0.061224	0.040189	0.090909	0.101512	0.101512	0.098039	0.070175	0.045455	0.155556	0	0.235294	0	0.186047	0.081633	0.25	0.163265	0.075472	0.12	0.104762	0.096774	0.119048	0.2	0.103448
D08900	0.028302	0.009804	0.027467	0.027467	0.033708	0.08	0.011905	0.010204	0.009804	0.034091	0.008772	0.048077	0.021505	0.008772	0.030303	0.009615	0.061224	0.009615	0.029412	0.019802	0.019802	0.04	0.04	0.12963	0.12963	0.020408	0.068627	0.052083	0.035398	0.038462	0.038462	0.036697	0.035088	0	0.097684	0.064103	0.020619	0.037267	0.125	0.067961	0.091837	0.106796	0.00885	0.018018	0.138158	0.02459	0.050505	0.105263	0.025424
D10076	0.029703	0.010309	0.028939	0.028939	0.035714	0.084211	0.012658	0.010753	0.010309	0.036145	0.009174	0.050505	0.022727	0.009174	0.031915	0.010101	0.076087	0.010101	0.041667	0.031579	0.031579	0.042105	0.042105	0.135922	0.135922	0.032609	0.072165	0.054945	0.037037	0.05102	0.05102	0.038462	0.036697	0.013514	0.11828	0.068493	0.032967	0.045161	0.131868	0.071429	0.108696	0.112245	0.009259	0.018868	0.139756	0.034483	0.053191	0.111111	0.035714
D01690	0.169492	0.188679	0.18677	0.18677	0.155556	0.387755	0.216216	0.255319	0.235294	0.108696	0.190476	0.061538	0.170213	0.190476	0.192308	0.181818	0.207547	0.181818	0.160714	0.211538	0.211538	0.254902	0.254902	0.322581	0.322581	0.176471	0.254545	0.173077	0.305085	0.307692	0.307692	0.327273	0.278689	0	0.169492	0.04878	0.072727	0.007937	0.172414	0.372549	0.135593	0.193548	0.213115	0.237288	0.099174	0.164384	0.306122	0.181818	0.173913
D04050	0.262295	0.183333	0.232143	0.232143	0.090909	0.206349	0.104167	0.240741	0.224138	0.113208	0.211679	0	0.17757	0.211679	0.243339	0.252144	0.142857	0.252144	0.280702	0.224138	0.224138	0.220339	0.220339	0.080432	0.080432	0.236364	0.115942	0.15	0.192146	0.163859	0.163859	0.203566	0.178082	0.043478	0.115942	0.040816	0.063492	0.015038	0.070423	0.164179	0.119403	0.171429	0.188406	0.227273	0.101563	0.148148	0.107692	0.106061	0.155844
D04537	0.241379	0.19349	0.306122	0.306122	0.145833	0.290909	0.170732	0.215686	0.2	0.2	0.2	0.028571	0.288889	0.2	0.25	0.236364	0.190053	0.236364	0.259259	0.245283	0.245283	0.149228	0.149228	0.148649	0.148649	0.26	0.142857	0.185185	0.269841	0.217839	0.217839	0.288136	0.265625	0	0.16129	0.045455	0.068966	0.023622	0.20339	0.177419	0.272727	0.262295	0.222222	0.169231	0.152542	0.157895	0.218182	0.214286	0.166667
D00219	0.132075	0.08	0.130435	0.130435	0.194444	0.18	0.2	0.162791	0.148936	0.2	0.1	0.034483	0.277778	0.1	0.177778	0.166667	0.170213	0.166667	0.166667	0.227273	0.227273	0.122449	0.122449	0.177419	0.177419	0.186047	0.2	0.192661	0.172414	0.128107	0.128107	0.185185	0.15	0	0.22449	0.133333	0.136364	0.017241	0.340909	0.196078	0.208333	0.326531	0.101695	0.084746	0.107143	0.101449	0.222222	0.365854	0.107692
D00271	0.102041	0.090909	0.179487	0.179487	0.121212	0.12766	0.25	0.189189	0.170732	0.241379	0.111111	0	0.333333	0.111111	0.236842	0.219512	0.139535	0.219512	0.25	0.263158	0.263158	0.166667	0.166667	0.116667	0.116667	0.285714	0.102041	0.170483	0.148148	0.152174	0.152174	0.16	0.105263	0.041667	0.227273	0	0.222222	0.009009	0.232558	0.145833	0.181818	0.255319	0.134615	0.074074	0.072727	0.147541	0.225	0.219512	0.157895
D00335	0.166667	0.122807	0.215686	0.215686	0.177778	0.232143	0.121951	0.2	0.185185	0.209302	0.169231	0.029412	0.244444	0.169231	0.235294	0.222222	0.226415	0.222222	0.222222	0.28	0.28	0.181818	0.181818	0.202899	0.202899	0.244898	0.206897	0.330472	0.238095	0.210526	0.210526	0.254237	0.215385	0.025	0.22807	0.1	0.153846	0.015873	0.326923	0.224138	0.214286	0.315789	0.136364	0.104478	0.135593	0.162162	0.27451	0.346939	0.171429
D00336	0.2	0.132075	0.223709	0.223709	0.170213	0.290909	0.170732	0.265306	0.245283	0.2	0.181818	0.028571	0.288889	0.181818	0.25	0.236364	0.211573	0.236364	0.259259	0.32	0.32	0.257036	0.257036	0.214286	0.214286	0.285714	0.2	0.254902	0.269841	0.217839	0.217839	0.288136	0.246154	0.02381	0.241379	0.095238	0.148148	0.023622	0.314815	0.303571	0.206897	0.350877	0.184615	0.169231	0.123967	0.189189	0.288462	0.333333	0.2
D00379	0.092593	0.104167	0.133333	0.133333	0.166667	0.208333	0.166667	0.166667	0.152174	0.171429	0.12069	0.017241	0.285714	0.12069	0.181818	0.170213	0.173913	0.170213	0.170213	0.177778	0.177778	0.125	0.125	0.180328	0.180328	0.190476	0.204082	0.177829	0.218182	0.208333	0.208333	0.235294	0.172414	0	0.204082	0.064516	0.139535	0.008621	0.288889	0.25	0.1875	0.333333	0.103448	0.105263	0.088496	0.102941	0.227273	0.309524	0.109375
D00380	0.1	0.113636	0.146341	0.146341	0.117647	0.102041	0.192308	0.184211	0.166667	0.275862	0.12963	0	0.322581	0.12963	0.230769	0.214286	0.136364	0.214286	0.243902	0.25641	0.25641	0.162791	0.162791	0.114754	0.114754	0.277778	0.1	0.166253	0.145455	0.148936	0.148936	0.156863	0.122807	0.083333	0.25	0	0.25	0.008929	0.227273	0.142857	0.204545	0.25	0.111111	0.072727	0.081818	0.163934	0.219512	0.214286	0.175439
D00593	0.106061	0.080645	0.12069	0.12069	0.098039	0.2	0.113636	0.166667	0.155172	0.195652	0.082192	0.073529	0.204082	0.082192	0.157895	0.15	0.152542	0.15	0.169492	0.218182	0.218182	0.133333	0.133333	0.228571	0.228571	0.185185	0.15873	0.14841	0.157143	0.125	0.125	0.166667	0.138889	0.023256	0.296625	0.146341	0.166667	0.015504	0.333333	0.193548	0.224138	0.3	0.083333	0.069444	0.122951	0.1125	0.236364	0.326923	0.118421
D00594	0.180328	0.157895	0.230769	0.230769	0.145833	0.339623	0.170732	0.169811	0.157895	0.148936	0.2	0.043478	0.208333	0.2	0.25	0.236364	0.240741	0.236364	0.307692	0.269231	0.269231	0.196429	0.196429	0.268657	0.268657	0.26	0.180328	0.207547	0.269841	0.224138	0.224138	0.288136	0.227273	0.04878	0.180328	0.095238	0.087719	0.023622	0.20339	0.237288	0.206897	0.305085	0.184615	0.245902	0.162393	0.157895	0.218182	0.236364	0.166667
D01111	0.150943	0.1	0.204545	0.204545	0.128205	0.2	0.121212	0.133333	0.122449	0.228571	0.098361	0.089286	0.205128	0.098361	0.148936	0.14	0.166667	0.14	0.212766	0.122449	0.122449	0.12	0.12	0.213115	0.213115	0.155556	0.150943	0.120507	0.15	0.147228	0.147228	0.160714	0.147541	0.066667	0.244898	0.296296	0.085106	0.017094	0.276596	0.127273	0.282609	0.269231	0.1	0.12069	0.133273	0.069444	0.166667	0.357143	0.073529
D01356	0.196755	0.169978	0.133333	0.133333	0.135135	0.130604	0.118211	0.139535	0.12766	0.205882	0.160714	0	0.323529	0.160714	0.181818	0.195652	0.173913	0.195652	0.145833	0.204545	0.204545	0.227273	0.227273	0.142857	0.142857	0.162791	0.156863	0.177829	0.155172	0.176471	0.176471	0.166667	0.152542	0.034483	0.156863	0	0.113636	0.026316	0.074074	0.153846	0.14	0.185185	0.116928	0.166667	0.051282	0.136364	0.102041	0.078431	0.145161
D01599	0.12963	0.1	0.12766	0.12766	0.157895	0.176471	0.15625	0.159091	0.145833	0.162162	0.116667	0.051724	0.27027	0.116667	0.173913	0.163265	0.166667	0.163265	0.163265	0.170213	0.170213	0.12	0.12	0.174603	0.174603	0.181818	0.196078	0.196388	0.169492	0.153846	0.153846	0.181818	0.186441	0	0.270833	0.129032	0.133333	0.017094	0.276596	0.192308	0.18	0.346939	0.1	0.083333	0.106195	0.1	0.244444	0.295455	0.106061
D01799	0.096154	0.085106	0.166667	0.166667	0.176471	0.217391	0.222222	0.175	0.159091	0.181818	0.105263	0.017857	0.30303	0.105263	0.190476	0.177778	0.181818	0.177778	0.177778	0.186047	0.186047	0.130435	0.130435	0.166667	0.166667	0.2	0.1875	0.186441	0.226415	0.217391	0.217391	0.244898	0.157895	0	0.212766	0.068966	0.146341	0.008772	0.244444	0.234043	0.195652	0.319149	0.127273	0.109091	0.080357	0.106061	0.238095	0.261905	0.112903
D01854	0.16	0.090175	0.139971	0.139971	0.09375	0.264706	0.080617	0.115942	0.109589	0.169492	0.107143	0.035714	0.177419	0.107143	0.15942	0.136986	0.15493	0.136986	0.185714	0.140845	0.140845	0.108108	0.108108	0.172333	0.172333	0.147059	0.144737	0.088154	0.158537	0.12713	0.12713	0.166667	0.142857	0.035714	0.175676	0.109091	0.054795	0.043165	0.211268	0.173333	0.214286	0.272476	0.095238	0.123457	0.279661	0.095745	0.138889	0.257576	0.1
D02425	0.1	0.088889	0.146341	0.146341	0.117647	0.102041	0.192308	0.184211	0.166667	0.275862	0.109091	0	0.322581	0.109091	0.230769	0.214286	0.136364	0.214286	0.243902	0.25641	0.25641	0.162791	0.162791	0.114754	0.114754	0.277778	0.1	0.157635	0.145455	0.125	0.125	0.156863	0.103448	0.083333	0.25	0	0.25	0.008929	0.227273	0.142857	0.204545	0.25	0.111111	0.072727	0.081818	0.163934	0.219512	0.214286	0.175439
D02427	0.142857	0.09434	0.12	0.12	0.175	0.125	0.142857	0.148936	0.137255	0.15	0.111111	0.015873	0.25	0.111111	0.163265	0.153846	0.113208	0.153846	0.153846	0.16	0.16	0.113208	0.113208	0.132353	0.132353	0.170213	0.122807	0.15942	0.142857	0.125	0.125	0.152542	0.140625	0	0.185185	0.055556	0.125	0.042735	0.188679	0.140351	0.148148	0.232143	0.095238	0.079365	0.084746	0.09589	0.18	0.2	0.101449
D02430	0.203125	0.121643	0.183533	0.183533	0.153846	0.225806	0.152174	0.264151	0.245614	0.134615	0.169014	0.054795	0.26	0.169014	0.22807	0.216667	0.19403	0.216667	0.216667	0.224138	0.224138	0.220339	0.220339	0.232877	0.232877	0.236364	0.166667	0.210526	0.25	0.200632	0.200632	0.265625	0.228571	0.021277	0.203125	0.085106	0.116667	0.022727	0.245902	0.344828	0.153846	0.28125	0.171429	0.157143	0.101563	0.177215	0.263158	0.258621	0.186667
D06177	0.1	0.113636	0.146341	0.146341	0.117647	0.102041	0.192308	0.184211	0.166667	0.275862	0.12963	0	0.322581	0.12963	0.230769	0.214286	0.136364	0.214286	0.243902	0.25641	0.25641	0.162791	0.162791	0.114754	0.114754	0.277778	0.1	0.166253	0.145455	0.148936	0.148936	0.156863	0.122807	0.083333	0.25	0	0.25	0.008929	0.227273	0.142857	0.204545	0.25	0.111111	0.072727	0.081818	0.163934	0.219512	0.214286	0.175439
D07117	0.156863	0.104167	0.133333	0.133333	0.2	0.208333	0.25	0.139535	0.12766	0.138889	0.160714	0.035088	0.285714	0.160714	0.155556	0.145833	0.173913	0.145833	0.145833	0.12766	0.12766	0.173913	0.173913	0.220339	0.220339	0.162791	0.204082	0.243902	0.196429	0.183673	0.183673	0.211538	0.214286	0	0.255319	0.137931	0.088889	0.017391	0.26087	0.153846	0.163265	0.333333	0.142857	0.125	0.098214	0.102941	0.173913	0.27907	0.109375
D07118	0.129032	0.122807	0.192308	0.192308	0.152174	0.254545	0.15	0.2	0.185185	0.209302	0.134328	0.014493	0.264108	0.134328	0.204589	0.2	0.25	0.2	0.222222	0.306122	0.306122	0.175407	0.175407	0.185714	0.185714	0.244898	0.206897	0.20155	0.258065	0.225577	0.225577	0.275862	0.19697	0.025	0.206897	0.047619	0.153846	0.007874	0.301887	0.267857	0.214286	0.356239	0.153846	0.116139	0.116667	0.146667	0.25	0.32	0.15493
D08970	0.218182	0.150943	0.229167	0.229167	0.162791	0.2	0.194444	0.1875	0.173077	0.139535	0.196721	0.063492	0.252955	0.196721	0.2	0.188679	0.192308	0.188679	0.145455	0.150943	0.150943	0.169811	0.169811	0.212121	0.212121	0.16	0.196429	0.340909	0.229508	0.2	0.2	0.224138	0.245902	0	0.240741	0.108108	0.096154	0.008065	0.157895	0.172414	0.160714	0.263158	0.220339	0.145161	0.110169	0.169014	0.265306	0.166667	0.161765
C00575	0.148148	0.018182	0.08	0.08	0.071429	0.070175	0.027027	0.04	0.076923	0	0.096774	0.016393	0	0.096774	0.078431	0.09434	0.096154	0.09434	0.035714	0.037037	0.037037	0.036364	0.036364	0.071429	0.071429	0.039216	0.127273	0.125	0.076923	0.070175	0.070175	0.081967	0.092308	0	0.050847	0.028571	0	0.043478	0.016667	0.067797	0.016949	0.030769	0.116667	0.047619	0.032787	0.068493	0.017857	0.017544	0.072464
C04911	0.015385	0	0.033333	0.033333	0.017699	0.023438	0.009346	0.008264	0.008	0.085714	0.022222	0.015385	0.033275	0.022222	0.02459	0.024	0.03252	0.024	0.066667	0.041322	0.041322	0.03252	0.03252	0.049204	0.049204	0.042373	0.03125	0.042017	0.021898	0.029874	0.029874	0.022556	0.029197	0.061856	0.056	0.039216	0.049914	0.292517	0.05475	0.007576	0.072607	0.070313	0.014815	0.014925	0.094972	0.057143	0.024194	0.064892	0.058824
[truncated: 420 more columns]
